# Supplementary material for: Global, Regional, and National Burden of Benign Prostatic Hyperplasia: A Comprehensive Analysis from 1990 to 2021
Source: Research Square preprint supplement (doi:10.21203/rs.3.rs-5011206/v1), 2024-12-16
Supplement: Supplementary file 1 [file a1a8d3d8c9a550fdca5a0307.docx]

**Supplementary materials:**

**Title: Global, Regional, and National Burden of Benign Prostatic Hyperplasia: A Comprehensive Analysis from 1990 to 2021**

**Authors’ names:** Xin Chen1, 2, *, Siyuan Yang3, *, Zihao Chen2, Haodong Xu1, Xinling Tang1, Yuxin Lin1, Yuhua Huang1, #, Jianquan Hou1, 2, #, Xuedong Wei1, #

**Authors’ affiliations:**

1 Department of Urology, The First Affiliated Hospital of Soochow University, Suzhou, 215031, People’s Republic of China;

2 Department of Urology, The Fourth Affiliated Hospital of Soochow University, Suzhou Dushu Lake Hospital, Suzhou, 215125, People’s Republic of China;

3 Department of Neurosurgery, The First Affiliated Hospital of Soochow University, Suzhou, 215031, People’s Republic of China;

* These authors contributed equally to this work.

# These authors are co-authors of communication.

**Corresponding author:**

Xuedong Wei, Department of Urology, The First Affiliated Hospital of Soochow University, No. 899 Pinghai Road, Suzhou, 215006, People’s Republic of China, Tel/Fax +86 0512-67972184, Email wxd0422@suda.edu.cn / [wxd0422@163.com](mailto:wxd0422@163.com)

Jianquan Hou, Department of Urology, The First Affiliated Hospital of Soochow University, No. 899 Pinghai Road, Suzhou, 215006, People’s Republic of China, Tel/Fax +86 0512-67972184, Email [xf192@163.com](mailto:xf192@163.com)

Yuhua Huang, Department of Urology, The First Affiliated Hospital of Soochow University, No. 899 Pinghai Road, Suzhou, 215006, People’s Republic of China, Tel/Fax +86 0512-67972184, Email sdfyyhyh@163.com


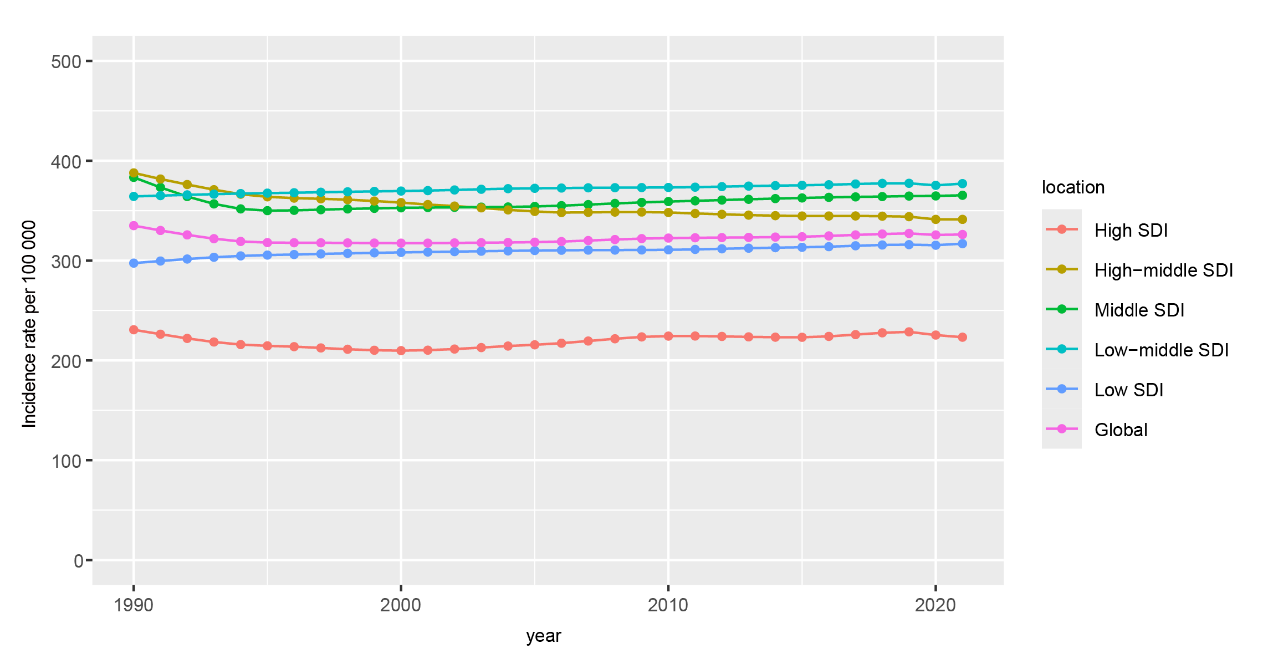


**Figure S1.** Temporal trend of benign prostatic hyperplasia burden in global and 5 SDI regions: the rates of incidence from 1990 to 2021.


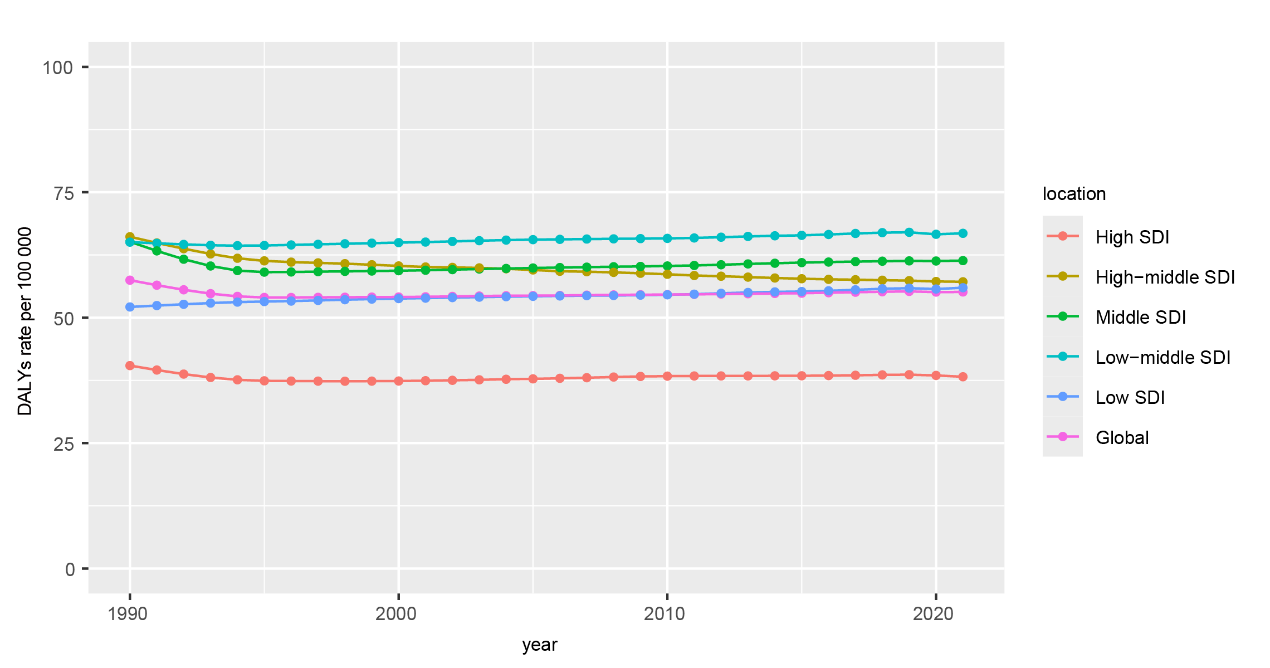


**Figure S2.** Temporal trend of benign prostatic hyperplasia burden in global and 5 SDI regions: the rates of DALYs from 1990 to 2021.


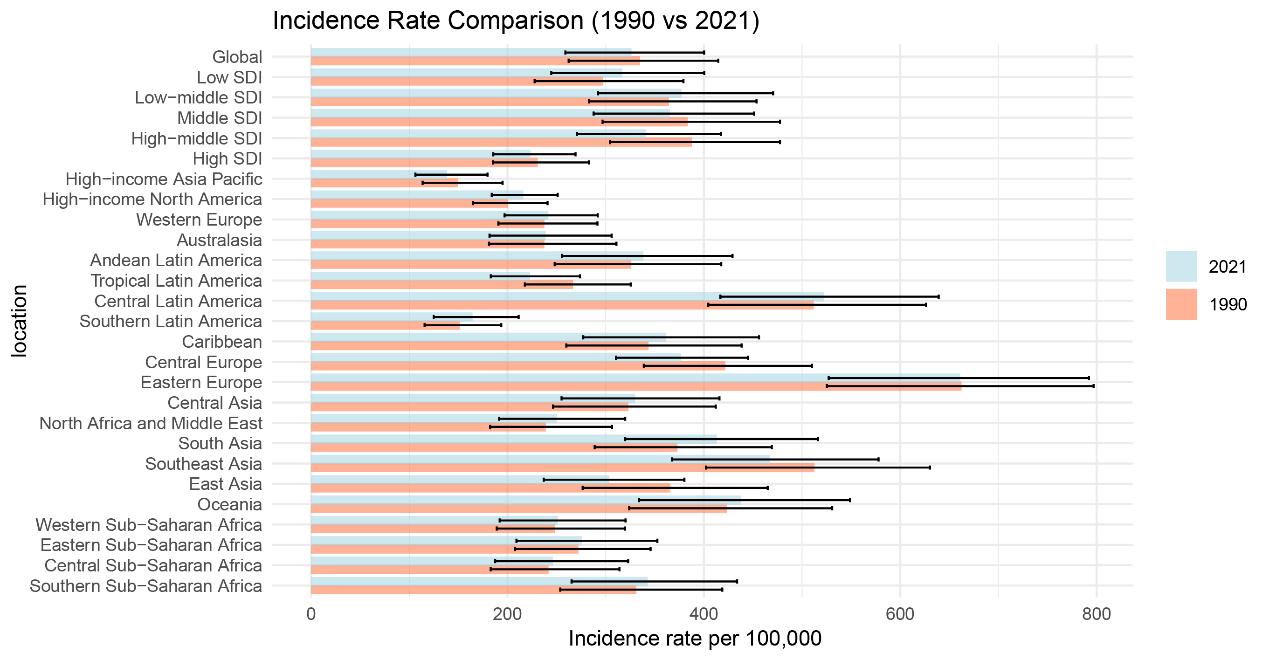


**Figure S3.** Temporal trend of benign prostatic hyperplasia burden in regions: incidence rate per 100,000 population in 1990 and 2021.


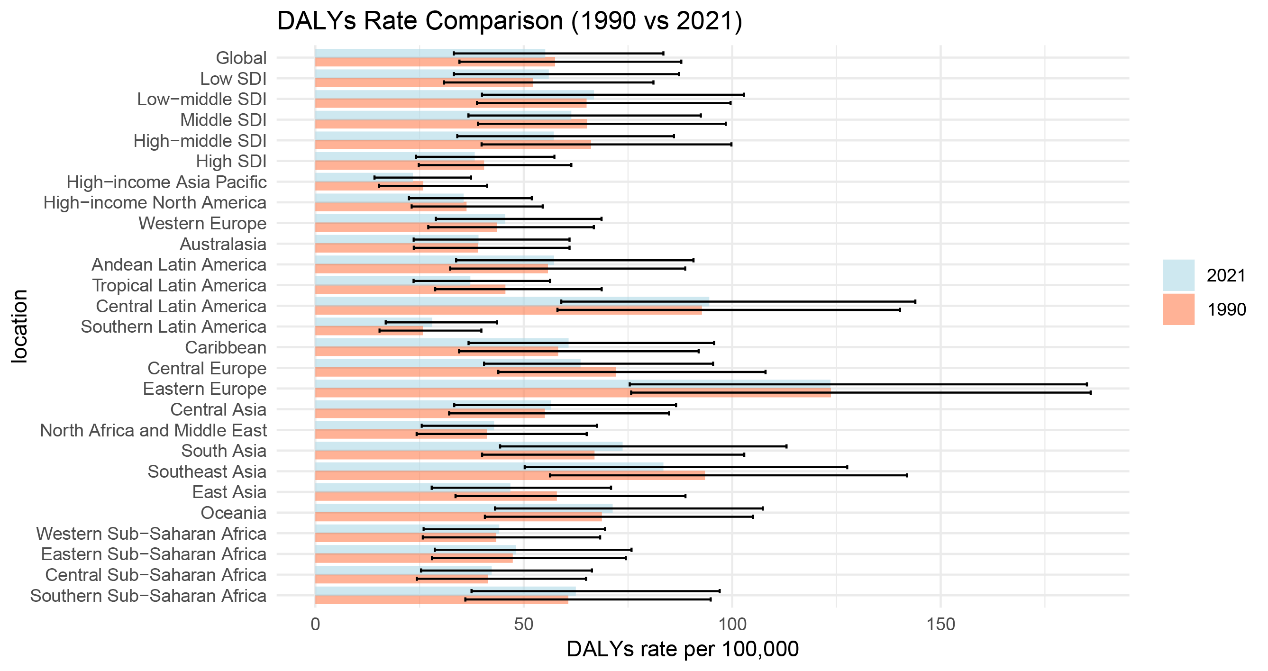


**Figure S4.** Temporal trend of benign prostatic hyperplasia burden in regions: DALYs rate per 100,000 population in 1990 and 2021.


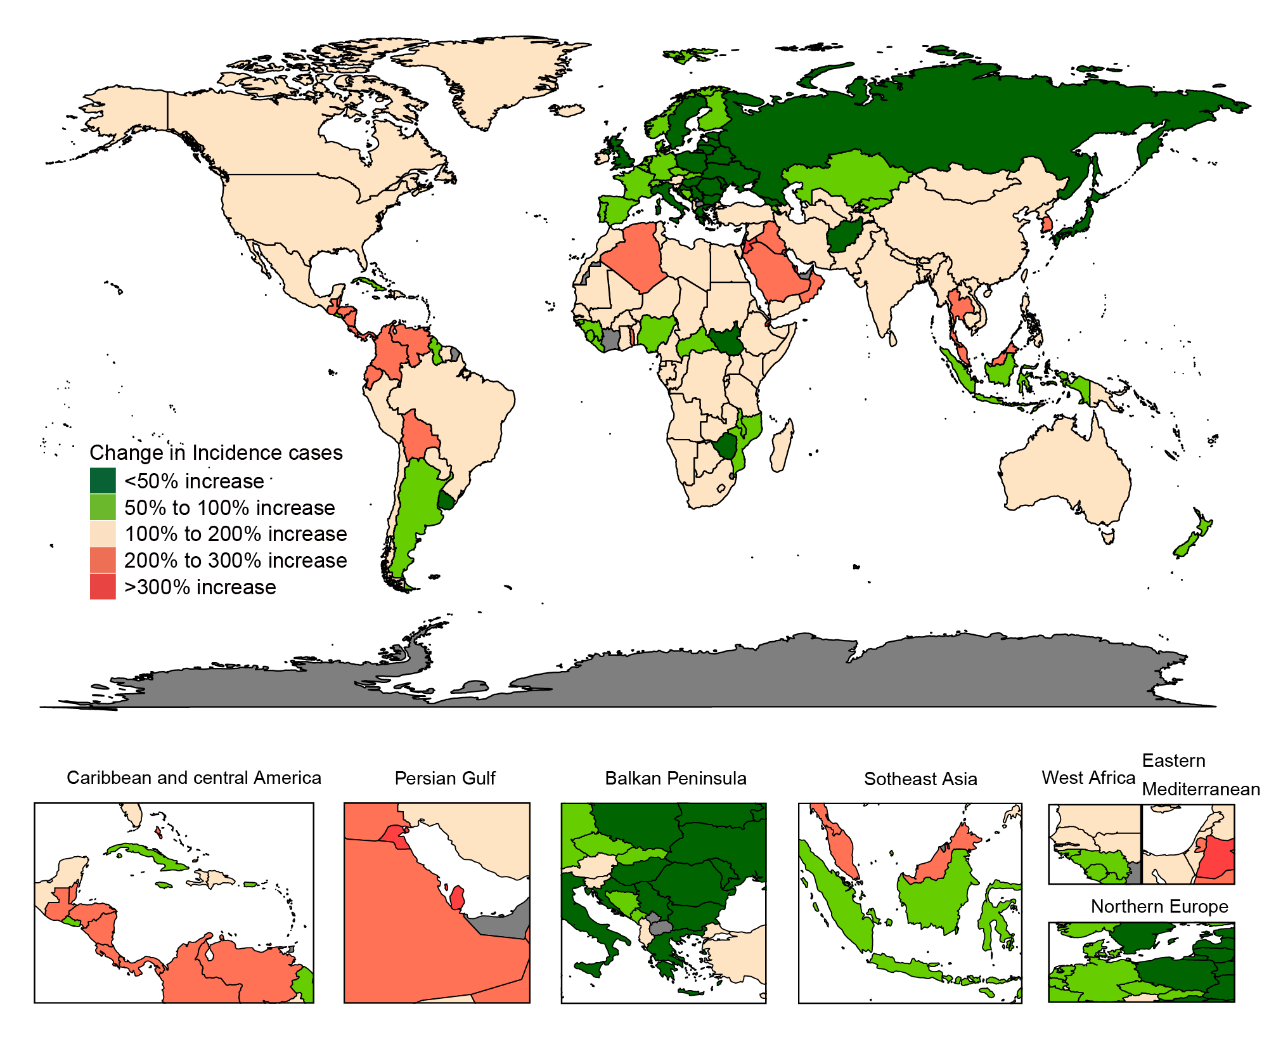


**Figure S5.** Temporal trend of benign prostatic hyperplasia burden in countries level: incidence cases across 204 countries in 1990 and 2021.


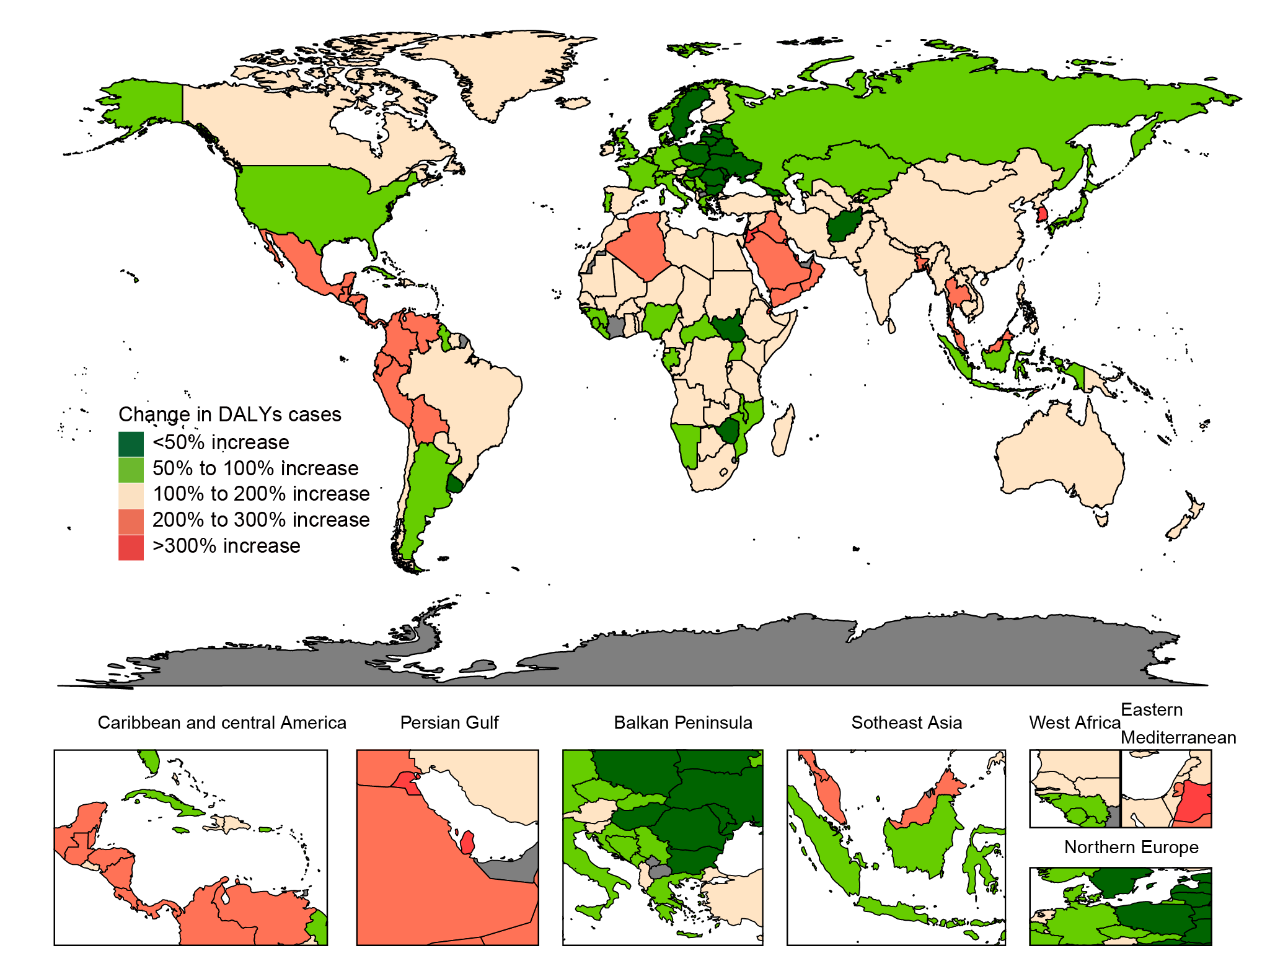


**Figure S6.** Temporal trend of benign prostatic hyperplasia burden in countries level: DALYs cases across 204 countries in 1990 and 2021.


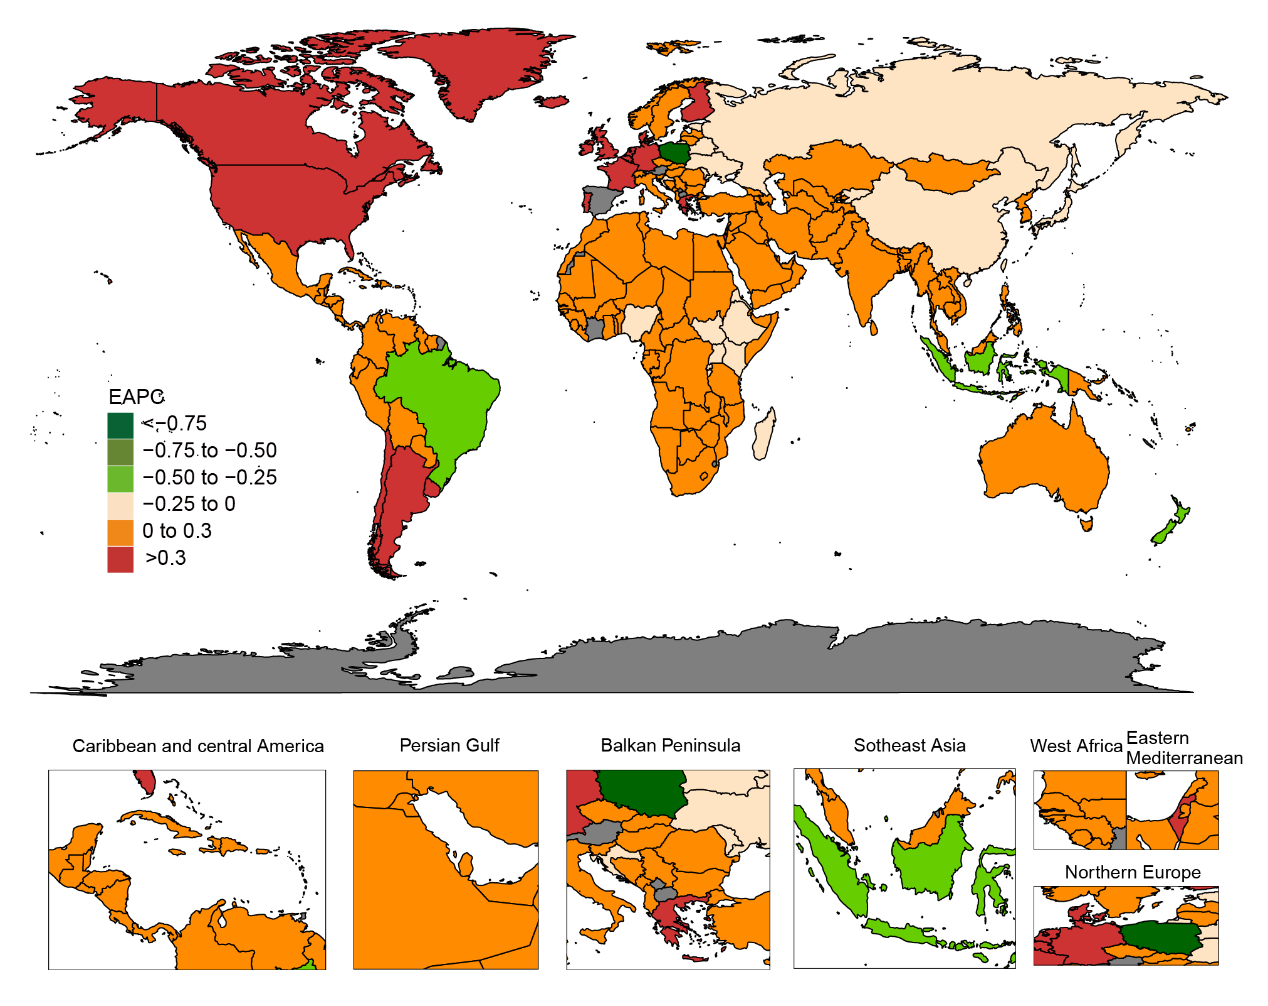


**Figure S7.** Temporal trend of benign prostatic hyperplasia burden in countries level: EAPC in incidence rates across 204 countries from 1990 to 2021.


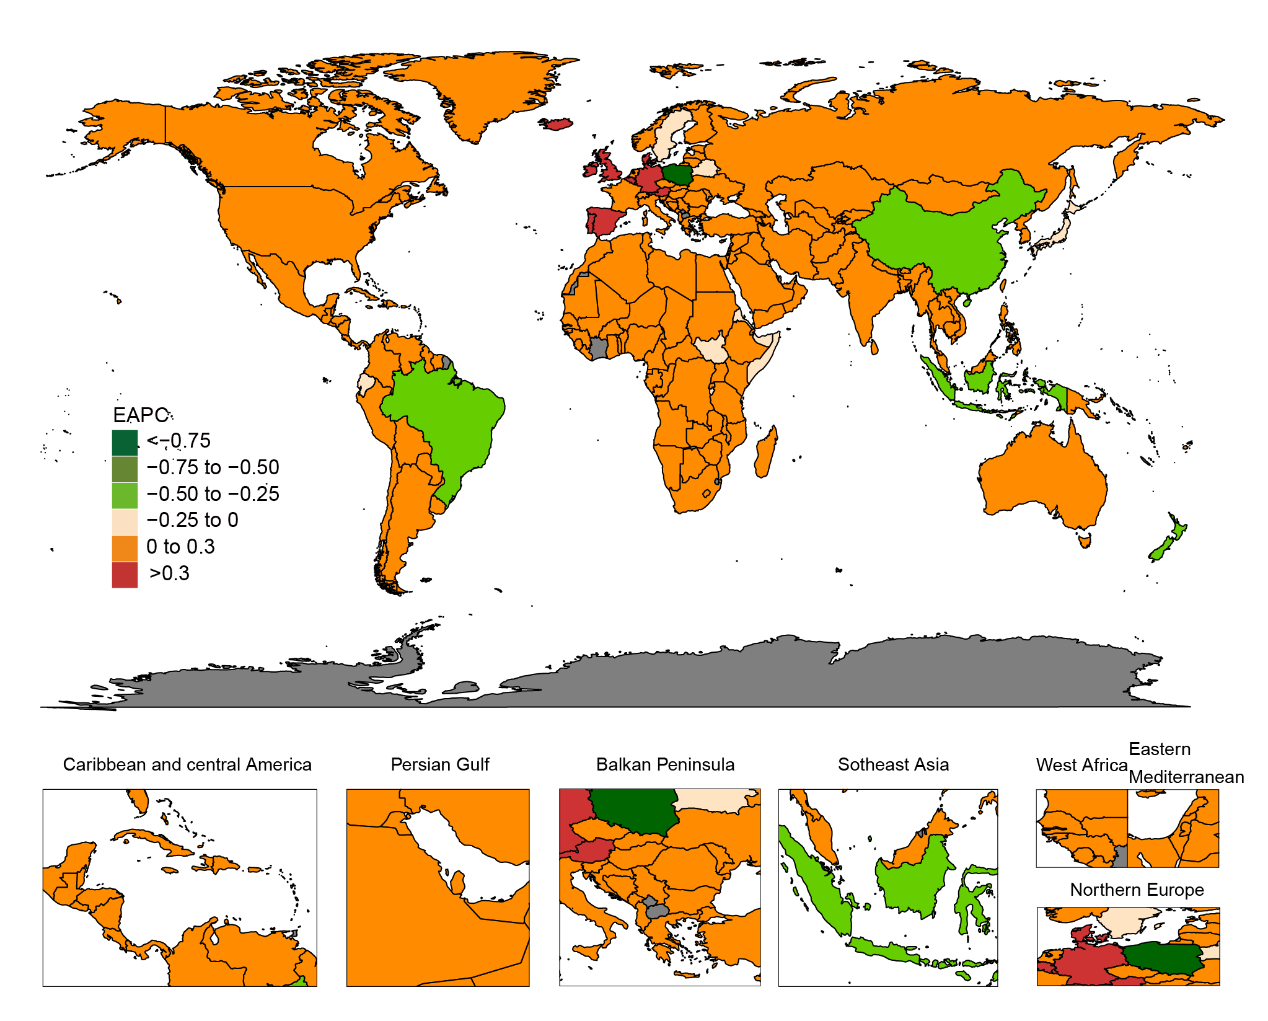


**Figure S8.** Temporal trend of benign prostatic hyperplasia burden in countries level: EAPC in DALYs rates across 204 countries from 1990 to 2021.


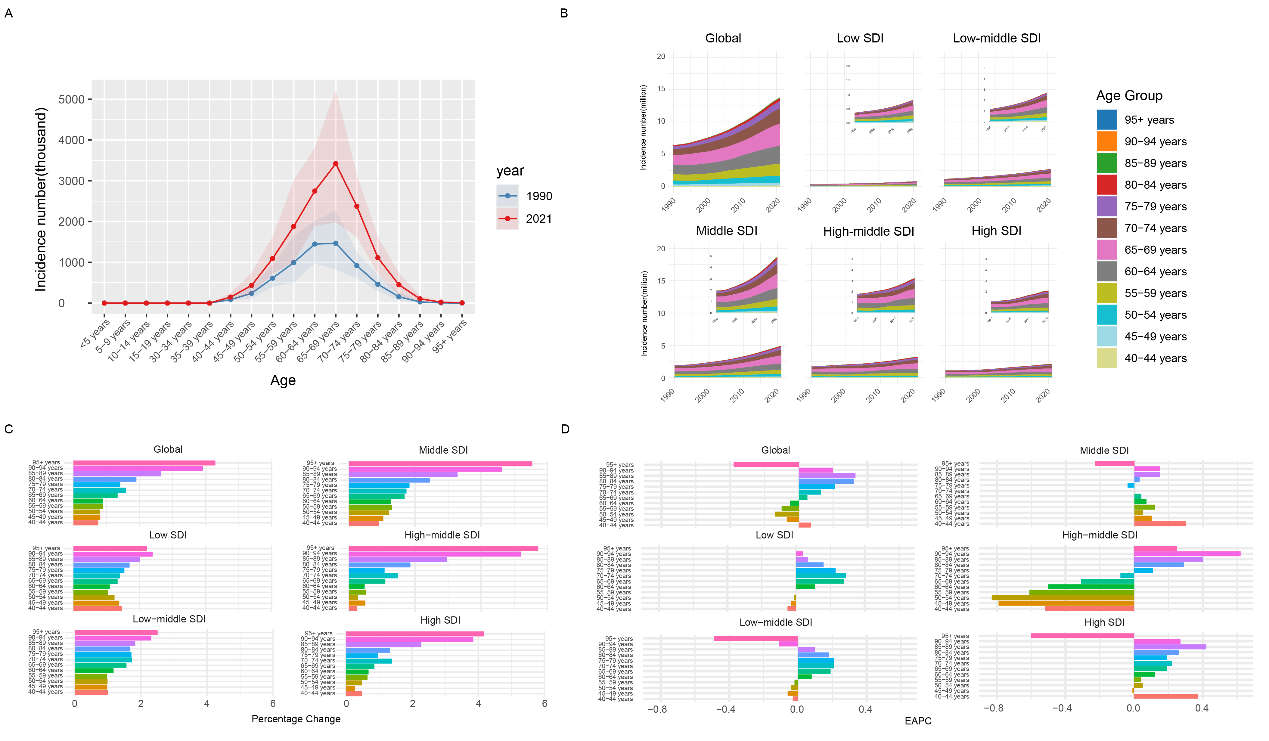


**Figure S9.** Temporal trend of benign prostatic hyperplasia burden by age pattern in global and 5 SDI regions: Global age-specific distribution of benign prostatic hyperplasia incidence cases.


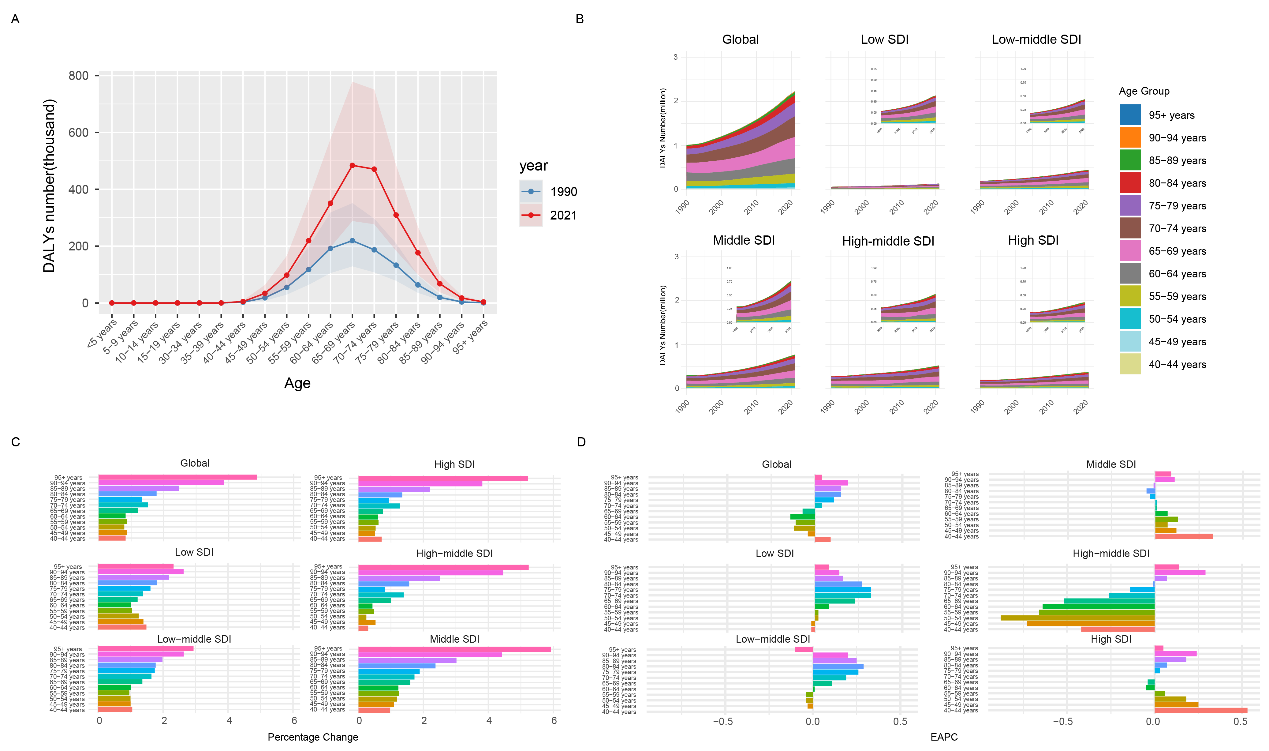


**Figure S10.** Temporal trend of benign prostatic hyperplasia burden by age pattern in global and 5 SDI regions: Global age-specific distribution of benign prostatic hyperplasia DALYs cases.


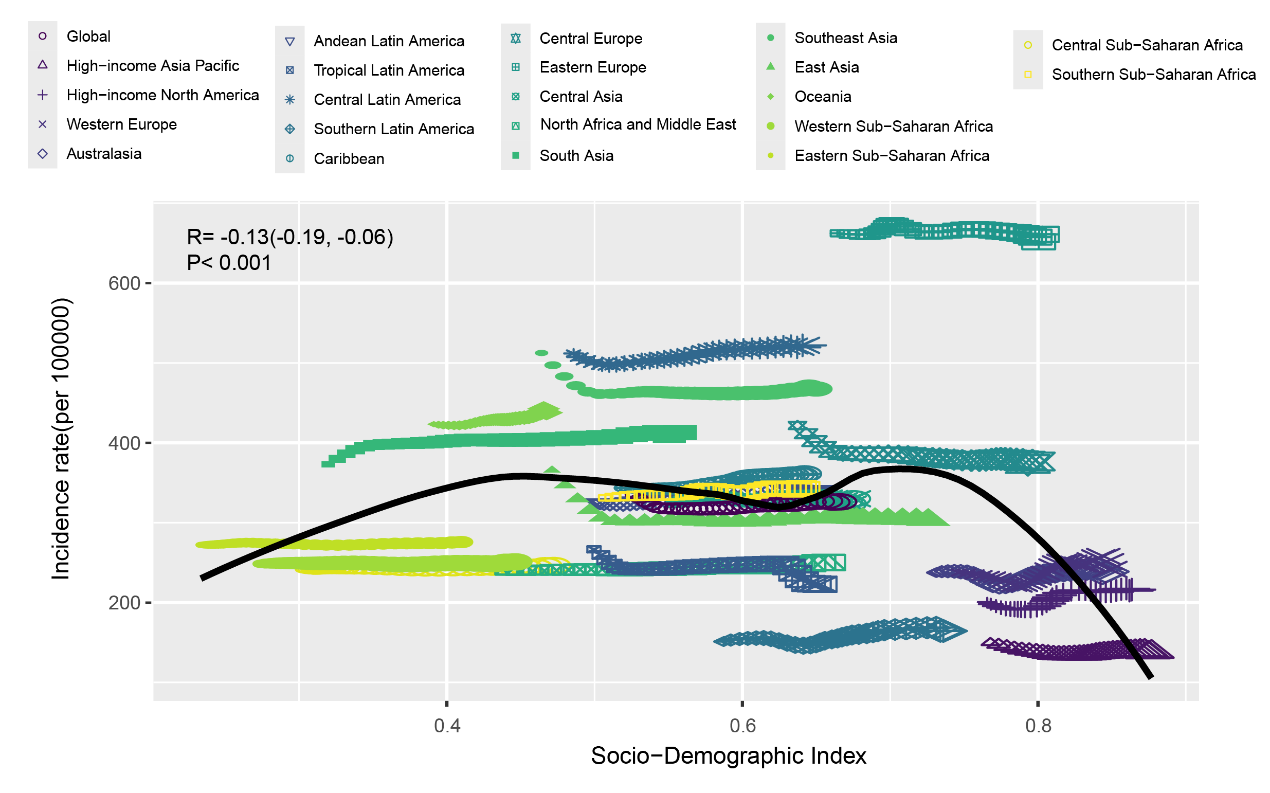


**Figure S11.** The associations between the SDI and incidence rates per 100,000 population of benign prostatic hyperplasia across 21 GBD regions. SDI = Socio-Demographic Index, GBD = Global Burden of Disease


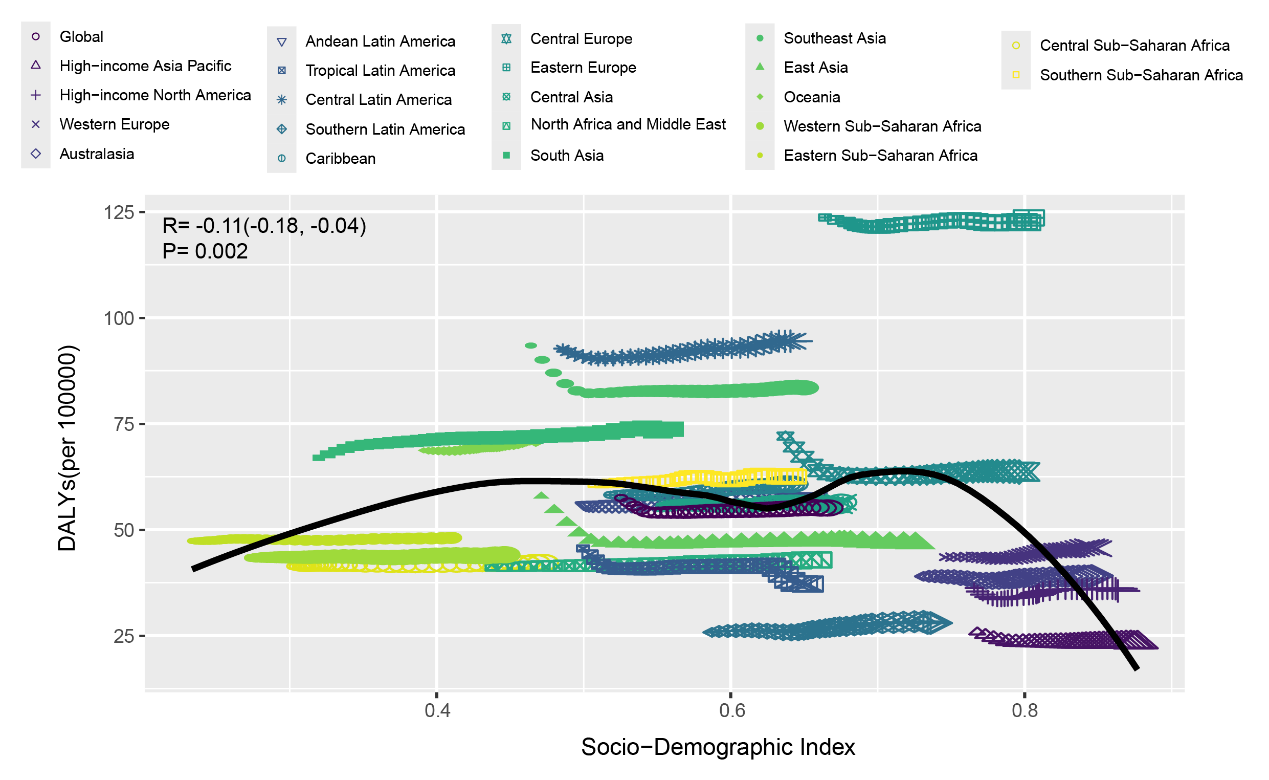


**Figure S12.** The associations between the SDI and DALYs rates per 100,000 population of benign prostatic hyperplasia across 21 GBD regions. SDI = Socio-Demographic Index, GBD = Global Burden of Disease


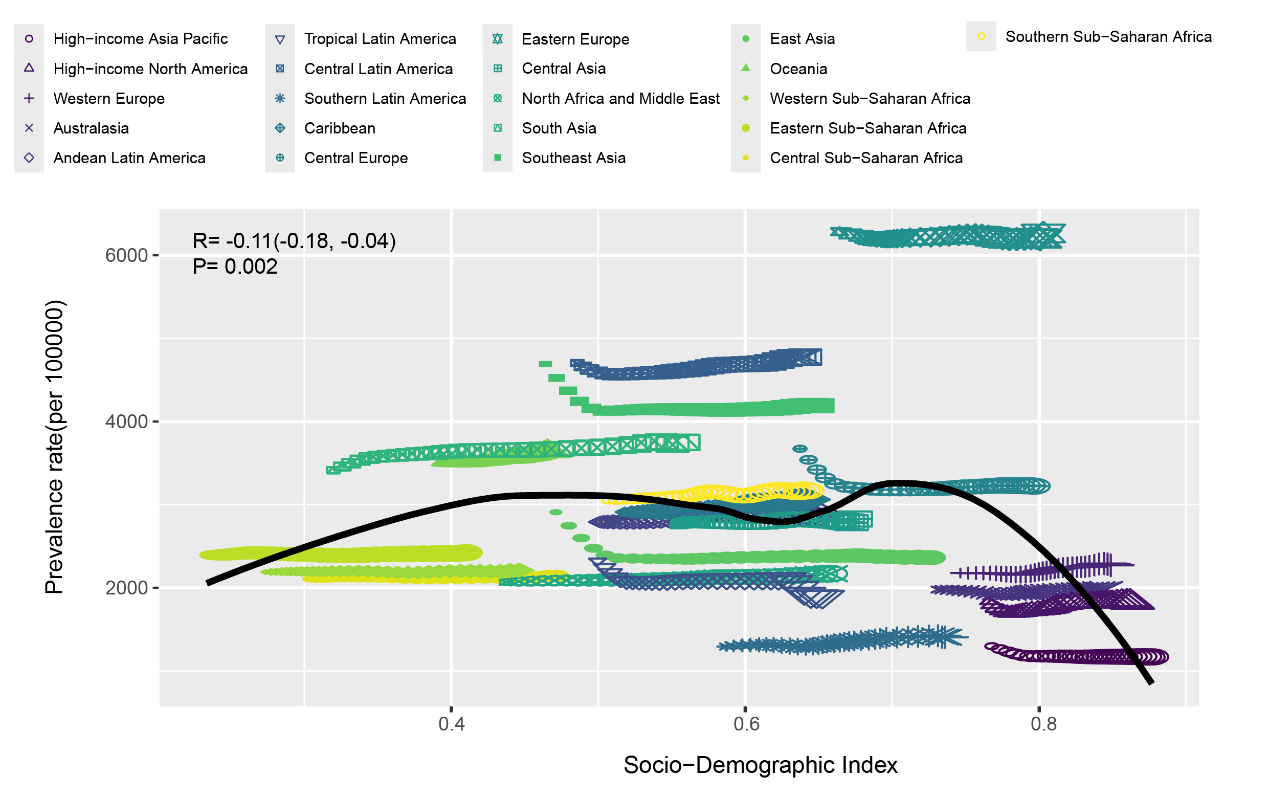


**Figure S13.** The associations between the SDI and prevalent rates per 100,000 population of benign prostatic hyperplasia across 21 GBD regions without global. SDI = Socio-Demographic Index, GBD = Global Burden of Disease


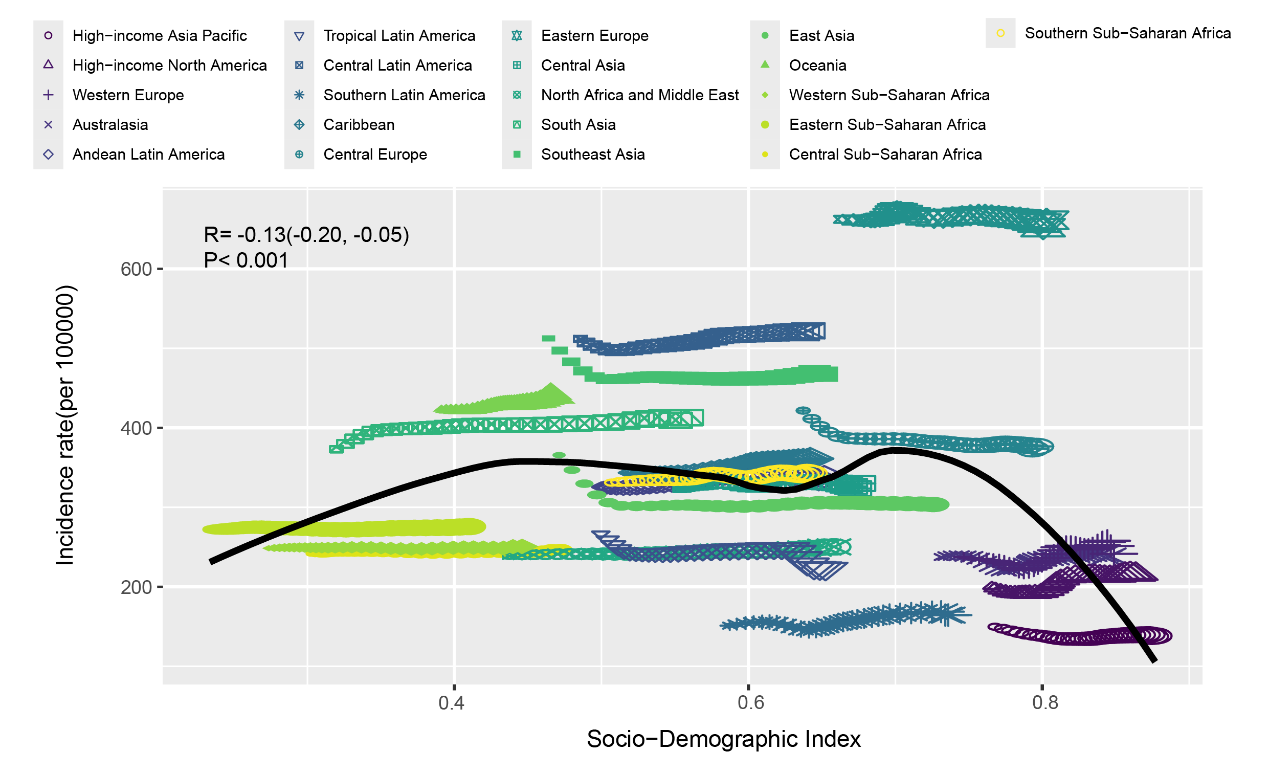


**Figure S14.** The associations between the SDI and incidence rates per 100,000 population of benign prostatic hyperplasia across 21 GBD regions without global. SDI = Socio-Demographic Index, GBD = Global Burden of Disease


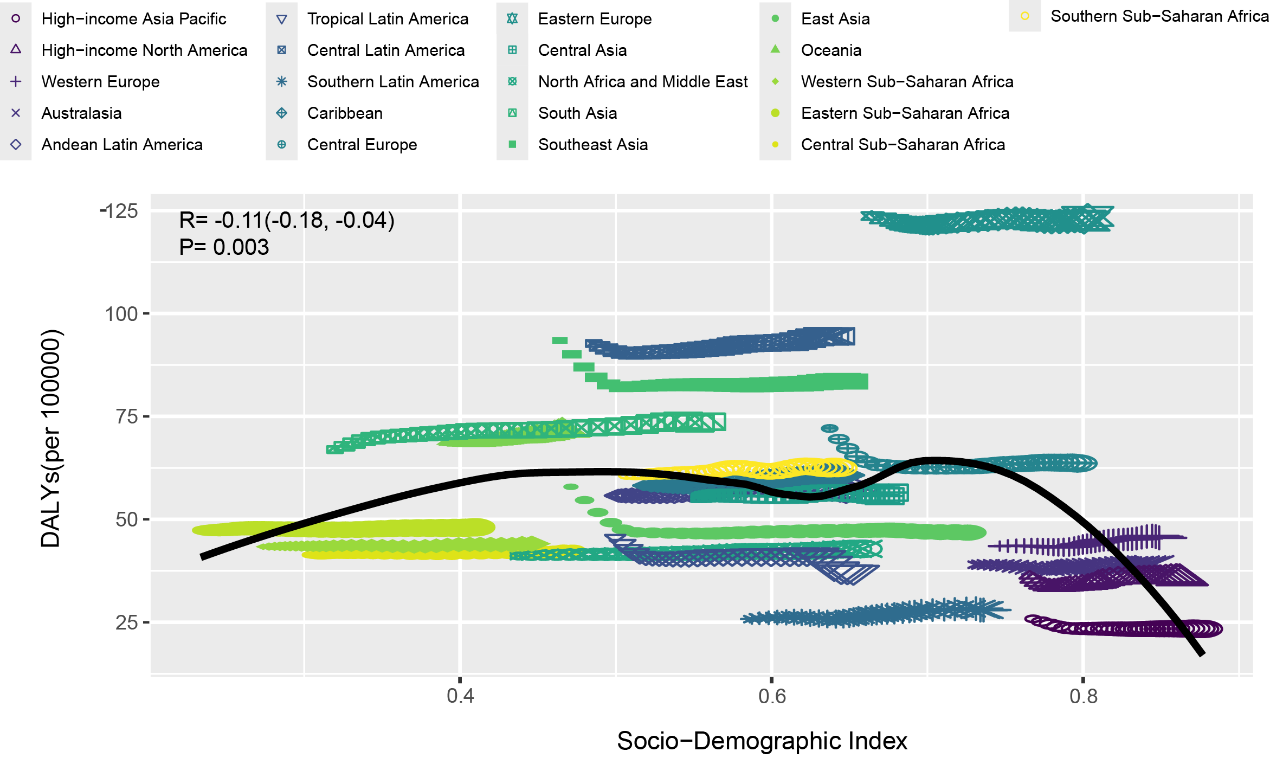


**Figure S15.** The associations between the SDI and DALYs rates per 100,000 population of benign prostatic hyperplasia across 21 GBD regions without global. SDI = Socio-Demographic Index, GBD = Global Burden of Disease


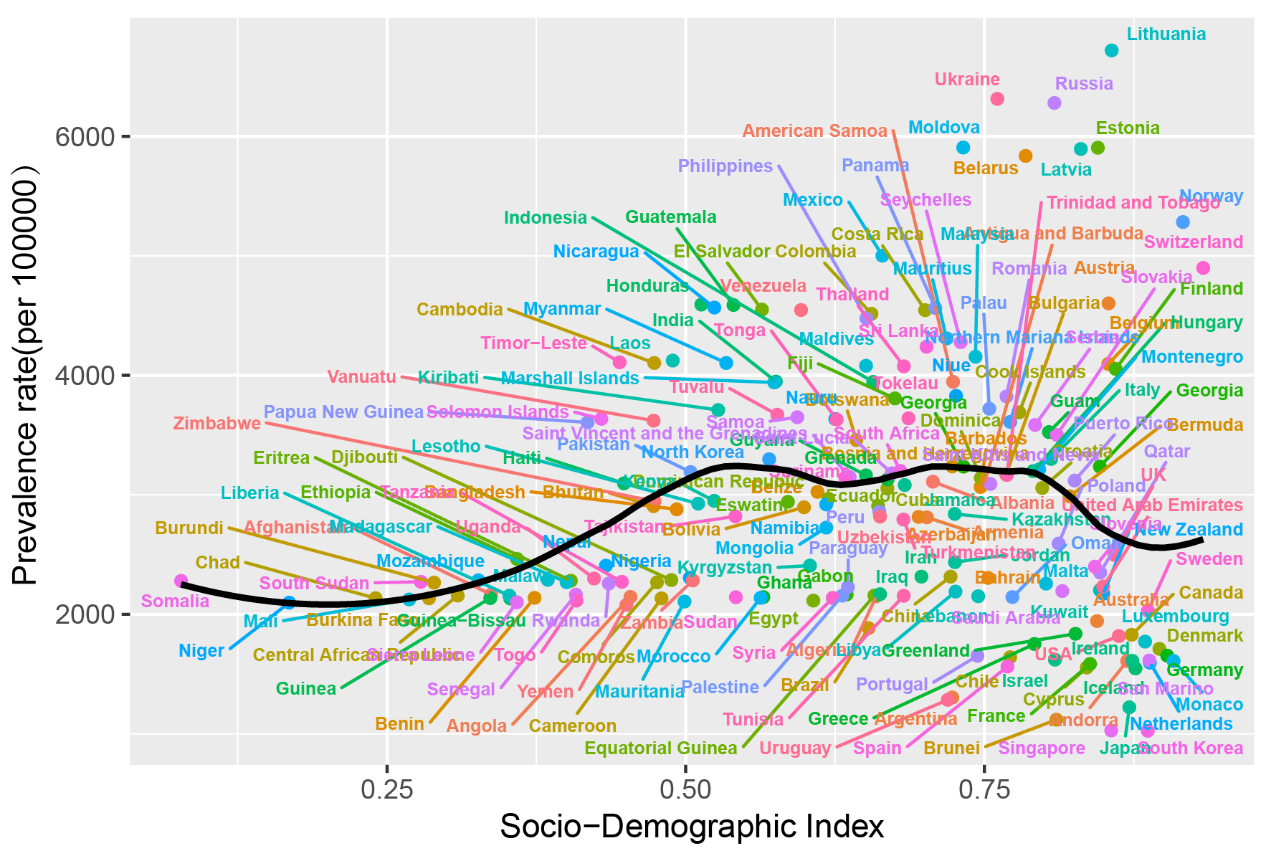


**Figure S16.** The associations between the SDI and prevalent rates per 100,000 population of benign prostatic hyperplasia across 204 countries. SDI = Socio-Demographic Index, GBD = Global Burden of Disease


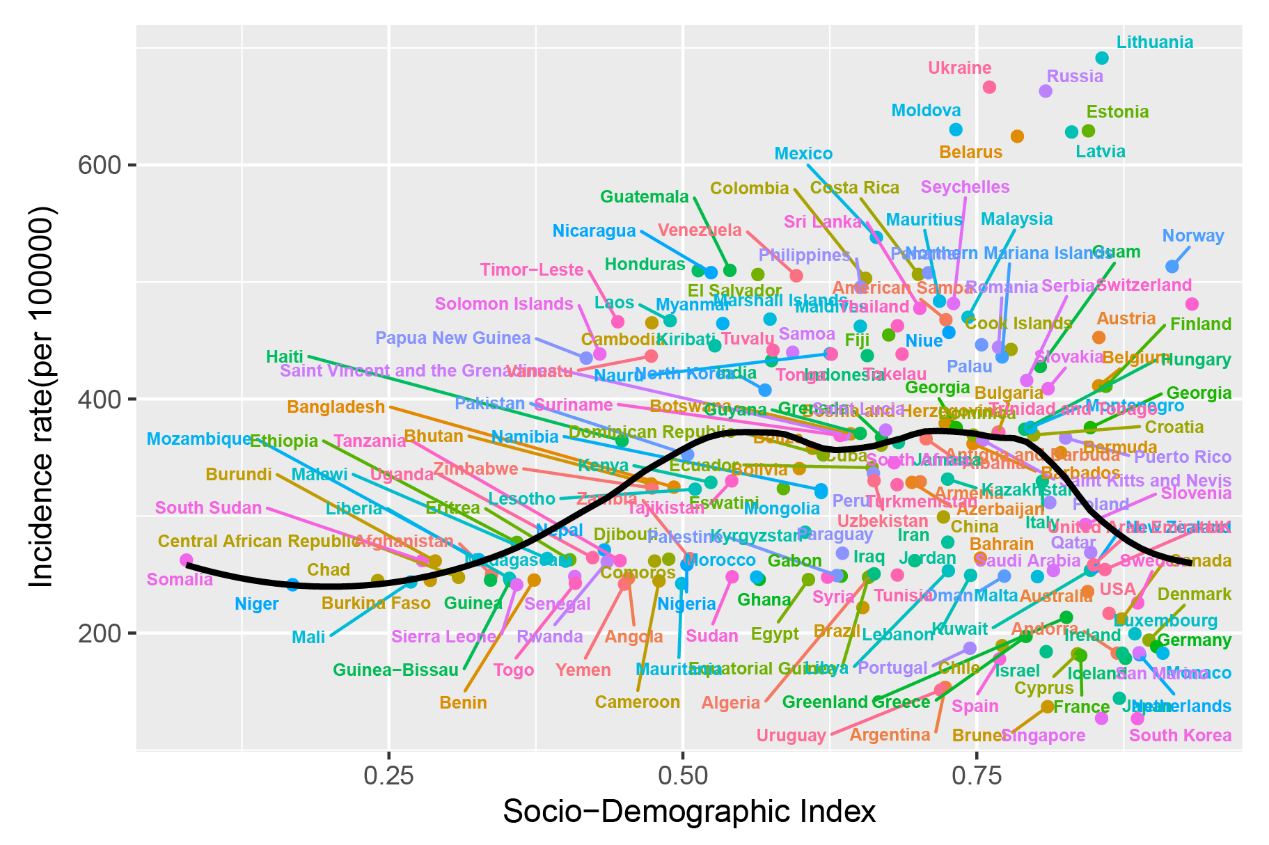


**Figure S17.** The associations between the SDI and incidence rates per 100,000 population of benign prostatic hyperplasia across 204 countries. SDI = Socio-Demographic Index, GBD = Global Burden of Disease


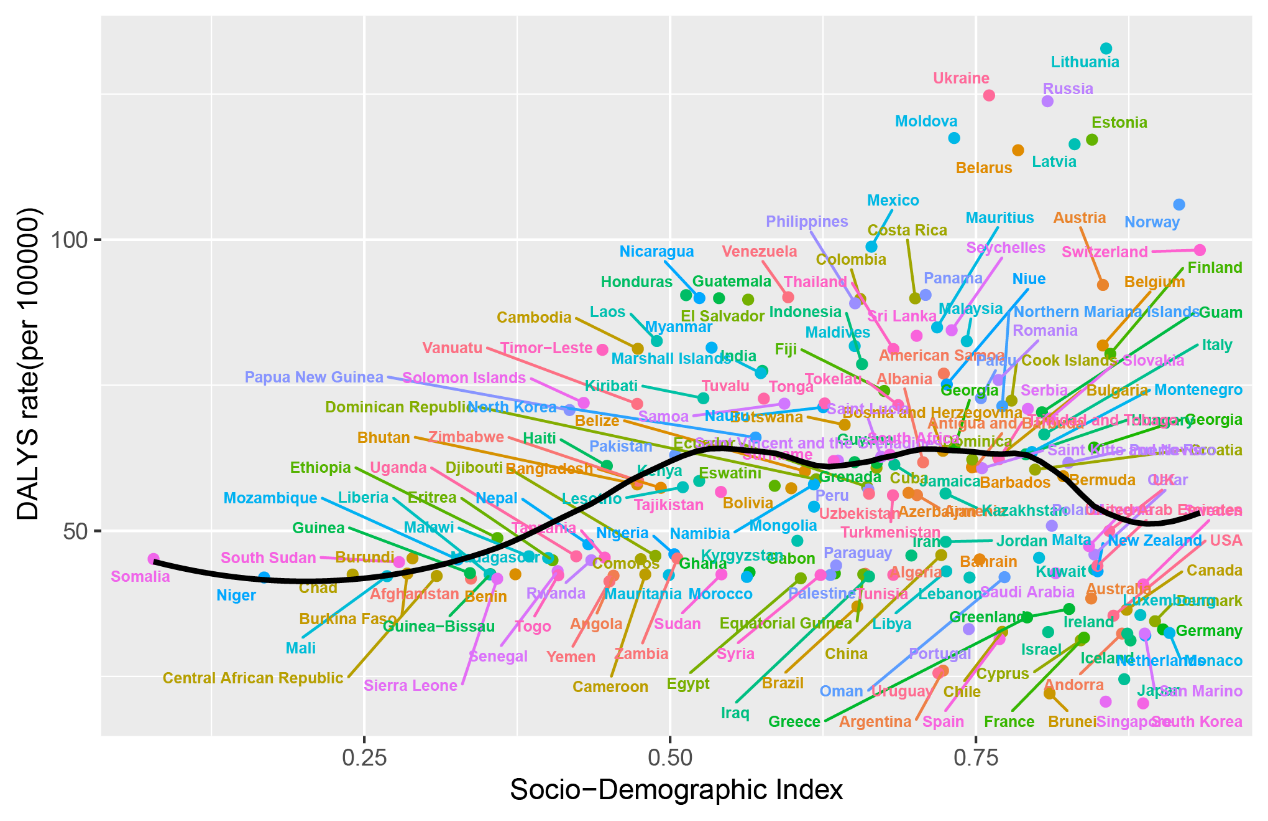


**Figure S18.** The associations between the SDI and DALYs rates per 100,000 population of benign prostatic hyperplasia across 204 countries. SDI = Socio-Demographic Index, GBD = Global Burden of Disease


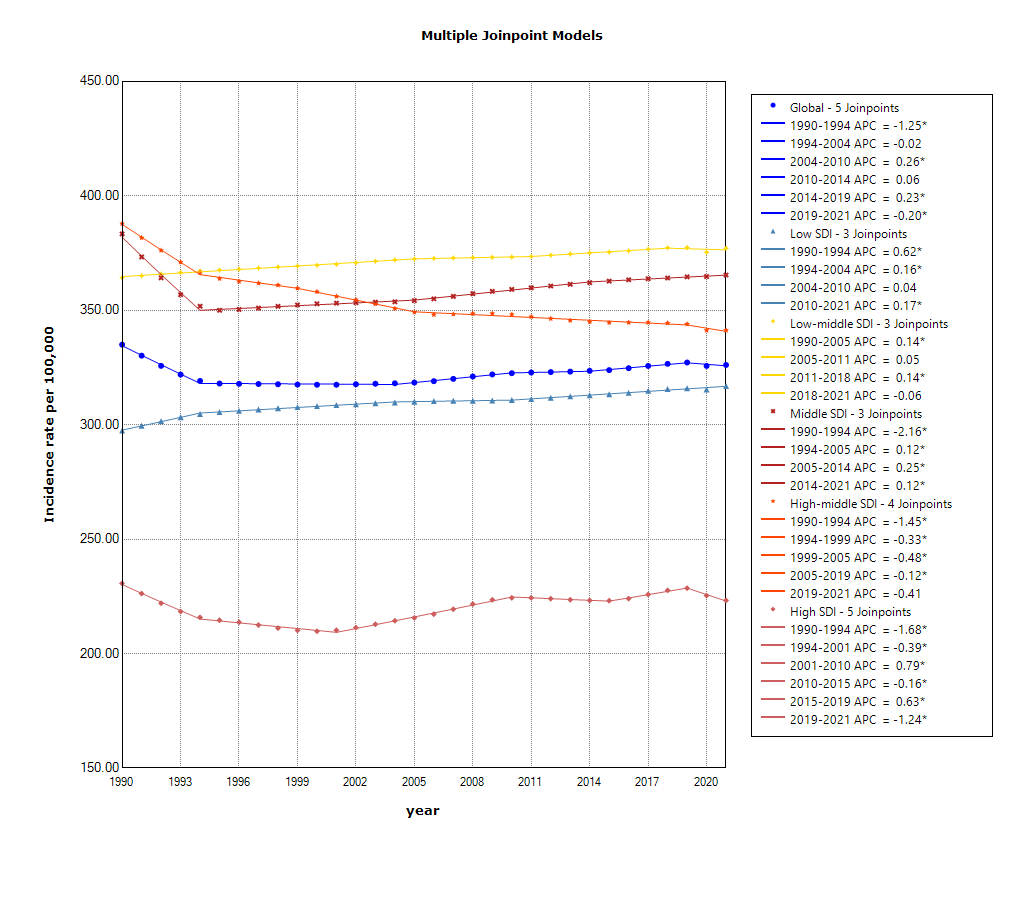


**Figure S19.** The trends ASIR of benign prostatic hyperplasia in global and 5 SDI regions from 1990 to 2021. ASIR = Age-standardized incidence rate (*: p<0.05).


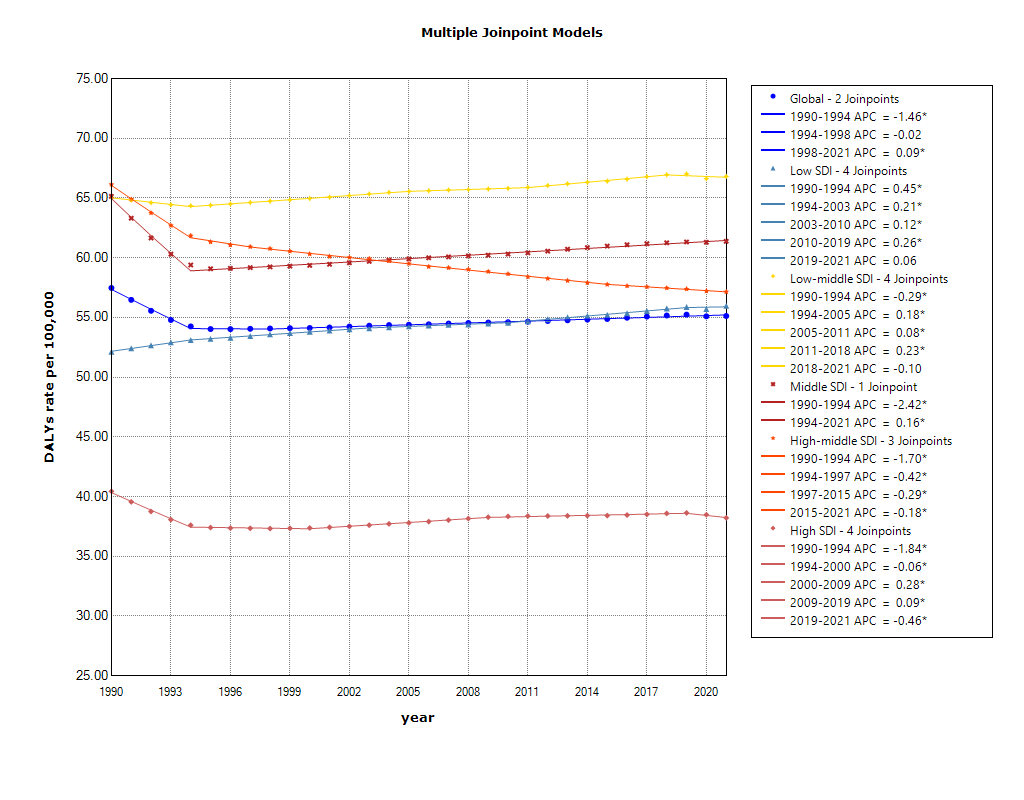


**Figure S20.** The trends of ASDR of benign prostatic hyperplasia in global and 5 SDI regions from 1990 to 2021. ASDR = Age-standardized DALYs rate (*: p<0.05).
