# Supplementary material for: Global, Regional, and National Burden of Benign Prostatic Hyperplasia: A Comprehensive Analysis from 1990 to 2021
Source: Research Square preprint supplement (doi:10.21203/rs.3.rs-5011206/v1), 2024-12-16
Supplement: Supplementary file 2 [file c432440fc3c43292664d55d8.docx]

| **Table S1 The prevalence of benign prostatic hyperplasia cases and rates in 1990 and 2021, and the trends from 1990 to 2021** | | | | | | |
| --- | --- | --- | --- | --- | --- | --- |
| **location** | **Prevalent cases** | | | **Prevalent rates** | | |
| **1990_thousand (95% UI)** | **2021_thousand (95% UI)** | **percentage change (100%)** | **1990_per 100 000(95% UI)** | **2021_per 100 000(95% UI)** | **EAPC (95% CI)** |
| Global | 50705.8 (38735.5-65693.4) | 112502 (88131.8-142634.2) | 1.219 | 2899.8 (2240-3682.6) | 2782.6 (2191.6-3508) | -0.008 (-0.056-0.041) |
| Low SDI | 2845.9 (2116.5-3858.1) | 6457.4 (4850.5-8510.3) | 1.269 | 2651.5 (1995.1-3512) | 2837.3 (2142.2-3708) | 0.18 (0.167-0.193) |
| Low-middle SDI | 9518.1 (7111-12599.6) | 22260.1 (16670.8-28973.3) | 1.339 | 3300.7 (2462.6-4294.2) | 3388.6 (2569.1-4372.1) | 0.118 (0.107-0.129) |
| Middle SDI | 14745.3 (11131.2-19256) | 38637 (29829.5-49336) | 1.620 | 3282.2 (2531-4187.8) | 3097.5 (2433.5-3911.5) | 0.018 (-0.06-0.096) |
| High-middle SDI | 13845.1 (10636.5-17767.8) | 26259.4 (20504.2-33079.1) | 0.897 | 3335.9 (2606-4198.2) | 2881.3 (2275.3-3621.7) | -0.376 (-0.421--0.331) |
| High SDI | 9685.8 (7699-12190.3) | 18779.4 (15540.5-22785.8) | 0.939 | 2036.6 (1630.3-2549.7) | 1928 (1605-2322.8) | 0.03 (-0.038-0.097) |
| High-income Asia Pacific | 1128.4 (844.9-1513.3) | 2420.2 (1870.4-3134.5) | 1.145 | 1296.9 (979.4-1724.4) | 1167.8 (902.1-1524.9) | -0.154 (-0.225--0.083) |
| High-income North America | 2725.8 (2193.9-3342.1) | 5552.6 (4852.9-6346.9) | 1.037 | 1829.9 (1479.6-2225.3) | 1818.9 (1599.1-2062.7) | 0.243 (0.171-0.314) |
| Western Europe | 5379.7 (4301.3-6726.2) | 9436 (7730.9-11590.2) | 0.754 | 2176.6 (1746.6-2711) | 2269.2 (1864.7-2771.6) | 0.198 (0.169-0.227) |
| Australasia | 214 (159.4-286.7) | 520.5 (384.5-684.7) | 1.432 | 1978.4 (1492-2639.1) | 1979.8 (1482.2-2581.4) | 0.03 (-0.007-0.066) |
| Andean Latin America | 258.9 (192.3-348.8) | 790.9 (582.3-1037.1) | 2.055 | 2790.9 (2076.3-3700.9) | 2877.2 (2127.2-3752.3) | 0.147 (0.113-0.182) |
| Tropical Latin America | 934.4 (780.7-1138.1) | 2170.6 (1812.6-2656.1) | 1.323 | 2323.6 (1928.6-2823.1) | 1892.2 (1570.6-2306.7) | -0.316 (-0.431--0.2) |
| Central Latin America | 1735.8 (1362.6-2176.5) | 5373.6 (4241.6-6693.4) | 2.096 | 4703.4 (3696-5862.6) | 4775 (3770.5-5939.4) | 0.119 (0.087-0.152) |
| Southern Latin America | 265.2 (200.3-348.4) | 547 (402.2-725.5) | 1.063 | 1292.2 (984-1703.5) | 1404.1 (1037.7-1852.8) | 0.334 (0.289-0.379) |
| Caribbean | 360.3 (266.6-476.8) | 768.6 (565.4-1002) | 1.133 | 2910.4 (2157.5-3849.9) | 3060.8 (2253.5-3991.3) | 0.193 (0.178-0.209) |
| Central Europe | 2322.8 (1831.7-2915.8) | 3164.2 (2622.2-3834.8) | 0.362 | 3671.8 (2900.9-4562.4) | 3222 (2698.6-3878) | -0.147 (-0.255--0.039) |
| Eastern Europe | 5859.5 (4455.5-7564.7) | 8497 (6448.4-10798.5) | 0.450 | 6282.7 (4855.1-7873.7) | 6262.2 (4821.1-7834.3) | -0.002 (-0.017-0.013) |
| Central Asia | 471.6 (346.7-626.8) | 943.3 (708.9-1243.7) | 1.000 | 2753.1 (2059.4-3600) | 2826.9 (2151.5-3627.8) | 0.048 (0.03-0.066) |
| North Africa and Middle East | 1654.2 (1221.9-2266.7) | 4705.5 (3471.2-6338.8) | 1.845 | 2068.8 (1547.4-2741.6) | 2168.6 (1598.2-2888.4) | 0.134 (0.126-0.143) |
| South Asia | 9537.5 (7049-12680.8) | 26115.7 (19277.2-33966.8) | 1.738 | 3414.3 (2525.8-4455.6) | 3749 (2817.4-4827.6) | 0.221 (0.19-0.251) |
| Southeast Asia | 5134.1 (3841.5-6656.1) | 12223.9 (9320.3-15812.2) | 1.381 | 4691.9 (3557.7-5984.5) | 4189.6 (3228.5-5327.3) | -0.126 (-0.221--0.031) |
| East Asia | 10392.8 (7591.1-13752) | 24304 (18921.9-31611.3) | 1.339 | 2908.3 (2165.6-3765.4) | 2361.9 (1862.5-2997.8) | -0.234 (-0.392--0.075) |
| Oceania | 43.8 (32.3-58.4) | 117.4 (88.9-153.5) | 1.680 | 3494.3 (2632.4-4480.7) | 3632.8 (2754.1-4576.2) | 0.139 (0.127-0.151) |
| Western Sub-Saharan Africa | 918 (674.2-1252.9) | 1888.9 (1394-2554) | 1.058 | 2188 (1620.4-2936.1) | 2210.8 (1638.3-2941.6) | 0.011 (0.001-0.021) |
| Eastern Sub-Saharan Africa | 828.9 (608.6-1127) | 1754.6 (1294.7-2374.5) | 1.117 | 2393.9 (1784.8-3200.3) | 2421.3 (1784.7-3225.8) | 0.011 (-0.003-0.026) |
| Central Sub-Saharan Africa | 203.7 (149-280.1) | 475.6 (350.2-653.2) | 1.335 | 2107.1 (1553.6-2837.5) | 2143.1 (1599-2845.6) | 0.032 (0.018-0.045) |
| Southern Sub-Saharan Africa | 336.5 (250.8-454.9) | 731.8 (544.8-998.2) | 1.175 | 3049.4 (2294.8-4079.4) | 3166.5 (2376-4202.8) | 0.119 (0.099-0.14) |

| **Table S2. The Incidence of benign prostatic hyperplasia cases and rates in 1990 and 2021, and the trends from 1990 to 2021** | | | | | | |
| --- | --- | --- | --- | --- | --- | --- |
| **location** | **Incident cases** | | | **Incident rates** | | |
| **1990_thousand (95% UI)** | **2021_thousand (95% UI)** | **percentage change (100%)** | **1990_per 100 000 (95% UI)** | **2021_per 100 000 (95% UI)** | **EAPC (95% CI)** |
| Global | 6406 (4999.9-7994.8) | 13787.6 (10907.9-17015) | 1.152 | 335 (262.3-414.7) | 326.1 (258.9-400.3) | 0.033 (-0.017-0.082) |
| Low SDI | 359.3 (273.6-466.7) | 810.2 (623.5-1024.2) | 1.255 | 297.5 (227.6-379.2) | 317 (244.6-400.5) | 0.156 (0.139-0.172) |
| Low-middle SDI | 1173.1 (909.8-1483.4) | 2705.2 (2093.7-3405.2) | 1.306 | 364.3 (283.1-453.7) | 377.1 (292.2-470.6) | 0.107 (0.101-0.114) |
| Middle SDI | 1961.6 (1511.6-2480.7) | 4925 (3869.3-6110.2) | 1.511 | 383.4 (296.8-477.5) | 365.4 (287.7-451.2) | 0.044 (-0.031-0.118) |
| High-middle SDI | 1777.7 (1380.1-2218.3) | 3250.6 (2558.3-4012) | 0.829 | 387.9 (304.5-477.5) | 341.3 (270.7-417.6) | -0.324 (-0.373--0.275) |
| High SDI | 1126.2 (902.1-1385.5) | 2083.5 (1716.9-2523.2) | 0.850 | 230.7 (185-283.1) | 223.2 (185.4-269.3) | 0.146 (0.052-0.24) |
| High-income Asia Pacific | 142.1 (107.6-185.5) | 252.8 (194.4-331.2) | 0.779 | 149.8 (113.5-194.9) | 138.2 (106.2-179.7) | -0.081 (-0.176-0.013) |
| High-income North America | 298.2 (243.1-361.2) | 647 (544.1-757.9) | 1.170 | 200.5 (164.6-240.8) | 216.2 (183.9-251.1) | 0.470 (0.381-0.559) |
| Western Europe | 587.9 (468.3-725.3) | 917.9 (737.8-1121.3) | 0.561 | 237.5 (190.6-291.6) | 241.6 (197-291.9) | 0.375 (0.252-0.499) |
| Australasia | 26.7 (20.3-35.2) | 59.4 (44.2-77.3) | 1.225 | 237.5 (181.2-310.9) | 238.8 (181.6-306.1) | 0.102 (0.004-0.199) |
| Andean Latin America | 32.4 (24.7-42) | 96.5 (72.6-123) | 1.978 | 326 (248-417.7) | 338.5 (255.4-429.2) | 0.184 (0.149-0.219) |
| Tropical Latin America | 117.9 (96.3-144.1) | 269.4 (221.9-332.6) | 1.285 | 266.7 (217.6-325.6) | 222.9 (183-273.8) | -0.249 (-0.362--0.135) |
| Central Latin America | 206.2 (164-253.3) | 622.2 (495.4-765.5) | 2.017 | 511.9 (404.5-626.4) | 522.1 (416.8-639.2) | 0.148 (0.12-0.177) |
| Southern Latin America | 32.4 (24.6-41.8) | 64.5 (48.9-83.1) | 0.991 | 151.2 (115.5-193.6) | 164.4 (124.7-211.3) | 0.379 (0.278-0.48) |
| Caribbean | 43.6 (32.9-55.7) | 92.8 (71.4-118) | 1.128 | 343.5 (259.9-438.5) | 361.2 (277.1-456.1) | 0.215 (0.191-0.239) |
| Central Europe | 288.5 (230.4-352.3) | 371.4 (301.6-441.7) | 0.287 | 421.7 (338.8-510.1) | 376.6 (310.5-445.1) | -0.215 (-0.275--0.155) |
| Eastern Europe | 720.6 (564.4-900.1) | 959.3 (752.1-1175.4) | 0.331 | 662.4 (525.4-796.9) | 661.1 (527.1-792.2) | -0.021 (-0.047-0.005) |
| Central Asia | 61.9 (46.7-80.2) | 126.1 (96-162.3) | 1.037 | 322.9 (246.4-412.1) | 330 (255-415.9) | 0.021 (-0.007-0.05) |
| North Africa and Middle East | 212.3 (161.3-276) | 604.2 (463.2-775.9) | 1.846 | 238.9 (182.3-306.4) | 250.2 (191.4-319.9) | 0.126 (0.115-0.137) |
| South Asia | 1176.8 (898.1-1497.4) | 3125.6 (2407.6-3942.4) | 1.656 | 373.1 (288.8-469.2) | 412.9 (319.9-516.1) | 0.205 (0.164-0.247) |
| Southeast Asia | 637.3 (498.7-790.4) | 1540 (1210.5-1920.9) | 1.416 | 512.5 (402.2-630.3) | 467.4 (367.6-577.9) | -0.105 (-0.183--0.027) |
| East Asia | 1525.5 (1133.2-1968.7) | 3395.8 (2603.9-4245.9) | 1.226 | 365.7 (276.5-465) | 303.5 (236.8-380.2) | -0.208 (-0.35--0.064) |
| Oceania | 6.3 (4.8-8.1) | 16.7 (12.8-21.2) | 1.651 | 423.3 (324-530.6) | 437.7 (333.9-548.8) | 0.117 (0.101-0.133) |
| Western Sub-Saharan Africa | 116.6 (88.9-151) | 241.5 (185.4-309.7) | 1.071 | 248.5 (189-319.8) | 250.9 (191.9-320.2) | 0.001 (-0.01-0.012) |
| Eastern Sub-Saharan Africa | 105.6 (79.8-137.3) | 228.8 (175.1-294.5) | 1.167 | 272.2 (207.5-345.7) | 275.7 (209.1-352.6) | 0.016 (0.002-0.03) |
| Central Sub-Saharan Africa | 26.8 (20.2-35.2) | 66.1 (49.1-87.7) | 1.466 | 241.8 (182.9-314) | 246.3 (187.3-323) | 0.032 (0.019-0.045) |
| Southern Sub-Saharan Africa | 40.4 (30.7-51.6) | 89.4 (68.5-116.3) | 1.213 | 331.1 (253.7-418.7) | 342.7 (265.2-433.8) | 0.108 (0.089-0.127) |
|  |  |  |  |  |  |  |

| **Table S3. The DALYs of benign prostatic hyperplasia cases and rates in 1990 and 2021, and the trends from 1990 to 2021** | | | | | | |
| --- | --- | --- | --- | --- | --- | --- |
| **location** | **DALYs cases** | | | **DALYs rates** | | |
| **1990_thousand (95% UI)** | **2021_thousand (95% UI)** | **percentage change (100%)** | **1990_per 100 000 (95% UI)** | **2021_per 100 000 (95% UI)** | **EAPC (95% CI)** |
| Global | 1011.1 (605.8-1555.9) | 2235.7 (1345.7-3402.6) | 1.211 | 57.5 (34.6-87.8) | 55.1 (33.2-83.5) | -0.003 (-0.053-0.047) |
| Low SDI | 56.5 (33.4-86.8) | 128.5 (77-198.9) | 1.274 | 52.1 (30.9-81.1) | 56 (33.2-87.2) | 0.202 (0.192-0.212) |
| Low-middle SDI | 189.1 (114.4-287.4) | 441.6 (263.6-685.2) | 1.335 | 65.1 (38.8-99.6) | 66.8 (40-102.8) | 0.129 (0.116-0.143) |
| Middle SDI | 295.2 (174.9-458.1) | 769.6 (459.7-1179.4) | 1.607 | 65.1 (39-98.4) | 61.4 (36.7-92.5) | 0.018 (-0.060-0.097) |
| High-middle SDI | 276.1 (165.5-422.1) | 522.4 (311.5-792.3) | 0.892 | 66.1 (39.9-99.8) | 57.2 (34-86) | -0.367 (-0.414--0.32) |
| High SDI | 192.8 (118.1-294.1) | 371.5 (233.7-558.8) | 0.927 | 40.5 (24.8-61.4) | 38.2 (24.2-57.3) | 0.025 (-0.042-0.091) |
| High-income Asia Pacific | 22.6 (13.4-35.7) | 48.2 (29.5-76.2) | 1.133 | 25.8 (15.3-41.2) | 23.4 (14.2-37.3) | -0.134 (-0.205--0.062) |
| High-income North America | 54 (34.3-81.5) | 108.3 (68.3-158.3) | 1.006 | 36.2 (23.1-54.5) | 35.5 (22.5-51.9) | 0.201 (0.129-0.272) |
| Western Europe | 107.6 (66.9-165.4) | 188.5 (120.2-286.5) | 0.752 | 43.5 (27.1-66.8) | 45.5 (28.9-68.6) | 0.209 (0.18-0.238) |
| Australasia | 4.2 (2.6-6.7) | 10.3 (6.1-15.8) | 1.452 | 39 (23.6-61) | 39.1 (23.6-61) | 0.032 (-0.004-0.068) |
| Andean Latin America | 5.2 (3-8.3) | 15.8 (9.3-24.9) | 2.038 | 55.8 (32.4-88.7) | 57.3 (33.8-90.7) | 0.138 (0.103-0.173) |
| Tropical Latin America | 18.4 (11.7-27.7) | 42.8 (27.2-65) | 1.326 | 45.6 (28.7-68.7) | 37.2 (23.6-56.3) | -0.311 (-0.427--0.195) |
| Central Latin America | 34.4 (21.5-52.1) | 106.6 (66.6-162.2) | 2.099 | 92.7 (58.1-140.3) | 94.5 (59-143.9) | 0.126 (0.096-0.156) |
| Southern Latin America | 5.3 (3.2-8.2) | 10.9 (6.6-17.1) | 1.057 | 25.8 (15.4-39.8) | 28 (16.9-43.6) | 0.325 (0.28-0.37) |
| Caribbean | 7.2 (4.3-11.4) | 15.3 (9.2-24) | 1.125 | 58.2 (34.5-92) | 60.7 (36.7-95.7) | 0.171 (0.155-0.188) |
| Central Europe | 45.8 (28.3-69.3) | 62.5 (39.8-94.7) | 0.365 | 72.1 (43.9-108) | 63.6 (40.5-95.4) | -0.126 (-0.233--0.019) |
| Eastern Europe | 116.1 (70.8-176.4) | 168.2 (101.1-254.1) | 0.449 | 123.7 (75.8-186) | 123.6 (75.4-185.1) | 0.021 (0.003-0.040) |
| Central Asia | 9.5 (5.6-14.6) | 19 (11.3-29.4) | 1.000 | 55 (32.1-84.9) | 56.5 (33.3-86.5) | 0.050 (0.032-0.068) |
| North Africa and Middle East | 33.1 (19.5-51.9) | 93.7 (56.4-146.3) | 1.831 | 41.1 (24.3-65.1) | 42.8 (25.5-67.5) | 0.118 (0.111-0.126) |
| South Asia | 188.8 (114.1-285.7) | 516.5 (311.5-794.3) | 1.736 | 67 (40-102.9) | 73.7 (44.3-113) | 0.240 (0.211-0.268) |
| Southeast Asia | 103.1 (62-157.7) | 245.6 (148.1-376.8) | 1.382 | 93.4 (56.3-141.9) | 83.5 (50.2-127.6) | -0.117 (-0.212--0.023) |
| East Asia | 209.1 (120.7-321.6) | 484.1 (284.5-737.4) | 1.315 | 57.9 (33.6-88.8) | 46.8 (27.9-70.9) | -0.247 (-0.406--0.087) |
| Oceania | 0.9 (0.5-1.4) | 2.3 (1.4-3.5) | 1.556 | 68.7 (40.7-105) | 71.3 (43.1-107.3) | 0.143 (0.129-0.156) |
| Western Sub-Saharan Africa | 18.4 (10.8-28.4) | 38 (22.5-58.6) | 1.065 | 43.4 (25.8-68.3) | 44.1 (26-69.5) | 0.040 (0.030-0.050) |
| Eastern Sub-Saharan Africa | 16.5 (9.9-25.9) | 35.2 (21.1-54.8) | 1.133 | 47.3 (28-74.5) | 48.1 (28.6-75.8) | 0.036 (0.025-0.047) |
| Central Sub-Saharan Africa | 4 (2.4-6.2) | 9.5 (5.6-14.6) | 1.375 | 41.4 (24.3-64.9) | 42.3 (25.4-66.3) | 0.057 (0.046-0.068) |
| Southern Sub-Saharan Africa | 6.7 (4-10.6) | 14.5 (8.8-22.5) | 1.164 | 60.7 (36-94.8) | 62.5 (37.5-97) | 0.100 (0.080-0.120) |
|  |  |  |  |  |  |  |

| **Table S4. The prevalence of benign prostatic hyperplasia cases and rates in 1990 and 2021 across 204 countries, and the trends from 1990 to 2021** | | | | | | |
| --- | --- | --- | --- | --- | --- | --- |
| **location** | **Prevalent cases** | | | **Prevalent rates** | | |
| **1990 (95% UI)** | **2021 (95% UI)** | **percentage change (100%)** | **1990_per 100 000 (95% UI)** | **2021_per 100 000 (95% UI)** | **EAPC (95% CI)** |
| Afghanistan | 74666 (54651.7-100022.6) | 76949.6 (57460.3-100129.1) | 0.031 | 2055.6 (1511.6-2690.7) | 2166 (1609.4-2823.4) | 0.152 (0.141-0.162) |
| Albania | 27349.6 (20342.4-36397.7) | 68808.3 (50636.1-90661.1) | 1.516 | 2977.7 (2217-3854.9) | 3110.2 (2304.3-4061.7) | 0.101 (0.077-0.125) |
| Algeria | 121387.6 (89434-164034.6) | 380902.4 (277748.8-507217.2) | 2.138 | 2041.8 (1514.8-2719.3) | 2151.7 (1583.9-2861.1) | 0.139 (0.126-0.153) |
| American Samoa | 347.8 (258.3-454.7) | 879.7 (659.2-1158.1) | 1.529 | 3674.9 (2773.1-4777.5) | 3946.3 (3027.7-5144.3) | 0.238 (0.219-0.257) |
| Andorra | 458.1 (328.4-605.6) | 1268.2 (917.8-1663.4) | 1.768 | 1513.9 (1090.5-1987.4) | 1609 (1163.1-2122.6) | 0.286 (0.254-0.319) |
| Angola | 35951.5 (26581.9-49757.9) | 100858.4 (74462.6-137597.4) | 1.805 | 2098.8 (1559.2-2814.9) | 2145.6 (1612.7-2831.8) | 0.04 (0.026-0.053) |
| Antigua and Barbuda | 690.7 (512-914.7) | 1569.9 (1144.8-2128) | 1.273 | 2913.7 (2159.6-3809) | 3091.2 (2268.7-4145.2) | 0.22 (0.205-0.235) |
| Argentina | 176367.4 (128945.3-236487.6) | 324025.8 (237422.7-433543.8) | 0.837 | 1227.3 (904-1631.2) | 1303.5 (963.1-1733.5) | 0.25 (0.204-0.297) |
| Armenia | 29468.3 (21365.6-39531.6) | 52653.6 (38807-69503.6) | 0.787 | 2752 (2029.9-3576.2) | 2811.3 (2084.3-3688) | 0.067 (0.043-0.09) |
| Australia | 168454.4 (120439.3-231069.9) | 429893.2 (307366.8-579306.7) | 1.552 | 1867.3 (1352.6-2539.9) | 1943.7 (1398.2-2610.2) | 0.122 (0.103-0.142) |
| Austria | 160558.6 (115720.1-208416.9) | 373477 (337974.7-409626.7) | 1.326 | 3500.3 (2518.5-4536.5) | 4602.8 (4151.2-5051.7) | 0.568 (0.449-0.688) |
| Azerbaijan | 50021.5 (36786.5-65818.9) | 121211.4 (89720.2-163592.1) | 1.423 | 2749.3 (2035.6-3612.7) | 2815.1 (2104.4-3686.6) | 0.07 (0.051-0.089) |
| Bahamas | 1802.8 (1300.9-2413.3) | 5407.7 (3971.4-7339.5) | 2.000 | 2921.7 (2126.6-3947.1) | 3073.9 (2292.7-4132.9) | 0.182 (0.163-0.2) |
| Bahrain | 1758.8 (1300.7-2382.8) | 11849.5 (8685.8-16164.1) | 5.737 | 2121.3 (1575.9-2783.7) | 2304.7 (1691.4-3046.7) | 0.225 (0.209-0.242) |
| Bangladesh | 679772.7 (501625-909741.1) | 2049417.3 (1499990.3-2705808.4) | 2.015 | 2779.2 (2051.8-3707.9) | 2878.7 (2127.4-3762.6) | 0.124 (0.118-0.13) |
| Barbados | 3730.1 (2761-4907.9) | 7533.3 (5529.3-9838) | 1.020 | 2921.2 (2157.6-3814.5) | 3065.5 (2262.7-3984.4) | 0.181 (0.163-0.199) |
| Belarus | 265395.3 (202028.1-342091.5) | 356364.9 (271115.1-460153.8) | 0.343 | 5872 (4478.9-7451.9) | 5836.7 (4523.1-7414.7) | -0.005 (-0.022-0.013) |
| Belgium | 254372.8 (154264.4-322545) | 436964.9 (282726.9-544074) | 0.718 | 3826.3 (2335-4843.6) | 4096 (2675.6-5106) | 0.307 (0.262-0.352) |
| Belize | 1280.6 (939-1690.6) | 4281.1 (3179.5-5808.5) | 2.343 | 2852.2 (2099.6-3781) | 3024.7 (2248-4062.7) | 0.22 (0.202-0.238) |
| Benin | 19349.7 (14532-26386.9) | 47229.5 (35089.5-64440) | 1.441 | 2091.8 (1579.5-2852.9) | 2137.6 (1595-2847.4) | 0.053 (0.04-0.066) |
| Bermuda | 752.8 (545.2-1000.1) | 1878.7 (1388.2-2527.7) | 1.496 | 2853 (2079.9-3761.8) | 2987.2 (2216.8-4023.1) | 0.169 (0.152-0.185) |
| Bhutan | 3017.4 (2238.7-4041.8) | 8630.9 (6502.6-11236.6) | 1.860 | 2771.2 (2083.8-3629.3) | 2905.1 (2173.5-3788.1) | 0.149 (0.14-0.159) |
| Bolivia (Plurinational State of) | 38158.3 (27780.4-50309.3) | 120911.6 (86868.2-162792.5) | 2.169 | 2737.4 (2023.9-3616.8) | 2895.4 (2096.6-3848.1) | 0.189 (0.172-0.206) |
| Bosnia and Herzegovina | 49162.4 (36799.1-64422.6) | 92012.6 (68279.8-120249.7) | 0.872 | 3023.5 (2254.9-3939.9) | 3237.5 (2417.6-4172.1) | 0.209 (0.182-0.236) |
| Botswana | 8080.1 (6009.7-10447.9) | 20750 (15390.8-26673.5) | 1.568 | 3360.3 (2550.2-4255.9) | 3458.5 (2604.5-4392.1) | 0.104 (0.09-0.117) |
| Brazil | 912976.4 (764147.9-1111662.8) | 2111128.5 (1763868.4-2572964) | 1.312 | 2328.1 (1935.2-2822.2) | 1884.2 (1566.6-2287.8) | -0.326 (-0.445--0.208) |
| Brunei Darussalam | 495.8 (349-671.3) | 1782.1 (1260.4-2431.9) | 2.594 | 1075.8 (754.3-1442.5) | 1118.1 (793.6-1489) | 0.121 (0.108-0.135) |
| Bulgaria | 175896.2 (131901.2-232278.8) | 199998.2 (147858.1-260836.4) | 0.137 | 3008.5 (2254.2-3893.7) | 3171.2 (2387.9-4115.6) | 0.121 (0.092-0.151) |
| Burkina Faso | 41915.2 (31118.2-56873.6) | 87306.5 (64925.7-115296.6) | 1.083 | 2093.6 (1580.9-2803.7) | 2133.9 (1594.3-2811.7) | 0.044 (0.037-0.05) |
| Burundi | 22602.7 (16657.5-30349.4) | 52426.3 (38177.5-71341.5) | 1.319 | 2272.7 (1670.8-3023.1) | 2265.2 (1654.4-3008.6) | -0.026 (-0.043--0.008) |
| Cabo Verde | 2106.5 (1538.9-2794.6) | 3857.7 (2892.7-5131.5) | 0.831 | 2086.4 (1537-2770.2) | 2159 (1597.1-2827) | 0.089 (0.075-0.103) |
| Cambodia | 68524.8 (50518-90345.2) | 196735.3 (146191.7-256737.3) | 1.871 | 3954.1 (2962.7-5128.9) | 4103.6 (3045.8-5280.6) | 0.102 (0.088-0.115) |
| Cameroon | 42294.2 (31454.2-55946.2) | 118302.7 (87315.9-160379.1) | 1.797 | 2082.9 (1531.8-2756.1) | 2133 (1590.5-2820) | 0.06 (0.051-0.07) |
| Canada | 249237.7 (183341.2-330222.7) | 621443.2 (467630.3-810637.3) | 1.493 | 1742.7 (1292-2283) | 1828.3 (1373.4-2342.1) | 0.237 (0.195-0.279) |
| Central African Republic | 9951.3 (7209.8-13682.2) | 18373.1 (13454.5-25449.2) | 0.846 | 2106.4 (1569.4-2781.4) | 2156.6 (1604.1-2873.1) | 0.04 (0.027-0.052) |
| Chad | 28208 (20451.9-37747.6) | 62352.7 (45907.1-84829.1) | 1.210 | 2092.7 (1524.2-2776.5) | 2134.8 (1566.6-2861.7) | 0.043 (0.034-0.051) |
| Chile | 67614.8 (49326.4-92277.6) | 193019.2 (141388.2-262452.5) | 1.855 | 1539.5 (1133.3-2076) | 1640.9 (1206.6-2214.4) | 0.281 (0.242-0.321) |
| China | 9940459.3 (7241435.2-13182439.7) | 23111197.5 (18003854.2-30074671.4) | 1.325 | 2880.3 (2141.1-3730.6) | 2315.2 (1822.2-2946.6) | -0.242 (-0.411--0.074) |
| Colombia | 338842.4 (252543.5-441642.6) | 1110782.2 (830372.4-1436266.2) | 2.278 | 4332 (3257.9-5609.9) | 4515.1 (3395-5779.6) | 0.143 (0.133-0.152) |
| Comoros | 2047.1 (1509.1-2778.6) | 4765.2 (3553.9-6330.4) | 1.328 | 2265.4 (1676.1-3014.1) | 2267.7 (1688.3-2989.2) | -0.012 (-0.024-0.001) |
| Congo | 9196 (6739.3-12594.8) | 25253.5 (18780.3-33933) | 1.746 | 2116.6 (1564.1-2834) | 2158.9 (1594.5-2876.1) | 0.025 (0.012-0.038) |
| Cook Islands | 212.4 (159.2-279.5) | 480.2 (358.2-629.1) | 1.261 | 3511.6 (2662.6-4507.4) | 3690.3 (2775.7-4784.5) | 0.18 (0.171-0.19) |
| Costa Rica | 34710.5 (25462.4-45233) | 114142 (83685.2-148022.1) | 2.288 | 4313.6 (3178-5595.5) | 4545.5 (3354.5-5881.5) | 0.181 (0.169-0.193) |
| Côte d'Ivoire | 39894.2 (30002.1-54314.7) | 112530.5 (82453-151073.3) | 1.821 | 2091.8 (1579.5-2852.9) | 2135.3 (1566.6-2813.4) | 0.006 (-0.075-0.088) |
| Croatia | 77095 (66549.4-88126.4) | 122146.2 (105464.8-141609.6) | 0.584 | 3266.8 (2855.2-3734.8) | 3056.9 (2640.3-3525.8) | 0.172 (0.155-0.189) |
| Cuba | 148381.1 (109498.8-195843.2) | 281244.5 (207086.8-370279.1) | 0.895 | 2919.5 (2158.3-3845.8) | 3052.7 (2243.7-4031.4) | 0.11 (0.096-0.123) |
| Cyprus | 6137.8 (5052.7-7467.7) | 16192.3 (13029.5-19308.9) | 1.638 | 1500.9 (1237.4-1817.6) | 1554.4 (1252.5-1845.6) | 0.231 (0.212-0.251) |
| Czechia | 218312.2 (167665.1-272300.4) | 409234.4 (312613-500690.4) | 0.875 | 3842.4 (2995.9-4721.2) | 4171 (3228-5085.5) | 0.043 (0.031-0.054) |
| Democratic People's Republic of Korea | 150396.9 (111619.5-195909.8) | 384945.9 (288208.6-503779.9) | 1.560 | 3214.6 (2417.9-4131.4) | 3298.1 (2516.5-4261.1) | 0.097 (0.09-0.103) |
| Democratic Republic of the Congo | 141651.6 (103518-193160.7) | 316770.7 (232946.5-433621.6) | 1.236 | 2108.3 (1545.4-2832.5) | 2139.4 (1597.4-2842.4) | 0.028 (0.014-0.042) |
| Denmark | 57642.9 (39872.1-81457.2) | 97656.2 (67010.1-136621.2) | 0.694 | 1613.5 (1127-2273.6) | 1710.7 (1180.4-2380.9) | 0.318 (0.268-0.368) |
| Djibouti | 1341.6 (979.5-1823.4) | 7127.8 (5276.5-9525.8) | 4.313 | 2255.8 (1671.9-2980.1) | 2286.3 (1681.6-2981.7) | 0.006 (-0.01-0.022) |
| Dominica | 702.6 (513.2-925.9) | 1280.4 (924.7-1747.4) | 0.822 | 2926.4 (2160.8-3849.9) | 3140.9 (2298.2-4150.6) | 0.263 (0.244-0.282) |
| Dominican Republic | 49015.2 (35541.1-65662.3) | 137468.4 (101585.8-178640.3) | 1.805 | 2825 (2059.6-3750.8) | 2966.7 (2195-3860.9) | 0.197 (0.175-0.218) |
| Ecuador | 73391 (54661.7-98677.6) | 223593.4 (162858.4-295459) | 2.047 | 3010.3 (2240.7-4021.3) | 2906.5 (2128-3835.9) | 0.013 (-0.091-0.116) |
| Egypt | 254199.6 (189908.9-348649.1) | 675519.9 (488364.2-909105.7) | 1.657 | 2016.8 (1508.7-2696.7) | 2114.7 (1534-2801.1) | 0.129 (0.115-0.144) |
| El Salvador | 55898.2 (41807.1-74062.5) | 116847.2 (88472.1-151661.4) | 1.090 | 4268.8 (3197.7-5639.1) | 4550.1 (3429.5-5907.1) | 0.231 (0.223-0.24) |
| Equatorial Guinea | 1671.9 (1228.3-2291.9) | 4095.7 (3052.7-5541.4) | 1.450 | 2101.7 (1572.9-2813.5) | 2156.6 (1604.1-2873.1) | 0.049 (0.037-0.06) |
| Eritrea | 8728.4 (6439.9-11849.9) | 22003.9 (16085.1-29742.7) | 1.521 | 2255.1 (1686.1-2996.7) | 2281 (1653.2-3043) | -0.002 (-0.016-0.013) |
| Estonia | 41996.7 (31471.5-54930.9) | 60757.8 (46647.8-77474.8) | 0.447 | 5881.8 (4436.8-7555.9) | 5905.1 (4545.3-7500.3) | 0.03 (0.009-0.05) |
| Eswatini | 3239.7 (2401.6-4493) | 5931.3 (4313.3-8076.6) | 0.831 | 2845.5 (2149.8-3872.4) | 2941.4 (2151.5-3941.8) | 0.1 (0.084-0.117) |
| Ethiopia | 239009.7 (172714.5-325484.3) | 500213.5 (368465.1-670312.1) | 1.093 | 2472.1 (1839.2-3289) | 2462.9 (1813-3268.1) | -0.035 (-0.055--0.015) |
| Fiji | 5167.5 (3855.7-6773) | 12076.6 (8868.1-15923.1) | 1.337 | 3576.5 (2696.7-4597) | 3806.9 (2893.6-4871.8) | 0.216 (0.208-0.224) |
| Finland | 107479.2 (95766.2-120059.7) | 244795.4 (218567.2-270328.9) | 1.278 | 3854.2 (3439.2-4284) | 4053.3 (3628.8-4476.1) | 0.205 (0.191-0.22) |
| France | 528075.8 (384754.2-716767.4) | 970894.2 (698382.7-1291684.5) | 0.839 | 1504.7 (1104.8-2022.5) | 1584.7 (1154.8-2105.3) | 0.253 (0.218-0.288) |
| Gabon | 5276.1 (3897.4-7136.9) | 10221.8 (7528.8-14212.7) | 0.937 | 2110 (1576.6-2794.7) | 2165.9 (1619.2-2858.8) | 0.054 (0.04-0.068) |
| Gambia | 3566 (2618.9-4795) | 9216.8 (6760-12452.1) | 1.585 | 2084.6 (1545.9-2788.6) | 2124.9 (1566.6-2872.5) | 0.05 (0.036-0.064) |
| Georgia | 69805 (51262.4-91695.3) | 79030.5 (67894.3-92216.8) | 0.132 | 2973.7 (2222.4-3841) | 3236.1 (2790.5-3759.4) | 0.122 (0.052-0.193) |
| Germany | 751290.2 (544025-1016703.5) | 1438552.9 (1053385.5-1925877.8) | 0.915 | 1537.6 (1112.6-2072.9) | 1653.7 (1204.9-2212.1) | 0.336 (0.303-0.369) |
| Ghana | 58122.7 (42923.7-78131.4) | 144515.2 (107042-192800.8) | 1.486 | 2101 (1543.3-2784.7) | 2143.8 (1593.7-2793.9) | 0.064 (0.058-0.071) |
| Greece | 109666.2 (79377.4-147630.7) | 184116.6 (144095.3-230693.4) | 0.679 | 1519.8 (1107.2-2031) | 1751.3 (1382.1-2192.6) | 0.195 (0.099-0.29) |
| Greenland | 258.7 (184.9-344.3) | 699.4 (512.9-945.2) | 1.704 | 1730.3 (1299-2273.3) | 1837.1 (1376.4-2390.6) | 0.285 (0.242-0.328) |
| Grenada | 893.8 (660.9-1177.5) | 1679.5 (1222.7-2281.1) | 0.879 | 2923.1 (2161.9-3841.5) | 3128.9 (2301.9-4154.9) | 0.234 (0.219-0.249) |
| Guam | 1112.8 (811.8-1468.6) | 3473.2 (2605.2-4499.5) | 2.121 | 3435.8 (2575.5-4392.5) | 3525.5 (2667.2-4505.3) | 0.096 (0.08-0.111) |
| Guatemala | 67743.2 (49713-89095.1) | 229022.2 (170832.2-295371.7) | 2.381 | 4290 (3217.2-5530.7) | 4588.7 (3439.7-5912.9) | 0.251 (0.238-0.263) |
| Guinea | 34073.6 (24883.3-46179.6) | 58043.3 (42850.5-77597.6) | 0.703 | 2082.2 (1535.8-2807) | 2135.5 (1595.1-2820.5) | 0.045 (0.032-0.058) |
| Guinea-Bissau | 3791.7 (2792.2-5098.4) | 6241.4 (4628.4-8426) | 0.646 | 2086.4 (1537-2770.2) | 2132.7 (1593.6-2845.5) | 0.052 (0.04-0.063) |
| Guyana | 4949.9 (3633.3-6657.4) | 9042.8 (6569.8-12264.7) | 0.827 | 2962.9 (2187.9-3934.1) | 3163.3 (2326.7-4182.2) | 0.247 (0.228-0.266) |
| Haiti | 41964 (30703.4-55349.6) | 95167.8 (69425.7-127827.1) | 1.268 | 2918.3 (2145-3797) | 3096 (2265.5-4123.7) | 0.22 (0.208-0.232) |
| Honduras | 40242.6 (30080.1-52516.4) | 129368.2 (95942.8-169193.4) | 2.215 | 4342.7 (3260.5-5632.8) | 4592.4 (3433.9-5945.4) | 0.193 (0.183-0.202) |
| Hungary | 185010.9 (136484.4-243781.1) | 260761.3 (192773.1-337750.8) | 0.409 | 3031.1 (2246.5-3927.6) | 3198.2 (2398.3-4113.5) | 0.139 (0.11-0.169) |
| Iceland | 1928.2 (1411.5-2586.9) | 4412.8 (3143.7-6014.6) | 1.289 | 1452.5 (1066.5-1942) | 1547 (1109-2097.3) | 0.329 (0.282-0.376) |
| India | 7810475.5 (5781619.2-10403228.4) | 21904365.1 (16228654-28462313.1) | 1.804 | 3562.4 (2637.8-4639.9) | 3948.2 (2974.6-5071.2) | 0.221 (0.184-0.258) |
| Indonesia | 2384236.7 (1777525.4-3089878.6) | 4346737.7 (3370796.5-5635238.5) | 0.823 | 5586.8 (4289.1-7049.4) | 3945.3 (3077.2-5009.8) | -0.436 (-0.699--0.171) |
| Iran (Islamic Republic of) | 290184.3 (210263.6-400933.3) | 848238.7 (632114.6-1140284.1) | 1.923 | 2218.8 (1653.9-2965.1) | 2315.2 (1726.7-3094.4) | 0.122 (0.11-0.135) |
| Iraq | 73932.9 (55099.5-98707.9) | 233096.3 (170194.7-316366.5) | 2.153 | 2074.4 (1549.7-2759.7) | 2168.6 (1597-2910.2) | 0.099 (0.082-0.116) |
| Ireland | 28798.4 (20819.5-38423.8) | 61961.7 (44792.8-83452.8) | 1.152 | 1501.5 (1098-2004.9) | 1610.9 (1176.7-2145.9) | 0.326 (0.289-0.363) |
| Israel | 34450.9 (24791.3-46563.8) | 92528.3 (66680.1-124163.2) | 1.686 | 1520.5 (1101.3-2049.5) | 1620.2 (1175.6-2194.7) | 0.289 (0.257-0.32) |
| Italy | 1330578.8 (1090780.3-1648738.5) | 1988976.7 (1729060.5-2311310.7) | 0.495 | 3356.4 (2763.3-4146.5) | 3300.2 (2857.3-3852) | 0.031 (-0.011-0.073) |
| Jamaica | 24227.1 (17866.1-31926.3) | 45044 (32721.9-61165.3) | 0.859 | 2881.5 (2130.1-3826.3) | 3081.9 (2243.2-4144.1) | 0.252 (0.237-0.267) |
| Japan | 1007462 (760273-1340944.7) | 1911484.1 (1497359.6-2450937.5) | 0.897 | 1344.3 (1021.8-1780.9) | 1221.5 (948-1575.2) | -0.107 (-0.191--0.022) |
| Jordan | 12502.9 (9230.6-16521.6) | 88847.2 (66507.2-115447.1) | 6.106 | 2068.8 (1540.4-2720.5) | 2436.4 (1827.9-3135.8) | 0.24 (0.142-0.338) |
| Kazakhstan | 117447.1 (86944.2-155943) | 195478.5 (142791.7-261144.4) | 0.664 | 2761.8 (2036.7-3633.5) | 2840 (2127.9-3732.3) | 0.07 (0.051-0.089) |
| Kenya | 109940 (81374.1-145376.5) | 287938.5 (211607.5-388649.8) | 1.619 | 2935.2 (2185.5-3842.4) | 2950 (2184.7-3870.7) | -0.013 (-0.024--0.003) |
| Kiribati | 469.2 (345.5-616.9) | 911.3 (678.5-1196.1) | 0.942 | 3534.5 (2661.9-4528.4) | 3709.8 (2782-4711.2) | 0.175 (0.168-0.183) |
| Kuwait | 6556.9 (4846.3-8901) | 33206.8 (24886.9-44609.4) | 4.064 | 2094 (1553.5-2811.4) | 2201.9 (1633.9-2939.1) | 0.119 (0.097-0.142) |
| Kyrgyzstan | 25692.1 (19052.5-34262.8) | 45673.9 (33748.1-59967.7) | 0.778 | 2396.2 (1805.8-3121.5) | 2407.6 (1790.3-3132.6) | -0.006 (-0.035-0.023) |
| Lao People's Democratic Republic | 36783.4 (27634.6-48285.7) | 84060.1 (62586.5-109350.2) | 1.285 | 3993.2 (3028.2-5157.1) | 4123.6 (3078.5-5339.8) | 0.092 (0.078-0.106) |
| Latvia | 73203.5 (56917.7-93708.3) | 86684.7 (66013.3-110745.4) | 0.184 | 5873.4 (4538.2-7434.9) | 5894.3 (4525.3-7497.1) | 0.044 (0.025-0.063) |
| Lebanon | 20976 (15326.1-28405.2) | 58241.7 (43783.7-76325) | 1.777 | 2055.5 (1510.3-2749.2) | 2151 (1594.7-2844) | 0.123 (0.112-0.134) |
| Lesotho | 8300.3 (6036.2-11316.7) | 11345 (8241.4-15584.6) | 0.367 | 2826.3 (2087.2-3758.1) | 2926 (2157.4-3930.6) | 0.092 (0.079-0.104) |
| Liberia | 12963.6 (9573.9-17464.1) | 20759.4 (15152.7-27879.5) | 0.601 | 2106.3 (1565.8-2814.9) | 2156.1 (1589.4-2876) | 0.071 (0.061-0.08) |
| Libya | 18971.5 (13985.9-25251.8) | 51968.5 (38080.5-68977.4) | 1.739 | 2061.8 (1518.6-2718.9) | 2190.1 (1604.2-2935.9) | 0.178 (0.169-0.187) |
| Lithuania | 111960.7 (96386.8-129332.5) | 145380.5 (124098.7-170464.8) | 0.298 | 6661.3 (5705.6-7713.3) | 6719.4 (5741.7-7855) | 0.047 (0.034-0.059) |
| Luxembourg | 3644.4 (2654-4968.7) | 8875.8 (6400.4-12050.3) | 1.435 | 1591.7 (1166.6-2147.7) | 1771.3 (1278.9-2399.5) | 0.472 (0.424-0.521) |
| Madagascar | 54639.1 (40524.8-73661.8) | 109310.8 (80074.6-149693.5) | 1.001 | 2260.6 (1700.5-2987.9) | 2268.7 (1697.4-3071.7) | -0.012 (-0.022--0.003) |
| Malawi | 37625.5 (27596.9-51272.8) | 67645.3 (49388.6-89864.1) | 0.798 | 2269.6 (1685.5-3011.6) | 2288.3 (1693.6-3018) | 0.019 (0.007-0.031) |
| Malaysia | 162967 (122281.2-210458) | 573577.6 (421117.1-752932.8) | 2.520 | 4028 (3033.1-5185.3) | 4155.8 (3099-5397.6) | 0.062 (0.047-0.077) |
| Maldives | 1909.2 (1401.5-2505.4) | 6512 (4902.3-8492.2) | 2.411 | 3981.6 (2955-5155.2) | 4080 (3052.1-5347.9) | 0.049 (0.037-0.061) |
| Mali | 39706.4 (28974.6-53493.2) | 90322.4 (66119.9-120997.8) | 1.275 | 2089.7 (1531.9-2761.6) | 2124.2 (1567.9-2795) | 0.033 (0.023-0.042) |
| Malta | 4150.4 (3385.3-4798.4) | 10709.2 (8598.4-12572.7) | 1.580 | 2147.8 (1753.4-2471.9) | 2256.6 (1816.8-2635.6) | 0.181 (0.165-0.196) |
| Marshall Islands | 246.1 (180-326.7) | 578.3 (422.9-754.2) | 1.350 | 3647 (2764.8-4720.7) | 3940.5 (2975.8-5031.1) | 0.257 (0.244-0.271) |
| Mauritania | 9505.4 (6845.3-12621.1) | 21896.5 (16353.5-29837.2) | 1.304 | 2078.2 (1522.8-2742.8) | 2106.3 (1584.2-2825.7) | 0.013 (-0.001-0.028) |
| Mauritius | 12498.5 (9115.3-16522) | 37214.9 (27842.8-49110.3) | 1.978 | 4065.1 (3052.8-5233.3) | 4309.1 (3231.7-5590.3) | 0.195 (0.176-0.214) |
| Mexico | 959256.7 (780074.6-1179915.1) | 2863669 (2376886.6-3463957.6) | 1.985 | 5064.9 (4095.1-6225) | 5001.6 (4149.5-6018.9) | 0.076 (0.024-0.129) |
| Micronesia (Federated States of) | 740.2 (538.9-980.2) | 1075.4 (803.2-1434.8) | 0.453 | 3479.2 (2627.4-4487.4) | 3683.7 (2770.8-4761) | 0.215 (0.19-0.24) |
| Monaco | 455.4 (327.8-603.7) | 728.6 (522.7-974) | 0.600 | 1508.5 (1094.1-1998.1) | 1609 (1163.1-2122.6) | 0.3 (0.264-0.336) |
| Mongolia | 11844.7 (8753.6-15522.4) | 23650.9 (17745.6-30954.1) | 0.997 | 2693.5 (2007.6-3488.8) | 2725.5 (2057.9-3547.5) | 0.027 (0.006-0.048) |
| Montenegro | 7943.3 (5888.4-10313.6) | 14518 (10703.8-18954.9) | 0.828 | 3043.2 (2249.7-3937) | 3212.5 (2400.8-4139.2) | 0.141 (0.116-0.166) |
| Morocco | 139881.3 (100635.8-186673.4) | 358912.6 (258727.8-482059.4) | 1.566 | 2031.7 (1464.7-2696.1) | 2137.4 (1560.3-2824) | 0.134 (0.125-0.143) |
| Mozambique | 59561.9 (42712.5-80254.4) | 101088.5 (74806-136025.9) | 0.697 | 2258.5 (1657.5-3011.4) | 2284.7 (1723.7-3027.6) | 0.022 (0.008-0.035) |
| Myanmar | 400129.4 (295055.9-525874.5) | 821192.7 (608413.8-1101062.1) | 1.052 | 4005.4 (2970.1-5123.3) | 4103.6 (3072.9-5406.5) | 0.073 (0.068-0.078) |
| Namibia | 7900.8 (5672.2-10900.4) | 15658 (11550.9-21303.3) | 0.982 | 2831.1 (2050.2-3798.2) | 2919.6 (2150.7-3937.9) | 0.05 (0.033-0.066) |
| Nauru | 73.9 (54.8-97.6) | 75.1 (55.9-98.5) | 0.016 | 3471.1 (2614.2-4463.1) | 3634.6 (2766.4-4627.4) | 0.158 (0.141-0.175) |
| Nepal | 112656 (86573-144511.8) | 265742.9 (210720.5-327744.3) | 1.359 | 2491.9 (1899-3154) | 2407.1 (1922.2-2951.1) | 0.059 (-0.008-0.127) |
| Netherlands | 131013.6 (94323-178003.5) | 272961.8 (195229.3-360029.3) | 1.083 | 1521.7 (1102.5-2060.7) | 1595.3 (1147.3-2091.2) | 0.236 (0.206-0.266) |
| New Zealand | 45513.2 (36764.4-56014) | 90646.6 (76838.3-107293.9) | 0.992 | 2533 (2063.6-3103.9) | 2171.7 (1851.2-2565.8) | -0.349 (-0.469--0.229) |
| Nicaragua | 28332 (20998-37140.3) | 94721.4 (69555.7-123931.9) | 2.343 | 4325.4 (3229.9-5618.9) | 4567.2 (3387.8-5934.5) | 0.202 (0.189-0.215) |
| Niger | 27665.8 (20276.2-37406.6) | 78766.6 (57862.3-107477) | 1.847 | 2072 (1549-2751.9) | 2097 (1547.9-2780.9) | 0.031 (0.017-0.045) |
| Nigeria | 488731 (360352.8-667752.4) | 881564.6 (653688-1187496.4) | 0.804 | 2284.7 (1692.8-3060.6) | 2305.5 (1706.4-3073.1) | 0.002 (-0.013-0.017) |
| Niue | 32.6 (24.5-41.8) | 36.1 (27.1-47.3) | 0.107 | 3578.9 (2693.4-4572) | 3828.2 (2898-4913.9) | 0.237 (0.229-0.245) |
| North Macedonia | 25790.8 (18950.7-34094.8) | 52754.8 (38691.1-69991.2) | 1.045 | 3035.9 (2250.2-3961.1) | 3238.4 (2398.7-4184.5) | 0.176 (0.147-0.205) |
| Northern Mariana Islands | 241.4 (180.1-314.7) | 875.7 (645.4-1168.7) | 2.628 | 3482.9 (2612.8-4505.6) | 3610.4 (2691.3-4667) | 0.132 (0.122-0.142) |
| Norway | 157695 (123320.7-197363.4) | 255584.4 (201259.4-318521.5) | 0.621 | 5194 (4069.3-6475) | 5283.3 (4159-6604.2) | 0.052 (0.043-0.061) |
| Oman | 6484.7 (4776.8-8616.1) | 20600.1 (15281.8-27453.3) | 2.177 | 2052 (1531.2-2721.1) | 2144.1 (1586.7-2853) | 0.104 (0.087-0.121) |
| Pakistan | 931604.5 (692929.3-1234077.3) | 1887556.1 (1393107-2521875.2) | 1.026 | 3053.7 (2291.1-4004.3) | 3190.7 (2371.6-4138.3) | 0.167 (0.158-0.176) |
| Palau | 155.3 (113.8-206.5) | 390.7 (292.9-504.4) | 1.516 | 3518.2 (2646.8-4557.9) | 3719.9 (2770.6-4711.9) | 0.196 (0.185-0.208) |
| Palestine | 7759.9 (5728.8-10371.7) | 24811.3 (18311-33695.5) | 2.197 | 2058.8 (1537.2-2734.6) | 2156 (1590.7-2860.2) | 0.134 (0.125-0.143) |
| Panama | 30947.6 (23150.6-40345.8) | 96220 (71717-125511.3) | 2.109 | 4311.4 (3243.8-5603.9) | 4564.2 (3401.5-5934.5) | 0.195 (0.184-0.206) |
| Papua New Guinea | 26664.7 (19689.6-35298.9) | 79614.7 (60344.8-102558) | 1.986 | 3480 (2605.4-4488.9) | 3606 (2736.4-4545.3) | 0.125 (0.111-0.139) |
| Paraguay | 21374.3 (15649.9-28589.3) | 59444.3 (43326.1-78778.1) | 1.781 | 2146.8 (1578.7-2855.3) | 2227.8 (1623.4-2970.5) | 0.124 (0.109-0.14) |
| Peru | 147301.1 (107472.3-197827.4) | 446362.5 (330780.3-576398.5) | 2.030 | 2707.6 (1981.4-3632.9) | 2858.1 (2121.8-3675.1) | 0.194 (0.175-0.213) |
| Philippines | 558787.6 (421239.6-730566.8) | 1567523.6 (1189931.6-2051760) | 1.805 | 4334.7 (3260.3-5611.2) | 4477.4 (3403-5743.8) | 0.038 (0.014-0.063) |
| Poland | 790372.8 (590409.4-1035607.7) | 801969.6 (672324.8-964228.7) | 0.015 | 4474.9 (3378.4-5731.8) | 2591.9 (2187.7-3090.7) | -0.823 (-1.249--0.394) |
| Portugal | 98211.5 (71096.9-133463.6) | 175244.4 (124810-235645.2) | 0.784 | 1550 (1136.1-2087.6) | 1652.2 (1189.4-2200.9) | 0.317 (0.275-0.359) |
| Puerto Rico | 50673.8 (37449.8-67283.2) | 102020.9 (75066.9-133515.5) | 1.013 | 2944 (2182-3870.4) | 3119.1 (2304.6-4057.5) | 0.218 (0.194-0.242) |
| Qatar | 1282.9 (939.2-1710.1) | 13163.4 (9538.9-17868) | 9.261 | 2144.4 (1581.8-2841.4) | 2349.4 (1719.2-3074.9) | 0.285 (0.249-0.321) |
| Republic of Korea | 110756.7 (77809.3-150587.9) | 462238.2 (329398.2-635735.5) | 3.173 | 996.9 (704.2-1339.1) | 1025 (736.1-1392.7) | 0.081 (0.07-0.092) |
| Republic of Moldova | 101642.1 (76864.3-133299.4) | 143427.7 (107478.5-182710.4) | 0.411 | 5927.2 (4576.2-7622.9) | 5906.5 (4494.5-7518.9) | 0.006 (-0.013-0.025) |
| Romania | 449977.2 (370982-540452.3) | 622380.8 (522452-742515.2) | 0.383 | 3666.1 (3026.9-4360) | 3823.6 (3219.5-4529.1) | 0.123 (0.112-0.134) |
| Russian Federation | 3688071.6 (2798120.7-4795423.6) | 5806005.2 (4394376.8-7367910.4) | 0.574 | 6302.2 (4849.8-7904.3) | 6279.9 (4840.6-7837.4) | -0.003 (-0.016-0.011) |
| Rwanda | 26338.5 (19133.3-36125.8) | 55154.6 (40269.3-75147.8) | 1.094 | 2260.2 (1671.7-3016.3) | 2257.8 (1666.1-2997.2) | -0.018 (-0.032--0.003) |
| Saint Kitts and Nevis | 536.9 (383.6-725.7) | 979 (710.8-1363.8) | 0.823 | 2947 (2149.4-3925) | 3091.2 (2268.7-4145.2) | 0.174 (0.161-0.187) |
| Saint Lucia | 1186.4 (867.8-1560.9) | 3627.5 (2677-4752.4) | 2.058 | 3005.7 (2222.2-3938.9) | 3180.8 (2360.1-4157.7) | 0.213 (0.196-0.231) |
| Saint Vincent and the Grenadines | 953.7 (686-1271.8) | 2357.2 (1718.4-3166.9) | 1.472 | 2964.1 (2148.1-3932.1) | 3148.6 (2307-4157.4) | 0.21 (0.195-0.225) |
| Samoa | 1312.8 (959.4-1728) | 2344.5 (1758.3-3088.3) | 0.786 | 3507.6 (2639.1-4461) | 3649.6 (2730.1-4668.4) | 0.134 (0.118-0.15) |
| San Marino | 249.2 (179.2-331.6) | 548.4 (392.2-737.1) | 1.201 | 1520.1 (1105.6-2021.3) | 1613.7 (1164.7-2171.2) | 0.288 (0.255-0.32) |
| Sao Tome and Principe | 623.7 (453.1-842.2) | 1046.7 (775.9-1430.7) | 0.678 | 2095 (1529.7-2800.1) | 2146.6 (1588.1-2835.8) | 0.057 (0.049-0.065) |
| Saudi Arabia | 62237.8 (45839.7-83565.3) | 217112.9 (162429-289326) | 2.488 | 2083.2 (1548.7-2788.8) | 2194.3 (1639.2-2943.7) | 0.166 (0.159-0.173) |
| Senegal | 33157.1 (24387.2-44140.3) | 76325.8 (56769.2-100755.8) | 1.302 | 2110.9 (1571.7-2766.5) | 2164.7 (1623.2-2857.1) | 0.077 (0.064-0.089) |
| Serbia | 170621.1 (142805.6-203574.3) | 276916.3 (232109.2-330947.4) | 0.623 | 3376.4 (2862.1-3957.5) | 3584.6 (3026.7-4259.3) | 0.182 (0.172-0.192) |
| Seychelles | 977.3 (720.1-1267.4) | 2322.3 (1714.6-3036.2) | 1.376 | 4012.5 (2966.9-5192) | 4277.5 (3198.1-5548) | 0.178 (0.156-0.2) |
| Sierra Leone | 21131 (15266.4-27749.2) | 37151.7 (27384.2-50190.3) | 0.758 | 2053.9 (1486.7-2688.7) | 2100.7 (1538.7-2787.9) | 0.059 (0.048-0.07) |
| Singapore | 9719.5 (6953.8-13268.5) | 44705.6 (31520.4-61282.3) | 3.600 | 1021.6 (732.7-1375.1) | 1027.4 (728.5-1393) | 0.03 (0.011-0.05) |
| Slovakia | 86199.4 (77410.9-96581.5) | 148207.6 (132867.2-166254.4) | 0.719 | 3383.7 (3038.1-3775.3) | 3501.1 (3143.7-3897.9) | 0.103 (0.099-0.107) |
| Slovenia | 21892.5 (19029-25304.4) | 48478 (41904.2-56709.8) | 1.214 | 2309.6 (2014.1-2664.6) | 2398.8 (2083.1-2793.4) | 0.091 (0.073-0.109) |
| Solomon Islands | 2224.6 (1625.5-2979.4) | 5191.7 (3867.3-6770.9) | 1.334 | 3452.9 (2549.5-4464.4) | 3635.7 (2737.7-4757.9) | 0.188 (0.173-0.204) |
| Somalia | 20720.1 (15189.6-28279.9) | 49152.7 (35642-66086.3) | 1.372 | 2260.6 (1664.7-3014.8) | 2279.6 (1663.8-3057.8) | 0.004 (-0.008-0.016) |
| South Africa | 255000.6 (190622-342352.9) | 600713.2 (445717.3-820853.9) | 1.356 | 3105.1 (2335.9-4129.1) | 3200.1 (2390.5-4236) | 0.093 (0.07-0.116) |
| South Sudan | 33526.1 (24612.8-45869.6) | 41238.1 (30259.2-54802.1) | 0.230 | 2266 (1687.6-3031.8) | 2272 (1673.6-2985.6) | -0.011 (-0.032-0.01) |
| Spain | 294006.9 (212319.5-392473.9) | 657376.2 (474662.9-885517.3) | 1.236 | 1196.4 (867.9-1582.3) | 1562.8 (1133.6-2126.2) | 0.523 (0.377-0.67) |
| Sri Lanka | 205194.4 (151497.4-270526) | 524082.6 (389333.3-684312.3) | 1.554 | 4033.2 (3013.8-5190.5) | 4239.4 (3173.4-5473.7) | 0.16 (0.145-0.174) |
| Sudan | 95317.9 (71018.9-127679) | 209955.2 (154928.5-280613.2) | 1.203 | 2036.9 (1547.3-2702.7) | 2143 (1581.3-2851.2) | 0.126 (0.112-0.14) |
| Suriname | 3402.7 (2509.8-4533.6) | 8885.8 (6540-11849.4) | 1.611 | 2923.1 (2161.9-3841.5) | 3142.5 (2332.6-4138.2) | 0.284 (0.258-0.309) |
| Sweden | 155358.6 (112090-210291) | 206521.6 (149993-274307.2) | 0.329 | 2288.8 (1655.5-3090.2) | 2029.5 (1458.7-2700.2) | -0.125 (-0.221--0.028) |
| Switzerland | 208247.8 (188762-229734.8) | 407333.7 (372189.8-446497.2) | 0.956 | 4726 (4284.2-5211.5) | 4899.1 (4458.3-5389.6) | 0.12 (0.114-0.125) |
| Syrian Arab Republic | 52387.4 (39579-69079.6) | 143354.3 (105312.1-192960.3) | 1.736 | 2043.4 (1533.9-2695.2) | 2137 (1576.6-2860.5) | 0.103 (0.09-0.116) |
| Taiwan (Province of China) | 301960.8 (227814.2-402224.1) | 807881.5 (643271.2-1012256.5) | 1.675 | 3905.8 (2994.4-4970.4) | 4038.1 (3233.9-5014.7) | 0.091 (0.086-0.097) |
| Tajikistan | 29882.7 (21982.2-39388.1) | 72470.1 (54159.4-97250.1) | 1.425 | 2738.5 (2036.2-3545.1) | 2819.8 (2117.7-3660.7) | 0.09 (0.07-0.111) |
| Thailand | 595308.5 (443360.2-772281.6) | 2060302.4 (1539615.9-2676246.2) | 2.461 | 3970.5 (2976.8-5077) | 4075.5 (3070.5-5256.3) | 0.017 (-0.008-0.042) |
| Timor-Leste | 4615.3 (3469.7-6086.5) | 17192.3 (12656.7-22317.4) | 2.725 | 3953.3 (2992.9-5105.3) | 4109.2 (3066.2-5290.3) | 0.081 (0.066-0.097) |
| Togo | 11116.9 (8269.3-14964.7) | 31413.3 (23077.8-43269.7) | 1.826 | 2070.8 (1543.7-2745.9) | 2114.6 (1560.1-2814.8) | 0.029 (0.016-0.041) |
| Tokelau | 23 (17-30.3) | 25.9 (19.7-33) | 0.126 | 3490.7 (2599.2-4486) | 3640.5 (2772-4642.6) | 0.162 (0.146-0.177) |
| Tonga | 873.5 (655-1128.5) | 1286.6 (958.5-1663) | 0.473 | 3489.3 (2643.4-4457.4) | 3630.1 (2699.8-4692.4) | 0.138 (0.122-0.154) |
| Trinidad and Tobago | 11905.8 (8632.2-15967.3) | 30301.7 (21622.8-40605.6) | 1.545 | 3023.5 (2221.7-4027.9) | 3166.1 (2283.8-4180.1) | 0.163 (0.143-0.183) |
| Tunisia | 52902.8 (38334.1-72952.7) | 139898.8 (102186.8-183814) | 1.644 | 2055.6 (1515.2-2772.2) | 2155 (1592.3-2806.2) | 0.139 (0.127-0.15) |
| Turkey | 312290.1 (236209-419879.4) | 917721.8 (669393.6-1220309.8) | 1.939 | 2036.9 (1547.3-2702.7) | 2091 (1536.6-2758.1) | 0.112 (0.093-0.131) |
| Turkmenistan | 19316.8 (14204.7-25545.7) | 44918.6 (33036.1-58844.5) | 1.325 | 2738.5 (2036.2-3545.1) | 2793.3 (2101.5-3615.5) | 0.067 (0.046-0.088) |
| Tuvalu | 91.5 (66.5-121.3) | 164.1 (122.3-217.3) | 0.793 | 3485.3 (2605-4498.6) | 3670.4 (2770.1-4736.5) | 0.177 (0.162-0.193) |
| Uganda | 66941.3 (49020.9-90922.7) | 132363 (97400.5-179665.9) | 0.977 | 2274.2 (1688.9-3029.5) | 2299.3 (1699.1-3071.7) | -0.006 (-0.021-0.01) |
| Ukraine | 1577266 (1203461.3-2053064.9) | 1898402.2 (1436886.8-2419132.9) | 0.204 | 6330.8 (4896.4-7974) | 6314.2 (4833.2-7938.9) | -0.005 (-0.025-0.015) |
| United Arab Emirates | 4436.5 (3263.1-5835.1) | 65714.6 (47701.4-89839) | 13.812 | 2114.2 (1569-2832.3) | 2232.8 (1642.7-2962.4) | 0.154 (0.134-0.174) |
| United Kingdom | 950827.1 (782881.2-1163655.1) | 1520037.5 (1264893.9-1824195.1) | 0.599 | 2412.9 (1992.6-2935.9) | 2496.1 (2089.5-2993.2) | 0.313 (0.252-0.373) |
| United Republic of Tanzania | 114014.5 (83342.1-153798.8) | 256867.8 (189349-344455.2) | 1.253 | 2247.3 (1677.3-2991.1) | 2271.7 (1678.9-3036.7) | 0.014 (0.001-0.028) |
| United States of America | 2476237.2 (2024269.6-3030861) | 4930328.7 (4358829.1-5584989) | 0.991 | 1840.2 (1508.8-2218.6) | 1818 (1616.2-2037.1) | 0.243 (0.167-0.319) |
| United States Virgin Islands | 1054.7 (769.6-1399.2) | 2853.7 (2095.2-3796) | 1.706 | 2886 (2129-3760.7) | 3082.6 (2291.7-4071.9) | 0.242 (0.219-0.266) |
| Uruguay | 21187.2 (15389.5-28476.3) | 29949.4 (22020-40113.9) | 0.414 | 1209.8 (893.6-1614.8) | 1283.8 (943.9-1720.1) | 0.27 (0.21-0.33) |
| Uzbekistan | 118166.8 (86278.7-154640.4) | 308225.3 (227530.9-405360.1) | 1.608 | 2726.2 (2029.6-3550) | 2817.3 (2109.3-3686.6) | 0.088 (0.07-0.105) |
| Vanuatu | 993.6 (735.8-1317.2) | 2636.6 (1940-3447) | 1.654 | 3476.8 (2608.2-4469.5) | 3620.8 (2687.3-4651.4) | 0.16 (0.138-0.182) |
| Venezuela (Bolivarian Republic of) | 179784.7 (133252.4-232718) | 618816.3 (455389-809864.2) | 2.442 | 4321.4 (3214.3-5580.8) | 4546.8 (3383.5-5881.6) | 0.172 (0.156-0.188) |
| Viet Nam | 694754.3 (520018.3-912486.4) | 1969440.3 (1498748-2482839.1) | 1.835 | 4270.2 (3220.7-5510.4) | 4779.7 (3723.1-5937.8) | 0.184 (0.124-0.245) |
| Yemen | 43194.6 (31387.7-59020.4) | 131047 (96856.3-175004.8) | 2.034 | 2021 (1464.2-2663.2) | 2079 (1543.8-2749.7) | 0.074 (0.065-0.083) |
| Zambia | 31282.5 (23029.1-41755.8) | 65807 (48402.4-88914) | 1.104 | 2261.7 (1685.6-3006.6) | 2283.2 (1689.8-3034.8) | 0.003 (-0.007-0.013) |
| Zimbabwe | 53964.9 (39326.5-74507.2) | 77405.3 (57771.9-104992.7) | 0.434 | 2834.5 (2102.6-3821.3) | 2946 (2193.9-3897.7) | 0.113 (0.1-0.126) |

| **Table S5. The incidence of benign prostatic hyperplasia cases and rates in 1990 and 2021 across 204 countries, and the trends from 1990 to 2021** | | | | | | |
| --- | --- | --- | --- | --- | --- | --- |
| **location** | **Incident cases** | | | **Incident rates** | | |
| **1990 (95% UI)** | **2021 (95% UI)** | **percentage change (100%)** | **1990_per 100 000 (95% UI）** | **2021_per 100 000 (95% UI)** | **EAPC (95% CI)** |
| Afghanistan | 9334.7 (6981-12194.7) | 10304.4 (7968-13176.7) | 0.104 | 238.4 (180.6-307) | 249.8 (191.5-322.8) | 0.135 (0.125-0.145) |
| Albania | 3610.6 (2741.7-4666.2) | 8136.3 (6033-10389.7) | 1.253 | 348 (264.3-441.9) | 366 (277.4-461.7) | 0.025 (-0.043-0.093) |
| Algeria | 14960.7 (11158.4-19312.3) | 47210.6 (35630.8-61988.5) | 2.156 | 236.5 (178.3-302.6) | 248.8 (189-326.8) | 0.123 (0.108-0.139) |
| American Samoa | 49.2 (37.4-62.8) | 116.5 (89.4-148.4) | 1.368 | 441.9 (342.3-556.6) | 467.7 (362.2-585.4) | 0.187 (0.164-0.21) |
| Andorra | 55.4 (41.2-72.3) | 146.5 (108.2-190.4) | 1.644 | 177.9 (133-231.1) | 182.8 (136.7-237.5) | 0.43 (0.295-0.564) |
| Angola | 4898.5 (3699.1-6516.5) | 13892.4 (10385.7-18483) | 1.836 | 240.6 (181.5-312.8) | 246.8 (187.5-323.2) | 0.044 (0.029-0.058) |
| Antigua and Barbuda | 78.4 (59-99.9) | 199.6 (150.2-259.1) | 1.546 | 343.8 (260.3-438.2) | 364.8 (274.7-471.4) | 0.234 (0.213-0.255) |
| Argentina | 21671.8 (16377-28287.5) | 38439.7 (28819.7-50318.1) | 0.774 | 144.3 (110.7-187) | 153.5 (115.8-200.5) | 0.304 (0.203-0.406) |
| Armenia | 3900.6 (2887.8-5138.3) | 6414.8 (4781.7-8434.2) | 0.645 | 323.3 (242.3-413) | 329.2 (248.9-421.5) | 0.037 (0.002-0.071) |
| Australia | 21201.8 (15489.1-28639.2) | 49106.8 (35831.6-65747.6) | 1.316 | 226.2 (166.9-302.6) | 235.4 (173-311.3) | 0.188 (0.101-0.274) |
| Austria | 16812 (12347.6-21454.9) | 34291.7 (29269.7-39707.5) | 1.040 | 364.2 (267.4-464.3) | 452.5 (388.7-519.7) | 0.722 (0.613-0.831) |
| Azerbaijan | 6745.1 (4958.3-8919) | 16476.6 (12257-21806.9) | 1.443 | 322.9 (242.4-414.7) | 328.7 (248-421.6) | 0.046 (0.017-0.075) |
| Bahamas | 231 (173.4-299.3) | 714.8 (537.1-935.3) | 2.094 | 344.2 (256.7-449.4) | 362 (274.6-474.2) | 0.204 (0.18-0.227) |
| Bahrain | 251.8 (189.8-327) | 1795.9 (1352.6-2369.5) | 6.132 | 245.1 (184.3-314.2) | 264 (199.9-339.4) | 0.196 (0.18-0.211) |
| Bangladesh | 81028.7 (62184.2-103067.7) | 238491.7 (181826.5-303152.8) | 1.943 | 313.8 (238.2-401) | 324.7 (248.7-411.2) | 0.116 (0.109-0.123) |
| Barbados | 403 (301.2-515.5) | 892.6 (668-1151.6) | 1.215 | 344.2 (258.6-443.2) | 361.7 (272.8-462.1) | 0.204 (0.182-0.226) |
| Belarus | 32160.5 (25001.3-40761.2) | 41918.8 (32218.2-53312.1) | 0.303 | 625.1 (497.4-769.7) | 624.5 (491.3-773.5) | -0.026 (-0.053-0) |
| Belgium | 27188.5 (17375-34714.2) | 40793.6 (27377-51134.7) | 0.500 | 398 (257.8-505.3) | 411.2 (276-515.9) | 0.438 (0.294-0.581) |
| Belize | 156.9 (117.8-201.5) | 552 (417.2-718.3) | 2.518 | 337.8 (253.5-432.7) | 357.8 (270.8-463.9) | 0.239 (0.21-0.267) |
| Benin | 2300.6 (1758.1-3011.1) | 6128.2 (4626.2-7947.2) | 1.664 | 239.9 (183.6-312.9) | 245.3 (185.7-316.7) | 0.046 (0.03-0.063) |
| Bermuda | 95.6 (71.5-124.1) | 218.3 (163.8-284.5) | 1.283 | 338 (252.7-437.8) | 354.1 (266.5-462.3) | 0.188 (0.166-0.209) |
| Bhutan | 401.7 (302-526.8) | 1018.5 (786.3-1298.2) | 1.535 | 313.5 (237.4-402) | 327.4 (253.2-418.5) | 0.135 (0.124-0.145) |
| Bolivia (Plurinational State of) | 4913.9 (3691.6-6370) | 15381.1 (11423.8-19733.4) | 2.130 | 321.3 (240-413) | 340.5 (251.5-433.1) | 0.215 (0.195-0.235) |
| Bosnia and Herzegovina | 6451.8 (4897.3-8354.7) | 10970.9 (8165.9-14163.1) | 0.700 | 352.6 (268.1-453.2) | 379.1 (286.3-483.7) | 0.117 (0.05-0.183) |
| Botswana | 986.2 (762.3-1257.2) | 2631 (2031.1-3304) | 1.668 | 361 (282.6-452.9) | 370.3 (293.3-465.3) | 0.091 (0.075-0.108) |
| Brazil | 115155.5 (94099.3-140514.4) | 261668.7 (215585.7-322859.9) | 1.272 | 266.9 (217.9-325.8) | 221.8 (182.5-272.2) | -0.259 (-0.375--0.142) |
| Brunei Darussalam | 67.2 (48.8-89.2) | 259.3 (185.9-345.3) | 2.859 | 131.2 (95.4-176.3) | 137.1 (100.2-181.2) | 0.159 (0.104-0.214) |
| Bulgaria | 21833.4 (16379.1-27952.7) | 23077.5 (17530-29151.4) | 0.057 | 351.2 (268.1-443.7) | 371.6 (285.5-471.2) | 0.039 (-0.032-0.111) |
| Burkina Faso | 5249.9 (3975.8-6975.3) | 11091.8 (8431-14396.3) | 1.113 | 240.6 (184.1-313.5) | 245 (187-320.3) | 0.038 (0.033-0.043) |
| Burundi | 2780.7 (2131.3-3645.8) | 7020 (5260.8-9166.6) | 1.525 | 261.5 (200.7-341.9) | 261.6 (197.8-337.9) | -0.026 (-0.045--0.008) |
| Cabo Verde | 229.6 (171.8-292.7) | 498.4 (375.6-649.7) | 1.171 | 239.7 (180.9-302.8) | 247.1 (188.6-314.9) | 0.071 (0.057-0.086) |
| Cambodia | 8952.6 (6838.6-11419.5) | 25697.9 (19567.8-32533.5) | 1.870 | 452 (349.2-572.8) | 465.1 (354.4-581.9) | 0.069 (0.052-0.086) |
| Cameroon | 5437.7 (4095.4-7086.1) | 15575.5 (11716.4-20191.5) | 1.864 | 239.4 (180.1-310.1) | 244.5 (184-315.7) | 0.044 (0.036-0.052) |
| Canada | 29507.8 (22227.2-37845.6) | 68978.8 (52160.5-89675.8) | 1.338 | 201.6 (152.5-258.5) | 212 (159.8-272.6) | 0.308 (0.183-0.432) |
| Central African Republic | 1361.6 (996.7-1800.2) | 2667.8 (1998.4-3565.8) | 0.959 | 242.1 (182.3-316) | 247.6 (189.6-321) | 0.031 (0.016-0.045) |
| Chad | 3355.5 (2489.6-4409.4) | 7956.5 (6078.3-10487.6) | 1.371 | 240.4 (180.2-313) | 244.8 (186.5-318.7) | 0.026 (0.015-0.038) |
| Chile | 8225.7 (6182.9-10596.3) | 22667.4 (16973.2-29227.6) | 1.756 | 176.7 (132.9-226.9) | 189.2 (143-242) | 0.327 (0.228-0.426) |
| China | 1460426.5 (1081231.2-1887287.7) | 3244457.9 (2482942.7-4059868) | 1.222 | 363.1 (274.3-462.1) | 299.1 (233.3-375.2) | -0.209 (-0.36--0.059) |
| Colombia | 41884.9 (32160.5-53575.4) | 128477.8 (97434.6-164683.3) | 2.067 | 484.9 (371.7-613.7) | 503 (381.7-640.2) | 0.168 (0.153-0.183) |
| Comoros | 265.6 (199.3-345.5) | 611.1 (464-780) | 1.301 | 261.3 (196.7-335.6) | 261.5 (197.7-336.3) | -0.016 (-0.031--0.001) |
| Congo | 1195.7 (883.8-1576.6) | 3478 (2614.3-4587.2) | 1.909 | 243.1 (184.2-314.2) | 247.7 (185.9-318.6) | 0.024 (0.012-0.037) |
| Cook Islands | 28.7 (21.6-36.6) | 59 (44.8-74.8) | 1.056 | 426.6 (324.8-539.8) | 442.3 (338.2-558) | 0.132 (0.115-0.149) |
| Costa Rica | 4024.9 (3080-5120.6) | 13198.6 (10065.3-17112.7) | 2.279 | 482.1 (368.1-612.9) | 506.5 (389-652.1) | 0.205 (0.189-0.221) |
| Côte d'Ivoire | 5408.4 (4099.2-7256.6) | 15141.8 (11439.7-19404.5) | 1.800 | 239.9 (183.6-312.9) | 244.7 (184.1-311.8) | 0.039 (0.027-0.051) |
| Croatia | 10552.4 (8877.9-12352.9) | 14453 (11602.8-17411.4) | 0.370 | 389.2 (324.9-453.4) | 369.3 (302.1-441.8) | -0.042 (-0.087-0.003) |
| Cuba | 17345.1 (13026.3-22453.9) | 33253.4 (25298.2-42950.1) | 0.917 | 344.4 (259.5-449.9) | 360.6 (271-464.9) | 0.194 (0.171-0.218) |
| Cyprus | 746.3 (583.3-927.4) | 1824.4 (1433.3-2225.6) | 1.445 | 181.8 (143.6-225.5) | 182.2 (145.5-219.8) | 0.246 (0.138-0.355) |
| Czechia | 25632.9 (19938.1-31450.5) | 44227.6 (34924.8-53921.4) | 0.725 | 431.5 (339.4-524.8) | 469.2 (373.6-570.9) | 0.141 (0.085-0.197) |
| Democratic People's Republic of Korea | 22835.7 (17252.8-29438.4) | 54793.2 (41596.7-70005) | 1.399 | 399.7 (304.3-516.1) | 407.6 (310-511.6) | 0.079 (0.068-0.091) |
| Democratic Republic of the Congo | 18484.7 (13819.6-24357.1) | 44129.7 (32717-58316.9) | 1.387 | 242 (182.7-315.5) | 245.9 (185.9-321.5) | 0.028 (0.014-0.042) |
| Denmark | 6552.9 (4581.3-9174.1) | 10111.7 (7072.1-13858.1) | 0.543 | 189.7 (134.2-265.9) | 194 (136.2-267.4) | 0.471 (0.315-0.628) |
| Djibouti | 190.4 (141.4-249.8) | 993 (738.5-1275.2) | 4.215 | 260.3 (196.2-333.3) | 263.1 (198.2-338) | 0.004 (-0.013-0.022) |
| Dominica | 81.4 (61-106.1) | 168.1 (127.2-216.7) | 1.065 | 344 (259.5-445.8) | 369.2 (282.9-472.5) | 0.279 (0.253-0.306) |
| Dominican Republic | 6175.3 (4677.2-8027) | 16980.1 (12955-21599.8) | 1.750 | 334.9 (251.4-432.6) | 352.2 (268.5-447.8) | 0.221 (0.192-0.251) |
| Ecuador | 8942.7 (6842.6-11626.4) | 27022.5 (20224.9-34708) | 2.022 | 345.6 (264.1-447.7) | 341.3 (255.1-437.7) | 0.084 (-0.001-0.169) |
| Egypt | 33595.3 (25383.9-43811.4) | 90032.7 (67175.5-119649.1) | 1.680 | 233.9 (178.6-303) | 245.6 (182.8-322.4) | 0.122 (0.107-0.138) |
| El Salvador | 6563.4 (5015.2-8384.6) | 12602.1 (9708.6-15942) | 0.920 | 478.6 (366.1-610.4) | 506.4 (388.6-642.5) | 0.23 (0.21-0.251) |
| Equatorial Guinea | 221.1 (163.7-291.7) | 549.7 (418.8-714.7) | 1.486 | 241.3 (182.3-312.7) | 247.6 (189.6-321) | 0.044 (0.033-0.056) |
| Eritrea | 1316.7 (990.4-1744.1) | 3156.1 (2361.7-4121.5) | 1.397 | 259.8 (198.1-336.1) | 262.6 (197-338) | -0.003 (-0.018-0.012) |
| Estonia | 4971.9 (3875.2-6180.5) | 6342.1 (4961.8-7811.4) | 0.276 | 626.5 (496.3-771.7) | 629.1 (496.3-775.6) | -0.001 (-0.029-0.027) |
| Eswatini | 424.3 (319.5-563.9) | 785.8 (592.2-1031.9) | 0.852 | 313.8 (237.6-402.8) | 323.5 (246.1-421.2) | 0.095 (0.08-0.11) |
| Ethiopia | 30529.7 (23089.3-40267.9) | 61381.1 (46798.6-77878.9) | 1.011 | 277.6 (212-354.1) | 277.4 (210.2-356.5) | -0.031 (-0.051--0.01) |
| Fiji | 729.7 (557-919.1) | 1713.6 (1297.3-2202.8) | 1.348 | 432 (330.5-545.1) | 454.7 (347.9-568.3) | 0.171 (0.158-0.184) |
| Finland | 12019.1 (10099.3-14051.7) | 22041.7 (18528.6-25722.6) | 0.834 | 404.8 (341.2-472.3) | 410.9 (349.6-473.3) | 0.338 (0.23-0.446) |
| France | 61894.3 (45612.1-82039.2) | 102027.1 (74931.1-136394.3) | 0.648 | 176.9 (131-234.1) | 180.7 (134.8-238.2) | 0.399 (0.267-0.531) |
| Gabon | 649.4 (493.2-846.8) | 1362.1 (998.6-1806.3) | 1.097 | 242.4 (186-312.8) | 248.6 (188.9-322) | 0.055 (0.042-0.069) |
| Gambia | 465.7 (350.4-610) | 1178.2 (886.4-1530.6) | 1.530 | 239.7 (181.3-309.4) | 243.8 (183.8-318.3) | 0.037 (0.024-0.049) |
| Georgia | 8972.6 (6766.3-11617.9) | 9501.8 (7856.6-11289.4) | 0.059 | 345.7 (265.7-438.8) | 375.5 (313.4-442.2) | 0.118 (0.058-0.178) |
| Germany | 91739.1 (67626.3-118850.9) | 150393 (111507.4-197666.4) | 0.639 | 181.1 (133.8-234.2) | 188.3 (140.1-245.2) | 0.473 (0.34-0.606) |
| Ghana | 7562.8 (5673-9839.4) | 18965.6 (14437.8-24645.3) | 1.508 | 241.3 (181.7-311.1) | 245.8 (185.7-314.6) | 0.052 (0.044-0.06) |
| Greece | 12844.9 (9494.4-16892.2) | 18134.4 (14076.3-22644.5) | 0.412 | 178.1 (131.6-233.8) | 197.1 (153.9-245.2) | 0.385 (0.243-0.526) |
| Greenland | 36.4 (27-47.6) | 89 (65.5-118.2) | 1.445 | 200 (151.6-253.3) | 213.4 (161-270.3) | 0.349 (0.227-0.472) |
| Grenada | 101.1 (77.2-128.2) | 224.9 (169.3-293) | 1.225 | 344.7 (262.1-440.3) | 367.3 (276.8-471.8) | 0.242 (0.215-0.269) |
| Guam | 163.7 (122.6-212.9) | 445.7 (336.6-575.9) | 1.723 | 418.3 (323.2-524.3) | 427.8 (326.7-539.6) | 0.082 (0.062-0.103) |
| Guatemala | 8739.6 (6563-11290.5) | 26464 (20486.3-33925.7) | 2.028 | 482.2 (363.9-613.3) | 509.9 (393.5-649.5) | 0.244 (0.22-0.268) |
| Guinea | 4123.3 (3103.9-5379.2) | 7191.7 (5473.1-9411.9) | 0.744 | 239.9 (179.8-310.7) | 245.2 (187.8-319.9) | 0.033 (0.019-0.047) |
| Guinea-Bissau | 480 (362.4-619.4) | 846.8 (640.5-1096.9) | 0.764 | 239.7 (180.9-302.8) | 244.8 (186.9-313.7) | 0.047 (0.035-0.059) |
| Guyana | 636.8 (478.4-811.5) | 1203.4 (909-1578.8) | 0.890 | 348.1 (263.2-441.4) | 370.6 (281.1-473.3) | 0.26 (0.233-0.288) |
| Haiti | 5740.5 (4340.4-7439.8) | 12842 (9673.4-16658.3) | 1.237 | 344.6 (265.4-443.4) | 364.4 (274.1-465.9) | 0.237 (0.216-0.257) |
| Honduras | 4896.2 (3753.5-6240.5) | 15601.6 (11990.8-19957.2) | 2.186 | 484.9 (369.2-618.3) | 509.7 (392.1-645.4) | 0.207 (0.189-0.225) |
| Hungary | 22627.5 (17177.1-29033.6) | 30489.5 (23056.2-38721.6) | 0.347 | 354.3 (272.6-448.5) | 374.1 (286.4-469.1) | 0.061 (-0.01-0.131) |
| Iceland | 227.9 (167.4-298.9) | 491.7 (355.1-665.4) | 1.158 | 173.3 (128.1-225.8) | 178.3 (130.1-237.4) | 0.484 (0.335-0.634) |
| India | 973188.1 (741951.3-1239129.1) | 2620431.9 (2015176.7-3300153.5) | 1.693 | 385.6 (298-484.4) | 432.8 (335.7-540.3) | 0.221 (0.172-0.27) |
| Indonesia | 289821.9 (228592.4-358637.5) | 561944.7 (442350.3-702874.1) | 0.939 | 579.9 (464-701.9) | 437 (346-538.5) | -0.361 (-0.573--0.148) |
| Iran (Islamic Republic of) | 37823.3 (28296.1-50481.7) | 103524.7 (78935.7-132524.8) | 1.737 | 251.2 (191-322.4) | 261.8 (198.9-333.8) | 0.112 (0.099-0.126) |
| Iraq | 9078.9 (6893.5-11699.1) | 31152 (23500.4-41238.8) | 2.431 | 239.8 (182.1-311.8) | 250.6 (190.2-325.5) | 0.09 (0.072-0.107) |
| Ireland | 3355.2 (2497.2-4473.2) | 6777.6 (5031.1-8933.6) | 1.020 | 176.2 (131.1-232) | 182.7 (136.1-239.5) | 0.465 (0.331-0.599) |
| Israel | 3903.9 (2905-5191.5) | 10120.1 (7379.7-13213.1) | 1.592 | 178.3 (133.4-236) | 184.1 (136.5-242.6) | 0.44 (0.307-0.574) |
| Italy | 135567.4 (109639.1-166954.4) | 178783.8 (148581.1-211799.1) | 0.319 | 346.6 (283.4-423.7) | 329.8 (277.8-387.4) | 0.069 (-0.048-0.187) |
| Jamaica | 2785.8 (2096.1-3571.7) | 5482.5 (4122.7-7122.1) | 0.968 | 340.4 (256.3-434.1) | 362.9 (271.8-469.6) | 0.263 (0.239-0.288) |
| Japan | 124251.5 (94491.9-161999.9) | 186052.4 (144889.9-239686.6) | 0.497 | 155 (117.6-202.4) | 144.2 (112.7-184.9) | -0.031 (-0.141-0.079) |
| Jordan | 1696 (1257.3-2215.1) | 11780.7 (8986.4-14993.1) | 5.946 | 239.8 (181.2-305.1) | 277.6 (213.8-349.3) | 0.211 (0.125-0.298) |
| Kazakhstan | 15795.9 (11888.7-20977) | 26297.3 (19878.1-34885.2) | 0.665 | 323.8 (248.1-413.3) | 331.5 (255.7-424.6) | 0.042 (0.013-0.072) |
| Kenya | 13349.4 (10174.1-17026.9) | 37604.6 (28582.3-48597.8) | 1.817 | 326.7 (249.4-415.6) | 328.7 (250.6-417.6) | -0.011 (-0.022-0) |
| Kiribati | 68.1 (50.2-87.4) | 136 (102.1-173.7) | 0.997 | 428.1 (325.9-538.3) | 445.4 (339.8-551) | 0.137 (0.123-0.151) |
| Kuwait | 939.4 (714-1236.8) | 4641.7 (3509.2-6111.3) | 3.941 | 241.6 (183-312.8) | 253.6 (191.3-331.4) | 0.105 (0.083-0.128) |
| Kyrgyzstan | 3384.4 (2587.2-4366.8) | 6254.1 (4739.1-8171.4) | 0.848 | 284.9 (215.7-363.5) | 286.1 (219.1-359.7) | -0.019 (-0.06-0.023) |
| Lao People's Democratic Republic | 4734.8 (3607-6069.8) | 10906.4 (8262.3-13810.1) | 1.303 | 455.5 (350.6-569.3) | 466.9 (357.4-582.9) | 0.076 (0.058-0.093) |
| Latvia | 8564.5 (6810.9-10526.4) | 9139.5 (7151-11292.1) | 0.067 | 626.4 (492.6-764.4) | 628.1 (492.6-769.1) | 0.008 (-0.017-0.034) |
| Lebanon | 2695.6 (1999.5-3611.8) | 6453.8 (4935.9-8220.6) | 1.394 | 238.5 (178.7-312.6) | 249.3 (189.4-323.1) | 0.113 (0.1-0.125) |
| Lesotho | 1006.7 (758-1306.7) | 1453.1 (1099.4-1905) | 0.443 | 311.7 (237.7-399.5) | 322.9 (246.3-413.5) | 0.091 (0.077-0.105) |
| Liberia | 1552.9 (1162-2038.9) | 2778.5 (2075.8-3582.1) | 0.789 | 241.9 (182.4-315) | 246.8 (184.9-321.7) | 0.059 (0.049-0.069) |
| Libya | 2419.3 (1806.5-3124.3) | 6852.2 (5163.3-8770.3) | 1.832 | 238.9 (179.7-308.8) | 253.2 (189-329.9) | 0.161 (0.151-0.17) |
| Lithuania | 12491.9 (10478.2-14445.5) | 14856.8 (12423-17467) | 0.189 | 687.4 (573.5-803.3) | 691.4 (580.1-813.8) | 0.004 (-0.027-0.034) |
| Luxembourg | 441.6 (333-577.4) | 1006.1 (756.6-1330.1) | 1.278 | 187 (141.6-242.9) | 199.3 (150.4-262.6) | 0.599 (0.448-0.751) |
| Madagascar | 6908.5 (5171.6-9012.4) | 15157.3 (11265.3-20073.5) | 1.194 | 260.5 (195.8-335.4) | 261.5 (199.1-342.3) | -0.015 (-0.027--0.003) |
| Malawi | 4905.4 (3718-6434.8) | 9056.3 (6843.4-11690.7) | 0.846 | 261.6 (199.3-337.6) | 263.7 (198.2-341.1) | 0.013 (-0.001-0.026) |
| Malaysia | 20359.6 (15843.1-25593.4) | 69740.6 (53463.3-89335.5) | 2.425 | 459.7 (356.8-579.6) | 469.8 (362.8-596.2) | 0.043 (0.026-0.061) |
| Maldives | 252.7 (192.1-328) | 858.1 (657.5-1083.9) | 2.396 | 454.1 (347.5-572.6) | 462.1 (352.2-586.6) | 0.032 (0.019-0.045) |
| Mali | 5108.3 (3840.4-6765.8) | 11565.2 (8707.3-15097.5) | 1.264 | 240.6 (180.8-315.8) | 243.7 (183.7-315.8) | 0.02 (0.009-0.031) |
| Malta | 481.8 (384.7-577) | 1055.6 (827.5-1282) | 1.191 | 244 (195.1-290.5) | 248.2 (196.8-296.6) | 0.343 (0.223-0.463) |
| Marshall Islands | 33.9 (25.6-43.1) | 83.7 (63.9-107.4) | 1.469 | 438.5 (337.4-555.3) | 468.3 (364.1-584.9) | 0.208 (0.191-0.225) |
| Mauritania | 1175.4 (878.5-1517.3) | 2688 (2039.2-3510.9) | 1.287 | 239.2 (181-307.5) | 242.2 (182.6-314.7) | 0.001 (-0.015-0.018) |
| Mauritius | 1616.4 (1205-2055.9) | 4523.1 (3446.6-5718) | 1.798 | 462.8 (352.6-576.5) | 483.6 (375.1-601.4) | 0.148 (0.129-0.168) |
| Mexico | 110818.1 (90693.2-133133.2) | 328139.2 (269502.1-393147.3) | 1.961 | 539.1 (438.6-648.3) | 538.1 (441.4-644.1) | 0.112 (0.068-0.157) |
| Micronesia (Federated States of) | 101.2 (76.4-129.1) | 160.4 (119.3-212) | 0.585 | 422.7 (326.6-531.2) | 442.4 (338.3-559.2) | 0.174 (0.149-0.199) |
| Monaco | 49.7 (36.5-66.2) | 74.7 (55.2-98.6) | 0.503 | 177.2 (130.9-235.1) | 182.8 (136.7-237.5) | 0.443 (0.307-0.58) |
| Mongolia | 1541.4 (1182.3-1971.3) | 3282.1 (2478.4-4240.7) | 1.129 | 316.7 (242.8-401) | 320.1 (243.2-409.5) | 0.013 (-0.02-0.046) |
| Montenegro | 989.8 (744.3-1260.9) | 1791 (1358.4-2278) | 0.809 | 355 (267.9-451.1) | 375.6 (287.9-467.9) | 0.061 (-0.007-0.128) |
| Morocco | 16952.8 (12596.2-22061.2) | 44904.7 (33152.3-58967.9) | 1.649 | 235.6 (174.9-306.1) | 247.8 (185.4-322.8) | 0.131 (0.123-0.14) |
| Mozambique | 7817.2 (5929.7-10182.3) | 13719.9 (10349.5-17779.6) | 0.755 | 260.4 (199.2-338.5) | 262.7 (200.1-339.3) | 0.015 (0-0.03) |
| Myanmar | 51732.1 (39567.9-65596.1) | 104605.9 (78854.8-134627.3) | 1.022 | 456.6 (350.8-571.7) | 464.5 (358.9-581.7) | 0.052 (0.043-0.062) |
| Namibia | 991.7 (740-1316.8) | 2011.6 (1509.4-2624.6) | 1.028 | 312.7 (237.8-407.7) | 322.4 (241.8-413.6) | 0.057 (0.04-0.074) |
| Nauru | 10.6 (8.1-13.6) | 10.8 (8.2-13.8) | 0.019 | 421.7 (323.3-534.3) | 438.7 (336.6-553.7) | 0.125 (0.105-0.145) |
| Nepal | 14378.7 (11153-18285.6) | 31530 (25150.7-39161.3) | 1.193 | 282.5 (222.2-356.9) | 271 (217.9-335) | 0.042 (-0.028-0.112) |
| Netherlands | 15599.7 (11515.9-20435.6) | 29287.3 (21444.3-38689.2) | 0.877 | 178.3 (132.2-234.4) | 181.4 (134-235.6) | 0.387 (0.255-0.52) |
| New Zealand | 5466.9 (4297.8-6786) | 10341.9 (8473.3-12643) | 0.892 | 294.3 (234-363) | 256.1 (211-310.7) | -0.269 (-0.425--0.113) |
| Nicaragua | 3526.2 (2674.5-4566.7) | 11396 (8812.1-14610.3) | 2.232 | 483.6 (367.5-614.7) | 507.9 (390.6-645) | 0.21 (0.192-0.227) |
| Niger | 3661.8 (2738.4-4748.2) | 10149.4 (7611.7-13076.2) | 1.772 | 238.8 (180.8-309.1) | 241.3 (182.4-312.8) | 0.02 (0.005-0.034) |
| Nigeria | 62344.4 (47071.4-80638.9) | 110952.9 (84347.4-141459.9) | 0.780 | 256.3 (194.8-329.8) | 258.4 (196.4-330.7) | -0.011 (-0.026-0.004) |
| Niue | 4.1 (3.1-5.1) | 4.8 (3.6-6.1) | 0.171 | 432.8 (333.1-539.9) | 457 (350.5-567) | 0.188 (0.173-0.202) |
| North Macedonia | 3256.2 (2466.3-4215.8) | 6602.7 (4971.1-8471) | 1.028 | 354.2 (268.1-454) | 378.5 (288.5-476.1) | 0.09 (0.018-0.162) |
| Northern Mariana Islands | 37.8 (29.1-47.9) | 125.8 (94.9-163) | 2.328 | 422.4 (323.6-535.8) | 435.9 (335.2-546.5) | 0.109 (0.095-0.122) |
| Norway | 14475.8 (11436.1-17772.3) | 23028.5 (18413.6-28254.3) | 0.591 | 516.8 (413.9-633.6) | 513.2 (411.3-626.1) | 0.208 (0.12-0.297) |
| Oman | 895.7 (671.1-1138.3) | 3071.9 (2310.1-3965.9) | 2.430 | 237.8 (181.5-303.5) | 248.6 (186.9-321.3) | 0.095 (0.074-0.116) |
| Pakistan | 107810.2 (83214-138071.9) | 234114.2 (179722.6-297835.7) | 1.172 | 337.8 (259.6-429.9) | 352.5 (271.6-448.3) | 0.155 (0.145-0.164) |
| Palau | 20.8 (15.8-26.2) | 55.1 (41.9-69.6) | 1.649 | 425.9 (325.7-531.4) | 446.3 (344.8-552.4) | 0.16 (0.146-0.174) |
| Palestine | 950.9 (718.2-1257.2) | 3337.2 (2527.9-4312.5) | 2.510 | 238.6 (180.6-312.5) | 249.1 (191-317.7) | 0.127 (0.118-0.137) |
| Panama | 3624.1 (2761.6-4653.9) | 10921.7 (8323.7-13972.9) | 2.014 | 482.7 (366.9-619.4) | 507.9 (386.2-647.7) | 0.203 (0.185-0.222) |
| Papua New Guinea | 3912.2 (2965-5057.6) | 11424.9 (8738.3-14507.2) | 1.920 | 421.7 (319.8-527.5) | 434.9 (331.4-543.2) | 0.107 (0.09-0.125) |
| Paraguay | 2733.3 (2029.6-3548.4) | 7710.3 (5741.1-10110.8) | 1.821 | 258 (190.1-335.3) | 268.2 (199.6-350.6) | 0.14 (0.124-0.157) |
| Peru | 18558.2 (13946.7-24348.2) | 54066 (40917.9-68940.2) | 1.913 | 318.8 (239.7-418.6) | 336.5 (254.7-429.8) | 0.218 (0.193-0.242) |
| Philippines | 69577.7 (53478.3-86989.4) | 199954.6 (153505.5-251832.3) | 1.874 | 483.5 (375.3-602.1) | 495.5 (387.5-616.7) | 0.02 (-0.004-0.044) |
| Poland | 97137 (74128.9-123055.3) | 98687.4 (80104.9-118339) | 0.016 | 506.9 (390.3-632.6) | 311.5 (259.2-368.8) | -0.789 (-1.156--0.42) |
| Portugal | 11727.9 (8688.3-15732.2) | 17967.4 (13461-23534.8) | 0.532 | 181.5 (135.4-241) | 187 (139.9-244.9) | 0.457 (0.317-0.598) |
| Puerto Rico | 5899.3 (4387-7609.1) | 10884.2 (8311.5-13985.3) | 0.845 | 347.2 (259.7-447.6) | 366.7 (280.3-466.3) | 0.234 (0.202-0.267) |
| Qatar | 209.7 (155.3-277.3) | 2241.8 (1677.6-3026.7) | 9.691 | 247.1 (186-320) | 268.8 (205.4-346.1) | 0.249 (0.22-0.279) |
| Republic of Korea | 16483.6 (11827-22165) | 60538.1 (43742.1-84041.4) | 2.673 | 122.5 (88.9-162.5) | 126.9 (92.5-175.6) | 0.133 (0.077-0.189) |
| Republic of Moldova | 12255.8 (9573.8-15440.4) | 16204.1 (12571.3-19941.7) | 0.322 | 630 (496.7-773.4) | 630.2 (494.8-767.8) | -0.021 (-0.048-0.006) |
| Romania | 55937.8 (44885.1-66930.4) | 71969.1 (57156.9-86839.9) | 0.287 | 422.3 (340.4-503) | 444.2 (359-529.6) | 0.046 (-0.01-0.103) |
| Russian Federation | 462146.2 (358710.5-581991.7) | 661682.3 (515892.6-812023.6) | 0.432 | 665.4 (529.4-800.1) | 663.1 (527.2-795.4) | -0.021 (-0.048-0.005) |
| Rwanda | 3424.6 (2569.7-4569.3) | 7422.4 (5572.2-9842.6) | 1.167 | 260.7 (197.6-339.4) | 260.9 (197.2-340.6) | -0.012 (-0.025-0.001) |
| Saint Kitts and Nevis | 60.6 (44.5-80) | 138.3 (101.8-182.7) | 1.282 | 347.1 (259.2-449.4) | 364.8 (274.7-471.4) | 0.192 (0.174-0.21) |
| Saint Lucia | 142.2 (106.8-183.2) | 450.4 (342.3-574.8) | 2.167 | 352.7 (266.6-449.2) | 373.4 (283.1-476.9) | 0.231 (0.209-0.253) |
| Saint Vincent and the Grenadines | 113.6 (85.8-146.8) | 290.8 (220-376.3) | 1.560 | 348 (264.7-452.7) | 369.5 (280.2-470.8) | 0.228 (0.206-0.25) |
| Samoa | 183.2 (138.6-238.6) | 314.9 (240.4-401.9) | 0.719 | 426.4 (327.1-539.7) | 439.9 (337-551.4) | 0.105 (0.084-0.125) |
| San Marino | 28.6 (21.3-38) | 56 (41.6-73.2) | 0.958 | 178.4 (133.1-235.1) | 183.1 (136.5-238.2) | 0.43 (0.297-0.563) |
| Sao Tome and Principe | 77.3 (57.7-101) | 138.1 (104.3-183.1) | 0.787 | 241.1 (181.9-309.4) | 245.5 (187.4-316.2) | 0.041 (0.034-0.049) |
| Saudi Arabia | 8275.9 (6320.2-10689) | 32033.2 (24511.5-41056.4) | 2.871 | 240.7 (182.8-310) | 253.4 (192.6-326.9) | 0.154 (0.147-0.16) |
| Senegal | 4094.9 (3093.6-5306.4) | 9586.3 (7237.5-12342.4) | 1.341 | 242.4 (183.8-310.3) | 248.2 (190.1-317.3) | 0.068 (0.055-0.081) |
| Serbia | 22693.5 (18374.2-27563) | 31819.5 (25691.9-38266) | 0.402 | 391.7 (321.9-465.6) | 415.8 (340.6-491.3) | 0.1 (0.049-0.151) |
| Seychelles | 116.1 (87.6-147.7) | 297.3 (226.8-378.2) | 1.561 | 457.4 (348.2-576.4) | 481.6 (366.2-606) | 0.143 (0.117-0.168) |
| Sierra Leone | 2534.9 (1917.1-3244.4) | 4735.8 (3603.3-6067.4) | 0.868 | 236.5 (179.9-303) | 241.3 (183.6-312.8) | 0.057 (0.047-0.067) |
| Singapore | 1331.6 (963.7-1795.8) | 5948.3 (4252.9-8205) | 3.467 | 124.8 (90.6-168.5) | 127.1 (92.4-173.4) | 0.086 (0.021-0.15) |
| Slovakia | 10385.4 (8794-12212.9) | 17963.4 (14947.6-21269) | 0.730 | 390.9 (333.2-457.7) | 408.8 (344.5-475.8) | 0.041 (-0.004-0.087) |
| Slovenia | 2787.5 (2343.7-3294.5) | 5808.7 (4821.4-6992.2) | 1.084 | 279.1 (235.8-329.4) | 292.8 (245.7-347) | 0.044 (-0.01-0.098) |
| Solomon Islands | 319.6 (240.7-416.5) | 725.5 (554.7-925) | 1.270 | 419.5 (320.4-530.7) | 438.4 (336.1-555.1) | 0.15 (0.134-0.166) |
| Somalia | 2927.7 (2192.3-3828.8) | 6983.4 (5253.5-9102.3) | 1.385 | 260.7 (197.5-339.8) | 262.3 (197.1-339.9) | 0.007 (-0.004-0.018) |
| South Africa | 30241.5 (23107.5-38394.3) | 72549 (55331.4-94668.9) | 1.399 | 335.8 (256.5-423.1) | 345.5 (267-438.3) | 0.086 (0.065-0.107) |
| South Sudan | 4162.6 (3101.2-5567.9) | 5541.5 (4148.3-7134.4) | 0.331 | 261.2 (196.1-339.7) | 261.9 (198.8-335.1) | -0.012 (-0.033-0.009) |
| Spain | 35758.4 (26141.6-47435.9) | 70437.3 (51435.6-91861.5) | 0.970 | 143.6 (106.9-189.9) | 177.9 (129-232.5) | 0.631 (0.491-0.772) |
| Sri Lanka | 25525.6 (19393.6-32310.4) | 62707.3 (48219.6-78269.3) | 1.457 | 459 (352.4-582.5) | 477.4 (366.5-589) | 0.122 (0.104-0.141) |
| Sudan | 11832.1 (8942.8-15588.9) | 26672.7 (20224.2-34734.9) | 1.254 | 236.4 (179.7-309.7) | 248 (188.2-323.9) | 0.11 (0.093-0.128) |
| Suriname | 439.5 (332.7-570) | 1141.4 (866.9-1477.6) | 1.597 | 344.7 (262.1-440.3) | 368.8 (279.1-473.5) | 0.29 (0.256-0.324) |
| Sweden | 16049.7 (11857.6-21094) | 20146.8 (14848.9-26346.7) | 0.255 | 256.2 (191.4-334.8) | 225.8 (166.9-292.7) | 0.015 (-0.136-0.166) |
| Switzerland | 20511.4 (17821.8-23355.3) | 36869.3 (32034.2-42180.5) | 0.798 | 479.4 (418.2-542.5) | 481.1 (420.2-548.6) | 0.261 (0.159-0.363) |
| Syrian Arab Republic | 6647.6 (5033.3-8838.8) | 18334.4 (13818.6-24123.8) | 1.758 | 236.7 (180.7-310.2) | 247.7 (188.3-322.1) | 0.095 (0.079-0.111) |
| Taiwan (Province of China) | 42188.9 (31506.3-55094) | 96580.9 (76945.9-119877.3) | 1.289 | 467 (363.6-584.1) | 468.9 (377.9-570.4) | 0 (-0.015-0.015) |
| Tajikistan | 3866.8 (2882.5-5010.6) | 9838.4 (7445.5-12883.7) | 1.544 | 322 (240.4-410.8) | 330 (251.8-422.9) | 0.061 (0.032-0.089) |
| Thailand | 77395.3 (59611-97584.7) | 243426.8 (185451.8-309304.9) | 2.145 | 453.8 (348-566.6) | 462.6 (355.1-585.1) | 0.008 (-0.018-0.034) |
| Timor-Leste | 645.4 (491.9-823.9) | 2073.8 (1578.5-2639.5) | 2.213 | 452.3 (348.9-568.6) | 465.9 (358.6-588.8) | 0.054 (0.034-0.074) |
| Togo | 1432.1 (1086.3-1873.4) | 4336.7 (3204.8-5801.6) | 2.028 | 238.4 (181.5-310.8) | 242.6 (182.5-312.9) | 0.021 (0.009-0.033) |
| Tokelau | 3 (2.2-3.8) | 3.2 (2.4-4) | 0.067 | 424.3 (321.4-533) | 438.3 (338.5-552.6) | 0.132 (0.114-0.15) |
| Tonga | 117.9 (89.5-148.5) | 164.4 (125-208.6) | 0.394 | 424.3 (327.1-531.7) | 438.3 (332.9-554.3) | 0.104 (0.086-0.123) |
| Trinidad and Tobago | 1454.7 (1108.5-1892.2) | 3729.5 (2807.8-4806.9) | 1.564 | 355.2 (270.8-459.9) | 371.5 (279.6-473) | 0.188 (0.162-0.214) |
| Tunisia | 6532 (4876-8707.6) | 17150.5 (12784.4-22612.5) | 1.626 | 238 (180.3-312.2) | 249.6 (186.8-323.9) | 0.128 (0.115-0.141) |
| Turkey | 40488.7 (30775.9-53181) | 113567.1 (86408.8-146867.2) | 1.805 | 236.4 (179.7-309.7) | 242.6 (184.9-311.7) | 0.109 (0.09-0.128) |
| Turkmenistan | 2585.9 (1919.7-3370.6) | 6094.2 (4621.8-7809) | 1.357 | 322 (240.4-410.8) | 326.7 (250.9-414.8) | 0.038 (0.006-0.07) |
| Tuvalu | 13.3 (9.6-17.6) | 22.3 (16.8-28.8) | 0.677 | 422.4 (319.7-538.4) | 441.6 (337.1-558.2) | 0.148 (0.128-0.168) |
| Uganda | 8520.2 (6417.4-11266) | 17750.6 (13441.5-23255.6) | 1.083 | 262.2 (198.1-346.2) | 264.4 (199.7-346.8) | -0.015 (-0.028--0.001) |
| Ukraine | 188036.8 (146435.2-234504.8) | 209169.4 (164180.3-255269.4) | 0.112 | 666 (527.4-804.7) | 666.5 (524.9-801) | -0.025 (-0.052-0.002) |
| United Arab Emirates | 719.7 (538.7-930.4) | 11552.6 (8504.8-15689.5) | 15.052 | 244.4 (184.7-318.7) | 258.2 (194.6-336.5) | 0.142 (0.124-0.159) |
| United Kingdom | 99431.6 (80083.5-122283.6) | 141232.6 (115239.6-170143.4) | 0.420 | 257.5 (210.7-314.3) | 254.2 (210-304.5) | 0.531 (0.393-0.669) |
| United Republic of Tanzania | 14481.8 (10838.4-18935.5) | 33266.8 (24985-43238) | 1.297 | 259.6 (195.4-334.9) | 261.8 (196.7-339.8) | 0.008 (-0.003-0.019) |
| United States of America | 268645.5 (220723.3-323882.8) | 577896.5 (485817.8-671881.1) | 1.151 | 200.4 (165.6-239.5) | 216.8 (185.2-251.4) | 0.489 (0.4-0.577) |
| United States Virgin Islands | 139.7 (106.6-182.1) | 324.2 (240.8-411.5) | 1.321 | 341.3 (259.8-441.3) | 363.6 (271.5-465.6) | 0.259 (0.228-0.291) |
| Uruguay | 2525.5 (1887.9-3293.5) | 3426.2 (2566.7-4462.4) | 0.357 | 142.6 (107.4-184.9) | 151.3 (114.1-196) | 0.321 (0.205-0.437) |
| Uzbekistan | 15112.1 (11356.5-19618.3) | 41987.5 (31275-55044.8) | 1.778 | 320.1 (242.5-415.2) | 330.2 (248-424.6) | 0.061 (0.031-0.091) |
| Vanuatu | 141.9 (108-182.9) | 371.7 (279.7-477.9) | 1.619 | 421.9 (321.3-530.9) | 436.6 (333.3-553.2) | 0.134 (0.112-0.155) |
| Venezuela (Bolivarian Republic of) | 22113.8 (17002.9-28059.2) | 75367.2 (57846.2-96743.5) | 2.408 | 483.8 (370.9-605) | 505.3 (388.3-642.9) | 0.183 (0.168-0.198) |
| Viet Nam | 85641.8 (65604.5-108127.3) | 251138.1 (198151.2-307952.6) | 1.932 | 481.1 (373-599.4) | 526.8 (418.3-642.7) | 0.14 (0.088-0.192) |
| Yemen | 5866.5 (4411-7754.9) | 17024.7 (12928-21930) | 1.902 | 234.5 (178.3-305.7) | 241.8 (181.4-308.4) | 0.072 (0.061-0.083) |
| Zambia | 3977.2 (2990.6-5179.1) | 8975.5 (6756.6-11502.6) | 1.257 | 260.3 (196.9-335.4) | 263.5 (197-344.5) | 0.012 (0-0.024) |
| Zimbabwe | 6704.9 (4996.7-8846.7) | 9995.2 (7615.7-12932.1) | 0.491 | 312.8 (238.9-400.7) | 323.9 (246.1-413.2) | 0.107 (0.091-0.122) |

| **Table S6. The DALYs of benign prostatic hyperplasia cases and rates in 1990 and 2021 across 204 countries, and the trends from 1990 to 2021** | | | | | | |
| --- | --- | --- | --- | --- | --- | --- |
| **location** | **DALYs cases** | | | **DALYs rates** | | |
| **1990 (95% UI)** | **2021 (95% UI)** | **percentage change (100%)** | **1990_per 100 000 (95% UI)** | **2021_per 100 000 (95% UI)** | **EAPC (95% CI)** |
| Afghanistan | 1478.2 (859.6-2310.7) | 1495.8 (885.2-2360.3) | 0.012 | 40.4 (23.7-63.6) | 41.8 (24.8-65.7) | 0.097 (0.089-0.105) |
| Albania | 545.3 (324.7-855.7) | 1367.6 (808.8-2090.8) | 1.508 | 58.9 (34.7-90.8) | 61.8 (36.7-94.7) | 0.129 (0.106-0.152) |
| Algeria | 2430.8 (1393.9-3937.2) | 7582.6 (4520.5-11665.2) | 2.119 | 40.7 (23.5-64.8) | 42.6 (25.4-65) | 0.124 (0.112-0.137) |
| American Samoa | 6.9 (4.1-10.5) | 17.3 (10.1-26.8) | 1.507 | 72.4 (42.8-109.8) | 77 (45-117.9) | 0.223 (0.204-0.242) |
| Andorra | 9.2 (5.6-14.6) | 25.5 (14.9-39.8) | 1.772 | 30.4 (18.6-47.9) | 32.3 (18.9-50.4) | 0.283 (0.252-0.313) |
| Angola | 719.5 (425.1-1129.3) | 2013 (1205-3153.5) | 1.798 | 41.4 (24.4-66) | 42.3 (25.3-66) | 0.05 (0.038-0.061) |
| Antigua and Barbuda | 13.7 (8.3-21.7) | 31.1 (18.5-49.1) | 1.270 | 57.9 (34.9-91.5) | 61 (36.4-96.9) | 0.195 (0.18-0.21) |
| Argentina | 3534.3 (2099.9-5505.1) | 6465.6 (3734-10165.3) | 0.829 | 24.5 (14.6-38) | 26 (15-40.8) | 0.243 (0.196-0.29) |
| Armenia | 591.6 (350.5-896.6) | 1054.1 (622.1-1640.9) | 0.782 | 54.7 (32.4-84.5) | 56.1 (33.2-86.2) | 0.087 (0.063-0.112) |
| Australia | 3330.3 (1985.7-5330.4) | 8468.2 (4960.2-13305.7) | 1.543 | 36.8 (22-58.4) | 38.4 (22.5-59.8) | 0.12 (0.1-0.141) |
| Austria | 3204.7 (1916.9-5034.5) | 7465.3 (4686.7-10848.9) | 1.329 | 69.8 (41.8-109.9) | 92.2 (57.7-133.9) | 0.582 (0.463-0.702) |
| Azerbaijan | 1013.7 (601.5-1551) | 2457.5 (1434.3-3831.6) | 1.424 | 55.2 (32.6-87) | 56.5 (33.9-86.9) | 0.073 (0.053-0.093) |
| Bahamas | 36.2 (21.3-58.8) | 107.8 (63.8-172.9) | 1.978 | 58.5 (34.6-94.3) | 60.9 (36.8-97.7) | 0.155 (0.137-0.174) |
| Bahrain | 35.4 (21-55.1) | 237.2 (138.9-373) | 5.701 | 42 (25.2-65.2) | 45.1 (26.9-69.9) | 0.196 (0.18-0.212) |
| Bangladesh | 13555.7 (7939.6-20802.2) | 40943.6 (24095.9-64151.1) | 2.020 | 55.2 (32.4-85.5) | 57.4 (33.7-89.5) | 0.137 (0.131-0.144) |
| Barbados | 74.5 (44.2-117.5) | 149.8 (91-236.4) | 1.011 | 58.5 (35-91.4) | 60.9 (37-95.6) | 0.158 (0.139-0.177) |
| Belarus | 5291.4 (3206.6-8072.8) | 7079.6 (4268-10779.4) | 0.338 | 116.4 (70.4-177.2) | 115.4 (69.9-175.8) | -0.003 (-0.024-0.018) |
| Belgium | 5094.5 (2643.9-7885.5) | 8709.1 (4752-13130.3) | 0.710 | 76.5 (39.7-118.4) | 81.8 (44.5-123.9) | 0.305 (0.26-0.349) |
| Belize | 25.8 (15.3-40.9) | 85.6 (49.8-134.8) | 2.318 | 57.3 (34-90.8) | 60.2 (35.2-94.8) | 0.192 (0.174-0.211) |
| Benin | 384.4 (224.4-603.8) | 947.4 (558.3-1471.1) | 1.465 | 41.4 (24-65) | 42.5 (25.1-67.3) | 0.071 (0.057-0.085) |
| Bermuda | 15.1 (9.1-23.9) | 37.3 (22.1-58.8) | 1.470 | 57.1 (34.1-90.5) | 59.4 (35-93.1) | 0.145 (0.127-0.163) |
| Bhutan | 60.9 (35.6-94.2) | 172.7 (102.5-266.3) | 1.836 | 55.3 (32.3-84.9) | 58 (34.6-88.9) | 0.154 (0.144-0.164) |
| Bolivia (Plurinational State of) | 761.9 (454.8-1233.1) | 2404.7 (1407.5-3818.3) | 2.156 | 54.3 (32.1-87) | 57.3 (33.5-90.4) | 0.181 (0.164-0.198) |
| Bosnia and Herzegovina | 974.8 (579.3-1526.1) | 1813.5 (1067.2-2803.3) | 0.860 | 59.4 (35.1-92.3) | 63.7 (37.6-98.3) | 0.219 (0.189-0.249) |
| Botswana | 162.7 (96.7-252.8) | 412.8 (246.7-628.8) | 1.537 | 67 (40.5-104.6) | 68.2 (41.1-104.4) | 0.082 (0.068-0.096) |
| Brazil | 18006.2 (11408.4-27009.5) | 41588.7 (26444.5-62974.7) | 1.310 | 45.7 (28.8-68.6) | 37 (23.5-55.9) | -0.321 (-0.44--0.202) |
| Brunei Darussalam | 9.9 (5.7-15.6) | 35.5 (20.6-56.2) | 2.586 | 21.3 (12.3-33.8) | 22.1 (12.8-34.8) | 0.122 (0.104-0.14) |
| Bulgaria | 3481.6 (2098.6-5440.2) | 3945.3 (2366.6-6116.3) | 0.133 | 59.3 (35.8-92.1) | 62.6 (37.1-97.1) | 0.138 (0.11-0.167) |
| Burkina Faso | 836.9 (502.6-1297.2) | 1757.9 (1061.6-2767.6) | 1.100 | 41.5 (24.9-63.9) | 42.7 (26-67.3) | 0.08 (0.071-0.09) |
| Burundi | 453 (276.7-710.9) | 1058.2 (628.7-1659.9) | 1.336 | 45.3 (27.9-71.2) | 45.3 (27.1-71.1) | -0.01 (-0.026-0.007) |
| Cabo Verde | 42.3 (25-67) | 77.6 (46-120.8) | 0.835 | 42 (24.9-66.2) | 43.1 (25.7-67.8) | 0.069 (0.055-0.083) |
| Cambodia | 1372.8 (818.1-2142.1) | 3932.5 (2337.3-6102.5) | 1.865 | 78.5 (46.7-121.9) | 81.3 (48.5-124.8) | 0.107 (0.097-0.116) |
| Cameroon | 848.9 (509-1308.6) | 2380.8 (1404.6-3618.9) | 1.805 | 41.4 (25.1-64.5) | 42.5 (25.2-64.8) | 0.076 (0.066-0.086) |
| Canada | 5001.6 (3024.7-7884.7) | 12356.4 (7292.8-19111.4) | 1.470 | 34.9 (21.1-54.6) | 36.4 (21.2-56.1) | 0.218 (0.176-0.259) |
| Central African Republic | 197.1 (115.8-307.9) | 366.2 (215.3-574.7) | 0.858 | 41.1 (24.2-63.4) | 42.2 (25.3-67.6) | 0.059 (0.049-0.07) |
| Chad | 562.7 (329.8-883.2) | 1250.6 (733.6-1906.7) | 1.222 | 41.6 (24.5-64.6) | 42.5 (25.2-64.2) | 0.05 (0.041-0.059) |
| Chile | 1348.6 (810.3-2144.5) | 3847 (2309.5-6068) | 1.853 | 30.6 (18.5-48.1) | 32.7 (19.7-51.6) | 0.274 (0.235-0.312) |
| China | 199951.3 (115453.7-307321.6) | 460192.5 (270746.2-701425.3) | 1.302 | 57.3 (33.3-88) | 45.8 (27.3-69.5) | -0.256 (-0.426--0.086) |
| Colombia | 6731.3 (4095.2-10540.4) | 22129.1 (13586.9-34226.4) | 2.287 | 85.7 (52.6-132.8) | 89.8 (55.3-138) | 0.16 (0.151-0.17) |
| Comoros | 41 (24.5-65.7) | 95.5 (55.9-149.3) | 1.329 | 45 (27-71.2) | 45.1 (26.5-71.4) | 0.001 (-0.008-0.009) |
| Congo | 184 (107.7-294.3) | 506.4 (298.5-790.6) | 1.752 | 41.9 (24.7-66.1) | 42.8 (25.4-67.5) | 0.034 (0.023-0.045) |
| Cook Islands | 4.2 (2.5-6.5) | 9.4 (5.5-14.4) | 1.238 | 69.4 (41.6-106.6) | 72.4 (42.5-110.1) | 0.164 (0.153-0.176) |
| Costa Rica | 692.3 (418.6-1079.4) | 2261.7 (1367.4-3489.4) | 2.267 | 85.9 (51.9-133) | 89.9 (54.5-139.2) | 0.158 (0.146-0.17) |
| Côte d'Ivoire | 792.7 (463.9-1232.9) | 2264.6 (1344.4-3494.8) | 1.857 | 41 (24.3-63.8) | 42.5 (25.1-66.5) | 0.021 (-0.059-0.102) |
| Croatia | 1532.4 (964.7-2253.4) | 2415.5 (1528.7-3520.5) | 0.576 | 64.4 (40.4-94.9) | 60.5 (38-87.9) | 0.148 (0.131-0.166) |
| Cuba | 2980.6 (1787.4-4729.8) | 5601.9 (3370.8-8876.9) | 0.879 | 58.6 (35.1-92.8) | 60.8 (36.5-96.5) | 0.124 (0.11-0.137) |
| Cyprus | 122.9 (76.1-184.9) | 324.6 (208.2-487) | 1.641 | 30 (18.7-44.9) | 31.2 (20-46.8) | 0.234 (0.211-0.257) |
| Czechia | 4307.5 (2681.9-6453.6) | 8054.4 (4901.8-12297) | 0.870 | 75.6 (47-113) | 82.3 (50.5-124.3) | 0.088 (0.076-0.099) |
| Democratic People's Republic of Korea | 3049.6 (1791.7-4819.1) | 7767.6 (4472.5-12077.7) | 1.547 | 64.5 (36.9-101.2) | 66 (38.5-103.1) | 0.101 (0.093-0.109) |
| Democratic Republic of the Congo | 2806.4 (1640.8-4344) | 6342.6 (3720.8-9734.5) | 1.260 | 41.3 (24.4-64.4) | 42.2 (25.2-65.7) | 0.059 (0.047-0.072) |
| Denmark | 1153.5 (640.1-1913.2) | 1961.4 (1068.8-3259.4) | 0.700 | 32.3 (17.9-53.3) | 34.5 (19-56.9) | 0.336 (0.287-0.385) |
| Djibouti | 27.3 (16-42) | 144.4 (84.7-226.6) | 4.289 | 45.2 (26.8-69.5) | 45.7 (27.1-70.4) | 0.008 (-0.008-0.023) |
| Dominica | 14.1 (8.5-22.3) | 25.5 (15.3-41.5) | 0.809 | 58.6 (35.5-91.6) | 62.2 (37.3-99.5) | 0.233 (0.214-0.252) |
| Dominican Republic | 986 (584.1-1596.9) | 2731.9 (1637.5-4324.4) | 1.771 | 56.6 (33.6-91.9) | 58.8 (35.2-93.1) | 0.17 (0.145-0.194) |
| Ecuador | 1471.6 (851.2-2370.9) | 4436.3 (2594.1-7110.2) | 2.015 | 60.2 (34.8-96.9) | 57.6 (33.6-92.3) | -0.011 (-0.116-0.093) |
| Egypt | 5114.6 (3028.2-7970.4) | 13508.1 (7994.9-21427.4) | 1.641 | 40.2 (23.9-62.7) | 41.8 (25.3-66.8) | 0.114 (0.102-0.125) |
| El Salvador | 1108.3 (675.3-1762.6) | 2300.6 (1400.3-3593.9) | 1.076 | 84.5 (51.2-133.7) | 89.7 (54.9-141.2) | 0.225 (0.216-0.234) |
| Equatorial Guinea | 33.1 (19.4-53) | 81.7 (49-126.5) | 1.468 | 41 (24.4-65.5) | 42.5 (25.4-67.5) | 0.09 (0.08-0.099) |
| Eritrea | 176.2 (104.7-273.3) | 438.9 (257.5-673.6) | 1.491 | 44.6 (26.7-70.8) | 44.9 (26.7-69.6) | -0.008 (-0.021-0.006) |
| Estonia | 833.8 (507.7-1292.6) | 1204.9 (733.8-1822.7) | 0.445 | 116.2 (71.1-178.6) | 117.2 (71.4-177.7) | 0.058 (0.034-0.082) |
| Eswatini | 65.3 (38.8-102.2) | 117.6 (70.3-183) | 0.801 | 56.8 (34.5-87.7) | 57.7 (34.7-89) | 0.044 (0.028-0.061) |
| Ethiopia | 4746 (2871.9-7405.2) | 9957 (5989.3-15593.5) | 1.098 | 48.5 (29.4-76.5) | 48.8 (29.3-77.1) | 0.003 (-0.015-0.02) |
| Fiji | 102.9 (59.8-158.9) | 238 (141.5-364.2) | 1.313 | 70.3 (42-108.5) | 74 (44-113.7) | 0.195 (0.185-0.205) |
| Finland | 2126.7 (1331.3-3095.2) | 4838.7 (3068-6964) | 1.275 | 76 (47.4-110.4) | 80.4 (50.8-114.8) | 0.227 (0.209-0.245) |
| France | 10516.6 (6229.1-16887) | 19308.5 (11800.4-30727.5) | 0.836 | 30 (17.8-47.9) | 31.7 (19.2-50.7) | 0.266 (0.23-0.302) |
| Gabon | 105.1 (62.5-164.6) | 203.8 (122-317.6) | 0.939 | 41.8 (25.4-65.4) | 42.7 (25.4-66.5) | 0.047 (0.034-0.06) |
| Gambia | 72.2 (42.9-110.8) | 185.4 (111.2-291.1) | 1.568 | 41.8 (24.6-64.2) | 42.4 (25.1-66.7) | 0.044 (0.028-0.06) |
| Georgia | 1404.3 (827.4-2156.1) | 1573.6 (996.9-2307.7) | 0.121 | 59.4 (34.7-91.5) | 64.3 (41-94.4) | 0.099 (0.03-0.169) |
| Germany | 15050.4 (8825.3-23781.9) | 28649.5 (16851.8-46164.3) | 0.904 | 30.7 (18.1-48.9) | 33.1 (19.6-53.2) | 0.334 (0.3-0.368) |
| Ghana | 1168.7 (715.8-1828.6) | 2914.4 (1751.2-4510.4) | 1.494 | 41.9 (25.3-65.4) | 42.9 (25.5-66.3) | 0.076 (0.07-0.082) |
| Greece | 2201.4 (1305.5-3496) | 3671.7 (2230.7-5558.8) | 0.668 | 30.5 (18.1-48.2) | 35.1 (21.5-53.5) | 0.196 (0.099-0.293) |
| Greenland | 5.2 (3-8.5) | 14.1 (8.4-22.2) | 1.712 | 34.4 (20.1-54.3) | 36.6 (21.6-58.3) | 0.286 (0.245-0.328) |
| Grenada | 17.8 (10.6-28.6) | 33.4 (20-52.1) | 0.876 | 58.3 (34.8-93.2) | 61.7 (36.9-95.9) | 0.198 (0.179-0.216) |
| Guam | 22.5 (13.2-34.5) | 69.5 (40.3-107.1) | 2.089 | 68.7 (40.9-107.7) | 70.4 (40.9-108) | 0.093 (0.079-0.108) |
| Guatemala | 1346.3 (817.3-2103.5) | 4497.9 (2726.3-6931.9) | 2.341 | 84.7 (51.6-132.9) | 89.9 (54.6-138.3) | 0.23 (0.217-0.242) |
| Guinea | 683.3 (402.9-1087.5) | 1168.2 (680.8-1777.7) | 0.710 | 41.6 (24.8-66.4) | 42.7 (25-64.7) | 0.055 (0.04-0.071) |
| Guinea-Bissau | 75.8 (43.6-119.6) | 126 (74.9-192.4) | 0.662 | 41.4 (24.3-65.2) | 42.6 (25-66) | 0.07 (0.058-0.083) |
| Guyana | 97.9 (57.5-157.7) | 177.8 (105.8-283.7) | 0.816 | 58.3 (34.5-92.1) | 61.8 (37.1-97.1) | 0.229 (0.21-0.249) |
| Haiti | 836.2 (499.5-1342.8) | 1893.1 (1106.2-3031.5) | 1.264 | 57.7 (34-91.4) | 61.2 (35.7-97.6) | 0.222 (0.208-0.235) |
| Honduras | 802.9 (487.2-1246.6) | 2559.1 (1557.4-4001.3) | 2.187 | 86.3 (52.3-133.4) | 90.5 (54.9-139.6) | 0.168 (0.158-0.178) |
| Hungary | 3626.1 (2177.6-5500.6) | 5146.7 (3069.6-8025.3) | 0.419 | 59.2 (35.4-89.2) | 63.1 (38-97.7) | 0.185 (0.157-0.213) |
| Iceland | 38.7 (23-60.4) | 88.8 (52.4-141.1) | 1.295 | 29.2 (17.4-45.4) | 31.2 (18.5-49.2) | 0.338 (0.292-0.385) |
| India | 154448.3 (92623.8-233621.3) | 432532.6 (259932.5-666840.1) | 1.801 | 69.6 (41.7-106.8) | 77.5 (46.7-118.5) | 0.244 (0.209-0.279) |
| Indonesia | 48015.6 (29374.3-73896.3) | 87537.1 (52869.5-134766.2) | 0.823 | 111.4 (67.2-169.3) | 78.6 (48.3-120.8) | -0.433 (-0.697--0.168) |
| Iran (Islamic Republic of) | 5817.8 (3458.6-9129.2) | 16849.8 (9952.6-26143.3) | 1.896 | 43.9 (26.2-69.4) | 45.8 (27.1-71.9) | 0.114 (0.102-0.126) |
| Iraq | 1464 (864.4-2308.9) | 4574.6 (2739.8-7079) | 2.125 | 40.9 (24.3-65) | 42.2 (24.5-64.7) | 0.058 (0.041-0.076) |
| Ireland | 577.8 (337.5-908.6) | 1242.2 (722.3-1938.7) | 1.150 | 30.1 (17.8-47.4) | 32.3 (18.8-50.2) | 0.332 (0.293-0.371) |
| Israel | 691.4 (404.5-1093.6) | 1859.2 (1084.8-2910.1) | 1.689 | 30.5 (18-48.1) | 32.6 (19-50.9) | 0.289 (0.258-0.32) |
| Italy | 26613 (16637.2-40002.9) | 39945.7 (25177.2-58939.4) | 0.501 | 67.1 (42-100.6) | 66.6 (41.6-97.8) | 0.06 (0.018-0.102) |
| Jamaica | 486.3 (291-785.8) | 898.4 (537.1-1433.2) | 0.847 | 57.9 (34.8-93.4) | 61.4 (36.8-98.4) | 0.229 (0.214-0.245) |
| Japan | 20174.2 (11939.2-31960.7) | 38081.7 (23592.5-59365.9) | 0.888 | 26.8 (15.9-42.7) | 24.5 (15-38.4) | -0.084 (-0.17-0.002) |
| Jordan | 252.2 (148.5-391.9) | 1772.7 (1059.1-2763) | 6.029 | 41.3 (24.5-65.6) | 48.1 (29.1-74) | 0.213 (0.115-0.312) |
| Kazakhstan | 2354.9 (1368.4-3624.1) | 3920.3 (2355.3-6015.1) | 0.665 | 54.9 (32.2-86.1) | 56.4 (33.8-85.8) | 0.07 (0.054-0.086) |
| Kenya | 2194.9 (1294.6-3418.7) | 5775.9 (3439.6-8990) | 1.632 | 58.2 (34.3-90.1) | 58.6 (34.3-91.2) | 0.003 (-0.003-0.009) |
| Kiribati | 9.3 (5.5-14.5) | 18.2 (10.8-28.7) | 0.957 | 69.2 (40.3-105.5) | 72.8 (43.1-110.2) | 0.184 (0.175-0.193) |
| Kuwait | 132.5 (78.8-203.2) | 662.3 (387.6-1031.7) | 3.998 | 41.7 (25-65.3) | 43.4 (25.5-67.7) | 0.076 (0.053-0.099) |
| Kyrgyzstan | 517.7 (302.7-823.6) | 924.4 (553.3-1448.3) | 0.786 | 47.9 (28.3-75.7) | 48.3 (28.2-75.5) | 0.014 (-0.015-0.042) |
| Lao People's Democratic Republic | 740.3 (448.8-1162.9) | 1698.5 (1009.3-2648.4) | 1.294 | 79.8 (48.4-123.4) | 82.6 (49.2-127.2) | 0.106 (0.091-0.121) |
| Latvia | 1443.7 (873.7-2200.3) | 1711.6 (1029.2-2601.3) | 0.186 | 115.3 (69-172.9) | 116.4 (70-176.7) | 0.079 (0.055-0.103) |
| Lebanon | 418.3 (245.5-643.1) | 1132.6 (672.1-1733.1) | 1.708 | 40.6 (23.9-62.2) | 42 (24.9-64.6) | 0.091 (0.082-0.1) |
| Lesotho | 167.2 (100.8-264.2) | 224.9 (132.8-354.5) | 0.345 | 56.5 (34.5-88.6) | 57.5 (33.6-90.2) | 0.031 (0.018-0.045) |
| Liberia | 257.3 (156.7-405.3) | 413.1 (238.5-650.1) | 0.606 | 41.6 (25.1-65.6) | 42.5 (25.1-66) | 0.075 (0.063-0.088) |
| Libya | 380.2 (223.9-591.2) | 1031.1 (609.8-1590.1) | 1.712 | 41 (24.2-64.9) | 43.1 (25.1-67) | 0.137 (0.128-0.145) |
| Lithuania | 2214.5 (1393-3279.4) | 2874.1 (1815.3-4294.3) | 0.298 | 131.4 (82.5-194.3) | 132.8 (83.9-198.9) | 0.05 (0.039-0.061) |
| Luxembourg | 73.1 (44.3-115.2) | 178.1 (107.5-284) | 1.436 | 31.8 (19.3-50.4) | 35.5 (21.5-56.6) | 0.489 (0.44-0.539) |
| Madagascar | 1095.2 (635.5-1678.7) | 2211.2 (1276.1-3458.6) | 1.019 | 45 (26-69) | 45.3 (26.2-69.5) | 0.012 (0.003-0.022) |
| Malawi | 755.8 (441.6-1188.6) | 1362.2 (802.7-2097.8) | 0.802 | 45.2 (26.5-70.2) | 45.6 (27.1-70.5) | 0.047 (0.039-0.055) |
| Malaysia | 3259.6 (1955.3-5102.1) | 11456.4 (6715.7-17781) | 2.515 | 80.1 (47.4-125.1) | 82.6 (48.3-127.8) | 0.069 (0.055-0.082) |
| Maldives | 38.6 (23.1-60.7) | 131.6 (79.9-204.7) | 2.409 | 79.7 (47.6-122.7) | 81.7 (49.6-126.1) | 0.063 (0.053-0.074) |
| Mali | 793.6 (472.1-1234.1) | 1810.1 (1069.3-2807.3) | 1.281 | 41.4 (25.1-64.1) | 42.2 (25.1-65.6) | 0.053 (0.043-0.063) |
| Malta | 83.8 (51.5-122.2) | 214.7 (132.6-315.4) | 1.562 | 43.3 (26.6-63.1) | 45.4 (27.9-66.3) | 0.179 (0.162-0.196) |
| Marshall Islands | 4.9 (2.8-7.6) | 11.5 (6.9-17.6) | 1.347 | 71.8 (42.8-109.6) | 77.1 (44.6-116.8) | 0.243 (0.228-0.257) |
| Mauritania | 190.9 (112.9-304.1) | 442.7 (265.1-705.2) | 1.319 | 41.5 (24.3-65.7) | 42.4 (25.5-67) | 0.035 (0.021-0.049) |
| Mauritius | 250.9 (148-391.8) | 737.8 (435.2-1149.4) | 1.941 | 80.9 (48.6-124.4) | 84.9 (50.3-131.5) | 0.166 (0.149-0.184) |
| Mexico | 18903.5 (12027.8-28559.9) | 56720.1 (36170.7-85361.8) | 2.001 | 99.4 (63.3-150.8) | 98.8 (62.9-149) | 0.088 (0.039-0.137) |
| Micronesia (Federated States of) | 14.7 (8.7-22.5) | 21.5 (12.9-34.1) | 0.463 | 68.6 (39.4-104.7) | 72.5 (42.4-110.2) | 0.208 (0.182-0.233) |
| Monaco | 9.2 (5.5-14.5) | 14.6 (8.6-22.9) | 0.587 | 30.4 (18.1-47.6) | 32.5 (19.2-50.6) | 0.292 (0.257-0.326) |
| Mongolia | 237.3 (139.4-364.6) | 474.9 (281.2-736.1) | 1.001 | 53.6 (31.6-82.5) | 54.2 (31.6-83.9) | 0.024 (0.004-0.044) |
| Montenegro | 158.2 (92.9-245.7) | 288.1 (171-441.3) | 0.821 | 60.3 (35.2-94.2) | 63.5 (37.7-96.2) | 0.14 (0.115-0.165) |
| Morocco | 2791.1 (1649.3-4407.8) | 7108.6 (4227-11038.8) | 1.547 | 40.4 (23.9-63.8) | 42.1 (24.9-65.2) | 0.1 (0.091-0.109) |
| Mozambique | 1185.1 (692.6-1860.5) | 2017.8 (1198.8-3182.5) | 0.703 | 44.5 (26.8-69.9) | 45.1 (26.2-69.9) | 0.04 (0.033-0.048) |
| Myanmar | 7994.1 (4849.9-12249.1) | 16441 (9881.2-25705.5) | 1.057 | 79.3 (47.7-120.2) | 81.5 (48.9-125.5) | 0.094 (0.09-0.099) |
| Namibia | 159.5 (93.7-253) | 313.6 (184.8-489.5) | 0.966 | 56.6 (32.9-88.7) | 58 (34-89.6) | 0.038 (0.022-0.053) |
| Nauru | 1.5 (0.9-2.2) | 1.5 (0.9-2.3) | 0.000 | 68.5 (41.1-104.6) | 71.2 (42.8-108) | 0.144 (0.126-0.162) |
| Nepal | 2233.9 (1343.1-3332.5) | 5285.9 (3234.7-7995) | 1.366 | 49 (29.8-73.2) | 47.7 (29.1-72.5) | 0.085 (0.019-0.151) |
| Netherlands | 2632.9 (1571.9-4028.9) | 5466.8 (3224.7-8743.3) | 1.076 | 30.5 (18.2-46.5) | 32 (18.9-50.5) | 0.228 (0.198-0.258) |
| New Zealand | 896.9 (553.4-1353.1) | 1795.2 (1120-2658.2) | 1.002 | 49.8 (30.8-74.9) | 43.1 (27-63.9) | -0.329 (-0.443--0.214) |
| Nicaragua | 564.2 (336.9-879.5) | 1871.7 (1134.7-2878.5) | 2.317 | 85.7 (51.9-131.9) | 90 (54.6-137.9) | 0.185 (0.173-0.196) |
| Niger | 555.9 (332.7-879.7) | 1590.7 (941-2556.4) | 1.861 | 41.2 (24.8-65.5) | 42 (25.2-66.2) | 0.058 (0.041-0.074) |
| Nigeria | 9763.9 (5695.8-15034.6) | 17714.1 (10560-27367) | 0.814 | 45.2 (26.6-71.2) | 46 (27-73) | 0.041 (0.026-0.056) |
| Niue | 0.6 (0.4-1) | 0.7 (0.4-1.1) | 0.167 | 70.8 (42.4-106.1) | 75.1 (44.2-114.2) | 0.222 (0.213-0.231) |
| North Macedonia | 512.6 (304.7-795.6) | 1048.4 (612.2-1642.8) | 1.045 | 60 (35.5-92.3) | 64 (37.4-97.6) | 0.184 (0.156-0.213) |
| Northern Mariana Islands | 4.9 (2.8-7.5) | 17.5 (10.4-27.2) | 2.571 | 69.3 (40.5-108) | 71.4 (42.2-108.7) | 0.124 (0.114-0.134) |
| Norway | 3125.3 (1943.6-4690.5) | 5118.5 (3175.9-7692.7) | 0.638 | 103.2 (64.1-153.5) | 106 (65.6-158.7) | 0.091 (0.083-0.098) |
| Oman | 129.3 (76.5-199.7) | 411.7 (244.8-642.4) | 2.184 | 40.4 (23.9-62.8) | 42 (24.9-65) | 0.11 (0.093-0.127) |
| Pakistan | 18508.3 (10884.9-28962.6) | 37590.5 (22271.2-57693) | 1.031 | 60.5 (35.6-94) | 63 (37.2-98.3) | 0.163 (0.151-0.174) |
| Palau | 3.1 (1.8-4.8) | 7.7 (4.5-12.1) | 1.484 | 69.5 (39.8-105.5) | 72.8 (42.6-110.4) | 0.172 (0.161-0.184) |
| Palestine | 154.9 (90-242.7) | 493.5 (289-770.4) | 2.186 | 40.9 (23.6-64) | 42.4 (24.9-65.2) | 0.104 (0.097-0.111) |
| Panama | 617.5 (379.1-966.2) | 1909.6 (1162.1-2957.3) | 2.092 | 85.8 (52.7-133) | 90.5 (55.1-140.2) | 0.18 (0.169-0.191) |
| Papua New Guinea | 530.4 (313.8-831.6) | 1580.5 (947.3-2416.3) | 1.980 | 68.2 (40.4-104) | 70.7 (42.6-106.3) | 0.136 (0.12-0.151) |
| Paraguay | 426.7 (252.3-665.7) | 1180.4 (701.8-1921.3) | 1.766 | 42.7 (25.3-66.1) | 44.1 (26.4-70.8) | 0.106 (0.091-0.122) |
| Peru | 2958.3 (1721.9-4705.6) | 8926.2 (5242.2-14228.1) | 2.017 | 54.2 (31.4-86.1) | 57.1 (33.5-91.1) | 0.193 (0.173-0.213) |
| Philippines | 11136.8 (6632.6-17190.3) | 31472.2 (19189.4-48290.2) | 1.826 | 85.8 (50.9-131.3) | 89.1 (53.9-136.4) | 0.062 (0.035-0.088) |
| Poland | 15482.1 (9401.1-24041.1) | 15755.3 (10108.5-23430.5) | 0.018 | 87.3 (53.1-133.9) | 50.9 (32.6-74.7) | -0.796 (-1.223--0.367) |
| Portugal | 1960.7 (1171.9-3122.9) | 3497.9 (2043.2-5576.6) | 0.784 | 30.9 (18.5-48.5) | 33.1 (19.7-52.5) | 0.339 (0.298-0.38) |
| Puerto Rico | 1009.3 (584.7-1605) | 2008.6 (1205-3155.5) | 0.990 | 58.6 (34-92.7) | 61.7 (37-96.3) | 0.196 (0.174-0.217) |
| Qatar | 26 (15.3-41) | 264.9 (156.5-420.9) | 9.188 | 42.4 (25.2-67) | 45.9 (27.7-71.7) | 0.258 (0.223-0.293) |
| Republic of Korea | 2207.9 (1250.9-3572.5) | 9217.8 (5382.1-15004.5) | 3.175 | 19.7 (11.4-31.3) | 20.4 (11.8-32.6) | 0.113 (0.105-0.122) |
| Republic of Moldova | 2025.7 (1199.5-3080.8) | 2859.8 (1715.1-4366.8) | 0.412 | 117.4 (70.3-175) | 117.5 (70.8-177.4) | 0.024 (0.005-0.042) |
| Romania | 8915.3 (5753.6-13181.7) | 12348.2 (7756.7-18297.9) | 0.385 | 72.3 (46.5-107.4) | 75.9 (47.6-112.3) | 0.148 (0.135-0.161) |
| Russian Federation | 73037.1 (44217.5-111402.2) | 114896.4 (69305.9-172701.8) | 0.573 | 123.8 (75.6-187) | 123.8 (75.5-186.2) | 0.022 (0.005-0.039) |
| Rwanda | 528.9 (314.8-850.7) | 1109.3 (652.9-1722.4) | 1.097 | 45 (26.6-70.7) | 44.9 (26.1-70.1) | 0.002 (-0.011-0.014) |
| Saint Kitts and Nevis | 10.7 (6.3-17.5) | 19.4 (11.6-30.9) | 0.813 | 58.5 (34.4-94.8) | 60.7 (36.8-97.7) | 0.143 (0.13-0.156) |
| Saint Lucia | 23.6 (14-37.2) | 71.7 (42.8-114.1) | 2.038 | 59.7 (35.5-93.4) | 62.7 (37.3-100.1) | 0.193 (0.175-0.212) |
| Saint Vincent and the Grenadines | 19 (11.4-30) | 46.6 (27.9-74.2) | 1.453 | 59 (35.5-92.7) | 62.1 (37.3-98) | 0.176 (0.161-0.191) |
| Samoa | 26.2 (15.4-40.2) | 46.5 (27.3-71.5) | 0.775 | 69.2 (40.4-104.6) | 71.8 (42.9-111) | 0.129 (0.113-0.144) |
| San Marino | 5 (3-7.9) | 10.9 (6.2-17.3) | 1.180 | 30.5 (18.3-48.4) | 32.3 (18.8-50.6) | 0.285 (0.253-0.317) |
| Sao Tome and Principe | 12.6 (7.4-19.6) | 21.1 (12.4-33.5) | 0.675 | 42 (24.5-65.9) | 43 (25.4-67.8) | 0.056 (0.047-0.064) |
| Saudi Arabia | 1233 (747.2-1950.2) | 4306.8 (2627.4-6663.8) | 2.493 | 40.8 (24.8-64.4) | 42.7 (26-65.6) | 0.15 (0.143-0.158) |
| Senegal | 664.4 (398.6-1031.2) | 1529.4 (883.1-2390.7) | 1.302 | 42 (25.7-64.7) | 43.1 (25-67) | 0.085 (0.072-0.099) |
| Serbia | 3408.7 (2144.5-5121.6) | 5477.8 (3425.8-8163.6) | 0.607 | 66.9 (42.4-99.8) | 70.9 (44.5-105.6) | 0.181 (0.171-0.192) |
| Seychelles | 19.6 (11.8-30.6) | 46.3 (28-73.5) | 1.362 | 80.2 (48.2-124) | 84.4 (51.4-132.7) | 0.142 (0.12-0.164) |
| Sierra Leone | 420.2 (248.8-664.1) | 743.6 (449.1-1158.3) | 0.770 | 40.7 (24-63.9) | 41.8 (25.2-66.7) | 0.083 (0.073-0.094) |
| Singapore | 195.4 (112.9-311.6) | 902.1 (515.2-1450.4) | 3.617 | 20.4 (11.9-32.7) | 20.7 (11.8-32.9) | 0.055 (0.035-0.076) |
| Slovakia | 1700.2 (1054.2-2415.3) | 2939.2 (1813.9-4247.6) | 0.729 | 66.6 (41.3-94.2) | 69.3 (42.7-100) | 0.124 (0.119-0.128) |
| Slovenia | 429.8 (267.1-623.9) | 956.5 (608.1-1424.6) | 1.225 | 45.2 (28.4-66) | 47.4 (30.1-70.1) | 0.111 (0.092-0.129) |
| Solomon Islands | 44.7 (26.5-70.1) | 103.8 (62.1-157.1) | 1.322 | 68.5 (40.1-105.6) | 72 (42.4-109.7) | 0.18 (0.164-0.197) |
| Somalia | 417.6 (250.7-656.3) | 987.5 (569.2-1523.7) | 1.365 | 44.9 (26.7-70.7) | 45.2 (26.9-70.3) | -0.002 (-0.013-0.01) |
| South Africa | 5097.2 (3050.8-7983.4) | 11922.3 (7143.8-18546.7) | 1.339 | 61.7 (36.6-96.4) | 63.1 (37.8-98.2) | 0.075 (0.052-0.097) |
| South Sudan | 665.2 (390.1-1059) | 819.2 (483.6-1252.3) | 0.232 | 44.6 (26.5-70.2) | 44.6 (26.7-69.7) | -0.013 (-0.032-0.005) |
| Spain | 5895.3 (3450.1-9190) | 13169.8 (7940.7-20711.3) | 1.234 | 23.9 (14-37.1) | 31.4 (18.9-50.2) | 0.533 (0.384-0.682) |
| Sri Lanka | 4099.9 (2459.3-6281.9) | 10373.4 (6216.2-15807) | 1.530 | 80.1 (48.4-122.3) | 83.5 (50.5-127.1) | 0.141 (0.127-0.155) |
| Sudan | 1900.5 (1131.2-2978.1) | 4193.5 (2480.2-6597.2) | 1.207 | 40.4 (23.9-63) | 42.5 (25.1-67) | 0.128 (0.114-0.142) |
| Suriname | 68.2 (39.7-107.9) | 176 (106.6-283.7) | 1.581 | 58.3 (34.2-92.3) | 62 (37.4-100.1) | 0.245 (0.22-0.27) |
| Sweden | 3103.9 (1847.5-4956.4) | 4130.3 (2401-6604.7) | 0.331 | 45.9 (27.3-73.6) | 40.8 (24-65.5) | -0.118 (-0.212--0.025) |
| Switzerland | 4151.3 (2541.4-6035.2) | 8146.6 (5122.3-11794.4) | 0.962 | 94.3 (57.7-136.9) | 98.2 (61.8-142.1) | 0.138 (0.132-0.144) |
| Syrian Arab Republic | 1053.7 (617.7-1641.7) | 2865.8 (1694-4392.7) | 1.720 | 40.8 (23.7-63.5) | 42.4 (24.9-64.7) | 0.083 (0.071-0.095) |
| Taiwan (Province of China) | 6087.3 (3514.4-9405.6) | 16135.5 (9836.4-24590.1) | 1.651 | 78 (46.4-118.4) | 80.5 (49.5-122.3) | 0.089 (0.081-0.097) |
| Tajikistan | 604 (357.1-931.7) | 1470.9 (870.9-2326.7) | 1.435 | 55 (32.8-85.8) | 56.7 (33.5-88.3) | 0.099 (0.079-0.12) |
| Thailand | 11916.8 (7209.1-18649.7) | 41175 (25368.5-62981.8) | 2.455 | 78.8 (47.3-120.9) | 81.2 (49.6-124) | 0.041 (0.019-0.062) |
| Timor-Leste | 92.6 (54.7-145.7) | 340.8 (202.4-518.7) | 2.680 | 78.3 (46.2-124.2) | 81.1 (48.4-122.2) | 0.088 (0.079-0.098) |
| Togo | 223.5 (132-343.3) | 637.3 (376-989.6) | 1.851 | 41.3 (24.2-63.8) | 42.4 (24.9-66.1) | 0.046 (0.032-0.06) |
| Tokelau | 0.5 (0.3-0.7) | 0.5 (0.3-0.8) | 0.000 | 69.1 (40-107.4) | 71.6 (42.3-109.5) | 0.15 (0.134-0.166) |
| Tonga | 17.5 (10.3-27.6) | 25.6 (15-39.1) | 0.463 | 69.5 (40.6-108.4) | 71.9 (42.3-110.5) | 0.126 (0.11-0.141) |
| Trinidad and Tobago | 236.9 (142.4-381.6) | 597.9 (361.2-977.7) | 1.524 | 60 (36-95.9) | 62.3 (37.3-101.5) | 0.131 (0.112-0.15) |
| Tunisia | 1059.5 (633.7-1682.6) | 2768 (1638.9-4245.3) | 1.613 | 40.9 (24.3-63.6) | 42.4 (25.2-65) | 0.109 (0.096-0.122) |
| Turkey | 6295.3 (3632.9-9796.3) | 18365.3 (10923.7-28999.6) | 1.917 | 40.7 (23.8-63.8) | 41.6 (24.8-65.7) | 0.101 (0.081-0.121) |
| Turkmenistan | 391 (230.2-611.5) | 910.7 (526.4-1414.4) | 1.329 | 55 (32.9-86.2) | 56.1 (32.2-85.6) | 0.075 (0.054-0.095) |
| Tuvalu | 1.8 (1.1-2.9) | 3.3 (1.9-5.1) | 0.833 | 69.2 (40.3-107.2) | 72.7 (43.3-111.8) | 0.179 (0.163-0.195) |
| Uganda | 1333.8 (785.1-2108.5) | 2653 (1588.5-4200.6) | 0.989 | 45 (26.5-70.3) | 45.6 (27.5-71.6) | 0.017 (0.005-0.03) |
| Ukraine | 31292.4 (19208.8-47420.7) | 37602.1 (22411.4-56948.2) | 0.202 | 124.9 (76.8-189) | 124.8 (74.9-187.7) | 0.023 (-0.002-0.047) |
| United Arab Emirates | 89.8 (52.8-141.9) | 1333.2 (775.9-2125) | 13.846 | 41.9 (25-64.8) | 44 (26.5-69) | 0.145 (0.125-0.166) |
| United Kingdom | 19083.1 (12076.3-28887.2) | 30332 (19226.3-45811.6) | 0.589 | 48.4 (30.7-72.9) | 50 (31.5-75.3) | 0.308 (0.247-0.369) |
| United Republic of Tanzania | 2279.8 (1354.2-3649) | 5175 (3049-8106.3) | 1.270 | 44.6 (26.4-70) | 45.4 (26.9-72.1) | 0.046 (0.035-0.058) |
| United States of America | 49000 (30879.7-74096.9) | 95932.9 (60585.4-138068.6) | 0.958 | 36.4 (23-54.7) | 35.4 (22.4-51) | 0.197 (0.121-0.274) |
| United States Virgin Islands | 21.2 (12.5-33.7) | 56.2 (33.9-89.3) | 1.651 | 57.8 (34.5-90.8) | 60.7 (36.6-96) | 0.195 (0.169-0.22) |
| Uruguay | 422.9 (247.4-656) | 595 (349.3-912.8) | 0.407 | 24.1 (14.1-37.3) | 25.5 (14.9-39.3) | 0.264 (0.204-0.324) |
| Uzbekistan | 2382.7 (1397.3-3718.4) | 6224.4 (3675.7-9686.7) | 1.612 | 54.7 (32-86.2) | 56.4 (33.5-86.2) | 0.086 (0.069-0.103) |
| Vanuatu | 19.9 (11.3-30.8) | 52.8 (31.6-81.5) | 1.653 | 68.9 (39.7-104.9) | 71.8 (41.9-110.8) | 0.172 (0.151-0.192) |
| Venezuela (Bolivarian Republic of) | 3587.1 (2152-5544.8) | 12315.1 (7450.5-19580.6) | 2.433 | 85.9 (52.1-130.6) | 90.1 (55.4-141.9) | 0.164 (0.147-0.181) |
| Viet Nam | 14008.4 (8279.2-21370) | 39896.4 (24341.7-60449.1) | 1.848 | 85.6 (50.8-130.5) | 95.9 (58.5-146.5) | 0.186 (0.122-0.25) |
| Yemen | 867.7 (502.3-1368.5) | 2624.3 (1545.8-4094.7) | 2.024 | 40.1 (23.3-63.5) | 41.3 (24.5-64.6) | 0.077 (0.068-0.087) |
| Zambia | 626.8 (369-981.8) | 1318.3 (799.7-2052.7) | 1.103 | 45 (26.7-70) | 45.3 (27.5-71.1) | 0.005 (-0.003-0.013) |
| Zimbabwe | 1087.7 (637.3-1701.5) | 1554 (929.5-2415.8) | 0.429 | 56.6 (33.9-88.3) | 58.6 (35.6-90.1) | 0.104 (0.091-0.117) |

| **Table S7 The prevalence of benign prostatic hyperplasia cases and rates in 1990 and 2021, and the trends in age patterns from 1990 to 2021** | | | | | | | |
| --- | --- | --- | --- | --- | --- | --- | --- |
| **location** | **Age group** | **Prevalent cases** | | | **Prevalent rates** | | |
| **1990_thousand (95% UI)** | **2021_thousand (95% UI)** | **percentage change (100%)** | 1990_per 100 000 (95% UI） | **2021_per 100 000(95% UI)** | **EAPC (95% CI)** |
| Global | 40-44 years | 127.4 (70-209.6) | 232.4 (136.5-372.1) | 0.824 | 87.1 (47.9-143.3) | 92.1 (54.1-147.6) | 0.078 (-0.005-0.161) |
| 45-49 years | 866 (446.9-1510) | 1617.8 (866.7-2794.5) | 0.868 | 731.5 (377.5-1275.4) | 680.1 (364.4-1174.8) | -0.048 (-0.154-0.058) |
| 50-54 years | 2646.8 (1778.2-3985.3) | 4725.1 (3198.5-7044.7) | 0.785 | 2458.6 (1651.7-3701.9) | 2128.6 (1440.9-3173.6) | -0.135 (-0.273-0.003) |
| 55-59 years | 5731.4 (3769.5-8558.4) | 10655.9 (7065.2-15628.5) | 0.859 | 6170.3 (4058.1-9213.6) | 5472.3 (3628.3-8026) | -0.116 (-0.225--0.006) |
| 60-64 years | 9449.6 (6288.4-14120.9) | 17259.8 (11665.3-25420.8) | 0.827 | 12030.6 (8006-17977.9) | 11096.9 (7500-16343.9) | -0.149 (-0.246--0.052) |
| 65-69 years | 10947.1 (7720.5-15101.4) | 24161.8 (17426.2-32578.7) | 1.207 | 19094.5 (13466.5-26340.6) | 18327.6 (13218.3-24712.1) | -0.084 (-0.122--0.046) |
| 70-74 years | 9490.8 (6420.7-13181.9) | 23887.2 (16557.1-32694.2) | 1.517 | 25229 (17067.9-35041.1) | 24781.4 (17176.9-33918.2) | 0.036 (0-0.073) |
| 75-79 years | 6853.6 (4959-8939.4) | 15959.7 (11791.5-20939.5) | 1.329 | 27161.6 (19652.9-35427.5) | 26694.5 (19722.7-35023.6) | 0.102 (0.051-0.154) |
| 80-84 years | 3326.5 (2498-4327.3) | 9257.9 (7029.2-11902.4) | 1.783 | 25042.4 (18805.7-32576.4) | 25258.9 (19178.2-32474.2) | 0.15 (0.103-0.198) |
| 85-89 years | 1039.5 (770.3-1367.3) | 3608.5 (2703.1-4671.6) | 2.471 | 20527 (15211.6-27001) | 20915.8 (15668-27077.6) | 0.148 (0.108-0.189) |
| 90-94 years | 194.7 (137.9-255.7) | 945.7 (688.9-1215.4) | 3.857 | 15466.2 (10950.1-20309.1) | 16225.5 (11820-20853.2) | 0.181 (0.138-0.224) |
| 95+ years | 32.5 (22.5-43.9) | 190.3 (136.2-250.7) | 4.855 | 12478.4 (8641.3-16869.6) | 12586 (9010-16579.5) | 0.033 (-0.015-0.08) |
| Low SDI | 40-44 years | 8.8 (4.6-15.3) | 21.6 (11.3-37.8) | 1.455 | 87.6 (45.9-152.9) | 84.6 (44.5-148.3) | -0.052 (-0.08--0.024) |
| 45-49 years | 67.1 (34.1-117.9) | 160.1 (81.1-279.3) | 1.386 | 789.4 (401.2-1386.9) | 764.9 (387.3-1334.3) | -0.031 (-0.058--0.004) |
| 50-54 years | 183.9 (119.5-281.3) | 412.5 (268.3-635) | 1.243 | 2567.8 (1669.3-3928.5) | 2508.7 (1631.5-3861.7) | -0.007 (-0.038-0.024) |
| 55-59 years | 376.8 (246.5-564.4) | 768.1 (501.3-1144) | 1.038 | 6238.6 (4082-9345.3) | 6097.8 (3979.9-9082) | 0.002 (-0.028-0.032) |
| 60-64 years | 557.5 (355.1-865.6) | 1113.5 (713.5-1691.5) | 0.997 | 11426 (7277.3-17741.2) | 11430.6 (7324.7-17364.8) | 0.058 (0.041-0.076) |
| 65-69 years | 623.6 (428-880.9) | 1374.1 (946-1909.6) | 1.203 | 17388.2 (11932.7-24562.4) | 18584.4 (12793.7-25826) | 0.209 (0.194-0.224) |
| 70-74 years | 533.9 (358-769) | 1265.6 (833.8-1793.1) | 1.370 | 22108.1 (14825-31841.5) | 25001.7 (16471.9-35420.5) | 0.298 (0.268-0.328) |
| 75-79 years | 313.3 (217.3-428.9) | 816 (561.3-1107.4) | 1.605 | 23199.7 (16086.8-31757.5) | 26358.5 (18132.2-35771.9) | 0.305 (0.273-0.337) |
| 80-84 years | 135 (96.1-181.8) | 377.7 (273-504) | 1.798 | 21707.7 (15448.4-29222.5) | 24255.7 (17534.4-32366.2) | 0.239 (0.209-0.268) |
| 85-89 years | 38 (26.8-52.4) | 119.9 (84.5-163) | 2.155 | 18242.8 (12845.2-25149.5) | 20293.3 (14306.4-27584.2) | 0.121 (0.041-0.2) |
| 90-94 years | 6.9 (4.6-9.5) | 24.7 (16.7-33.6) | 2.580 | 14485.4 (9649.5-20023.5) | 15986.2 (10810.6-21732.5) | 0.103 (-0.058-0.264) |
| 95+ years | 1.1 (0.7-1.5) | 3.6 (2.4-5.1) | 2.273 | 12665 (8238-17719.3) | 13108.5 (8672.4-18394.6) | 0.043 (-0.173-0.26) |
| Low-middle SDI | 40-44 years | 28.8 (15.3-49.7) | 58.8 (32.1-99.5) | 1.042 | 106 (56.4-183.3) | 102.2 (55.7-172.7) | -0.004 (-0.047-0.039) |
| 45-49 years | 220.2 (109.8-387.3) | 438.9 (222-772.6) | 0.993 | 960.7 (479-1689.6) | 894.6 (452.6-1575) | -0.042 (-0.118-0.034) |
| 50-54 years | 603.9 (393.4-913.5) | 1203.7 (787.1-1828.4) | 0.993 | 3134.9 (2042-4741.8) | 2890.4 (1889.9-4390.2) | -0.05 (-0.135-0.034) |
| 55-59 years | 1225.9 (795.1-1840.7) | 2396.1 (1546.1-3598.6) | 0.955 | 7654.3 (4964.3-11493.2) | 7015.3 (4526.6-10536.1) | -0.047 (-0.136-0.042) |
| 60-64 years | 1842.3 (1171.3-2799.4) | 3701.9 (2359.2-5683.4) | 1.009 | 14072 (8946.3-21382.1) | 13334.9 (8498.1-20472.4) | -0.007 (-0.07-0.056) |
| 65-69 years | 2029.6 (1403-2787.8) | 4779.9 (3295.2-6647.7) | 1.355 | 21994.5 (15204.1-30211.5) | 22390.2 (15435.4-31139.5) | 0.092 (0.078-0.106) |
| 70-74 years | 1721.7 (1157.8-2404.4) | 4536.2 (3045.7-6362.5) | 1.635 | 28087.5 (18888.2-39224.5) | 30299.9 (20343.9-42498.7) | 0.178 (0.148-0.207) |
| 75-79 years | 1090.8 (770-1463.6) | 2984.7 (2112.4-3979.5) | 1.736 | 28981.1 (20458.4-38886.9) | 31997.8 (22645.7-42662.4) | 0.244 (0.201-0.286) |
| 80-84 years | 537.2 (393.7-715) | 1483.2 (1088.1-1947) | 1.761 | 26517.8 (19435.6-35292.7) | 29302 (21496.6-38464.4) | 0.268 (0.236-0.3) |
| 85-89 years | 176.1 (126.4-238.1) | 523.8 (376.3-703.4) | 1.974 | 22326.6 (16028.6-30181.2) | 24610.4 (17679-33047.6) | 0.235 (0.198-0.272) |
| 90-94 years | 35.6 (24.4-48.3) | 129 (89.4-175) | 2.624 | 17604.9 (12073.1-23885.6) | 19227.4 (13327.4-26088.5) | 0.182 (0.143-0.221) |
| 95+ years | 6.1 (4.1-8.3) | 23.8 (16.2-32.8) | 2.902 | 14307.1 (9624.2-19528.9) | 14569.2 (9939.5-20107.8) | -0.125 (-0.196--0.054) |
| Middle SDI | 40-44 years | 35.3 (18.8-61.8) | 69.6 (37-115.5) | 0.972 | 78 (41.4-136.4) | 83.8 (44.5-139) | 0.316 (0.186-0.447) |
| 45-49 years | 247.9 (121.5-436.8) | 517.1 (270.1-904.7) | 1.086 | 679.4 (333-1196.9) | 634.1 (331.2-1109.4) | 0.118 (-0.065-0.302) |
| 50-54 years | 728 (477.6-1108.8) | 1587.7 (1074.1-2393.9) | 1.181 | 2286.6 (1500.1-3482.4) | 2039.6 (1379.8-3075.3) | 0.065 (-0.11-0.24) |
| 55-59 years | 1632 (1034.5-2497.5) | 3679.2 (2419.2-5436.5) | 1.254 | 5987.6 (3795.6-9163.4) | 5448.3 (3582.5-8050.6) | 0.128 (-0.021-0.277) |
| 60-64 years | 2600.5 (1680.2-3963.3) | 5804.5 (3907.3-8631.9) | 1.232 | 12027.2 (7771.1-18330.4) | 11698.2 (7874.6-17396.5) | 0.068 (-0.051-0.186) |
| 65-69 years | 3254.9 (2236.2-4503.7) | 8461 (6014.7-11605) | 1.599 | 21030.4 (14448.8-29099.1) | 19683.3 (13992.4-26997.4) | 0.005 (-0.069-0.079) |
| 70-74 years | 2982.2 (1992.4-4190.1) | 8129.6 (5544.2-11341.8) | 1.726 | 29437.3 (19666.5-41360.8) | 27763 (18933.7-38733) | 0.011 (-0.053-0.075) |
| 75-79 years | 1964.5 (1413.5-2585.4) | 5676.6 (4151.3-7484.2) | 1.890 | 33495.7 (24100.8-44082.6) | 31509.7 (23043.1-41543.6) | -0.023 (-0.089-0.044) |
| 80-84 years | 942.7 (698.2-1237.9) | 3182.5 (2405.9-4158.7) | 2.376 | 32997 (24439.3-43331) | 31041.8 (23466.7-40563.4) | -0.05 (-0.114-0.014) |
| 85-89 years | 297.7 (215.2-394.4) | 1196.1 (877.8-1556.5) | 3.018 | 27944.5 (20193.4-37020.2) | 27104.6 (19892.6-35271.8) | -0.016 (-0.056-0.023) |
| 90-94 years | 51.6 (36-68.7) | 279 (196.3-364) | 4.407 | 20783 (14484.1-27691.3) | 21300.6 (14985.4-27796.2) | 0.096 (0.082-0.11) |
| 95+ years | 7.9 (5.4-10.7) | 54.3 (37-72.9) | 5.873 | 15957.9 (10894.5-21697.1) | 16288.7 (11090.7-21843.6) | 0.064 (0.038-0.09) |
| High-middle SDI | 40-44 years | 25.8 (13.9-44.9) | 33.1 (18-56.1) | 0.283 | 81.4 (43.7-141.6) | 70.7 (38.5-119.7) | -0.452 (-0.636--0.268) |
| 45-49 years | 176.5 (89.9-313.3) | 268.4 (139.8-469.8) | 0.521 | 709.3 (361.1-1259) | 551.4 (287.1-965.2) | -0.742 (-0.885--0.6) |
| 50-54 years | 709 (470.9-1079) | 875.8 (600.1-1290.9) | 0.235 | 2703 (1795-4113.5) | 1808.9 (1239.4-2666.3) | -0.908 (-1.114--0.7) |
| 55-59 years | 1540.6 (1005.2-2304.1) | 2266.3 (1528.9-3313.3) | 0.471 | 6794.1 (4433.1-10161.2) | 5143.4 (3469.8-7519.6) | -0.683 (-0.836--0.53) |
| 60-64 years | 2809.7 (1870.3-4146) | 4004.4 (2747-5826.5) | 0.425 | 14065.7 (9363-20755.2) | 11458.2 (7860.3-16671.7) | -0.664 (-0.82--0.508) |
| 65-69 years | 2938.4 (2080.2-3987.3) | 5873.4 (4210.9-7905.5) | 0.999 | 21611.4 (15299.1-29325.6) | 18983.1 (13609.8-25551) | -0.536 (-0.641--0.431) |
| 70-74 years | 2420 (1658.6-3329.1) | 5787.2 (4036.2-7842.7) | 1.391 | 28764.3 (19714.5-39569.4) | 26346.6 (18375.1-35704.5) | -0.274 (-0.383--0.164) |
| 75-79 years | 1983.4 (1466.1-2546) | 3579.8 (2653.2-4615.6) | 0.805 | 32521.9 (24039.2-41747.1) | 27613 (20465.5-35602.3) | -0.15 (-0.268--0.031) |
| 80-84 years | 930.3 (705-1203.9) | 2381.4 (1827-3070.9) | 1.560 | 29918.6 (22672.5-38719.2) | 28305.5 (21715.5-36500.4) | -0.019 (-0.12-0.081) |
| 85-89 years | 262.4 (192.3-340.9) | 918.8 (672.5-1188.9) | 2.502 | 24230 (17755.7-31482.5) | 23380.6 (17113.4-30251.8) | 0.057 (-0.056-0.171) |
| 90-94 years | 42.9 (30.2-56) | 233.7 (166.2-299.6) | 4.448 | 17885.4 (12576.5-23305.1) | 18342 (13047-23518.5) | 0.269 (0.051-0.487) |
| 95+ years | 6 (4.1-8.2) | 37 (25.6-50.4) | 5.167 | 13553.8 (9366.3-18735.6) | 13375.1 (9250.6-18221.5) | 0.113 (-0.237-0.464) |
| High SDI | 40-44 years | 28.5 (15.3-49.4) | 49 (31.7-68.7) | 0.719 | 89.4 (47.9-154.7) | 125.8 (81.6-176.4) | 0.536 (0.233-0.84) |
| 45-49 years | 153.4 (92.1-242.4) | 231.9 (155.8-340.6) | 0.512 | 602.1 (361.5-951.5) | 619.1 (416-909.2) | 0.255 (0.166-0.344) |
| 50-54 years | 419.1 (292.7-609.1) | 641.1 (474-888.4) | 0.530 | 1818.4 (1269.7-2642.7) | 1711.5 (1265.5-2371.7) | 0.188 (0.089-0.287) |
| 55-59 years | 949.5 (662.4-1323.6) | 1536.2 (1131.6-2041.7) | 0.618 | 4564.1 (3184-6362.2) | 4240.6 (3123.6-5636.1) | 0.063 (-0.031-0.157) |
| 60-64 years | 1628 (1129.9-2303.2) | 2618.6 (1908.7-3508.3) | 0.608 | 8617.2 (5980.8-12191.2) | 7855.9 (5726.2-10524.8) | -0.044 (-0.137-0.049) |
| 65-69 years | 2085.5 (1559.2-2757.6) | 3650 (2868.4-4655.8) | 0.750 | 13562 (10139.2-17932.4) | 12563 (9872.6-16024.7) | -0.04 (-0.128-0.048) |
| 70-74 years | 1821 (1302-2448.3) | 4145.2 (3107.8-5361.5) | 1.276 | 17358.7 (12411-23337.9) | 16562.7 (12417.6-21422.2) | -0.003 (-0.065-0.059) |
| 75-79 years | 1491.9 (1099.7-1930.4) | 2887.1 (2241.8-3653.6) | 0.935 | 18363.7 (13536-23760.6) | 17678.7 (13727.3-22372.2) | 0.031 (-0.025-0.087) |
| 80-84 years | 776.3 (594.2-995.1) | 1824.3 (1457.2-2270.4) | 1.350 | 16687.9 (12773.1-21391.6) | 16095.2 (12856.5-20031.7) | 0.077 (0.019-0.136) |
| 85-89 years | 263.7 (202.5-339.5) | 846.3 (676.4-1055.3) | 2.209 | 13792.3 (10595.4-17760.8) | 13707.4 (10956.1-17093.6) | 0.196 (0.132-0.259) |
| 90-94 years | 57.5 (42-73.5) | 278.3 (218.4-343.1) | 3.840 | 11060.9 (8074.5-14136.9) | 11534.2 (9048.4-14215.7) | 0.27 (0.209-0.332) |
| 95+ years | 11.4 (8.1-15.5) | 71.3 (54.3-91) | 5.254 | 9888.9 (7040.3-13406.2) | 10059.1 (7654.8-12826.7) | 0.072 (-0.011-0.155) |

| **Table S8. The Incidence of benign prostatic hyperplasia cases and rates in 1990 and 2021, and the trends in age patterns from 1990 to 2021** | | | | | | | |
| --- | --- | --- | --- | --- | --- | --- | --- |
| **location** |  | **Incident cases** | | | **Incident rates** | | |
| **Age group** | **1990_thousand (95% UI)** | **2021_thousand (95% UI)** | **percentage change (100%)** | **1990_per 100 000 (95% UI)** | **2021_per 100 000 (95% UI)** | **EAPC (95% CI)** |
| Global | 40-44 years | 83.4 (46-143.1) | 145.8 (84.8-244) | 0.748 | 57 (31.4-97.8) | 57.8 (33.6-96.8) | 0.067 (-0.026-0.159) |
| 45-49 years | 239.3 (117.9-410.2) | 433.3 (216.6-740.9) | 0.811 | 202.1 (99.6-346.5) | 182.1 (91.1-311.5) | -0.073 (-0.212-0.067) |
| 50-54 years | 610.3 (395.5-920.5) | 1093.3 (718.5-1631.9) | 0.791 | 566.9 (367.4-855.1) | 492.5 (323.7-735.2) | -0.142 (-0.276--0.008) |
| 55-59 years | 992.3 (500-1649.7) | 1878.9 (1009.9-3008.5) | 0.893 | 1068.2 (538.3-1776) | 964.9 (518.6-1545) | -0.102 (-0.197--0.007) |
| 60-64 years | 1447.5 (974.8-2014.3) | 2748.1 (1892.2-3800.8) | 0.899 | 1842.8 (1241-2564.5) | 1766.9 (1216.6-2443.6) | -0.054 (-0.124-0.017) |
| 65-69 years | 1465.9 (821.5-2262.2) | 3419.4 (1980.2-5217.5) | 1.333 | 2556.9 (1432.9-3945.9) | 2593.8 (1502.1-3957.6) | 0.053 (0.024-0.082) |
| 70-74 years | 917.6 (603.3-1247.3) | 2373.9 (1624.7-3144) | 1.587 | 2439.2 (1603.8-3315.7) | 2462.7 (1685.5-3261.7) | 0.133 (0.099-0.167) |
| 75-79 years | 460.3 (297.8-690.3) | 1110.8 (723.7-1622.7) | 1.413 | 1824 (1180.4-2735.6) | 1857.9 (1210.5-2714.2) | 0.207 (0.158-0.257) |
| 80-84 years | 155 (63.5-261.1) | 450 (194.1-740) | 1.903 | 1166.9 (477.9-1966) | 1227.7 (529.5-2018.9) | 0.323 (0.264-0.383) |
| 85-89 years | 28.9 (11.9-48.5) | 105.5 (44.8-175.2) | 2.651 | 570.4 (235.8-957.5) | 611.6 (259.7-1015.6) | 0.328 (0.296-0.36) |
| 90-94 years | 4.4 (1.6-9.5) | 21.7 (8.1-45.5) | 3.932 | 351.1 (126.6-754.1) | 372.5 (139.6-780.5) | 0.201 (0.115-0.287) |
| 95+ years | 1.3 (0.5-2.7) | 6.8 (2.9-14.5) | 4.231 | 495.2 (210.2-1049.8) | 450.9 (192.1-958.2) | -0.376 (-0.488--0.264) |
| Low SDI | 40-44 years | 6 (3.1-10.7) | 14.7 (7.7-26.2) | 1.450 | 59.8 (31.2-106.5) | 57.7 (30.3-102.7) | -0.053 (-0.083--0.022) |
| 45-49 years | 19 (9.3-34) | 45.2 (22.5-80.8) | 1.379 | 223.2 (109.9-400.3) | 216.2 (107.4-386.1) | -0.032 (-0.06--0.004) |
| 50-54 years | 40 (25.9-60.1) | 89.6 (57.6-134.6) | 1.240 | 559 (361.9-839.6) | 545.1 (350.2-818.6) | -0.009 (-0.041-0.024) |
| 55-59 years | 62.3 (30.1-107.6) | 126.9 (61.8-216.9) | 1.037 | 1031.9 (498.3-1781.7) | 1007.3 (490.8-1721.8) | -0.003 (-0.034-0.028) |
| 60-64 years | 77.4 (50.6-110.9) | 162.2 (107.1-232.8) | 1.096 | 1585.5 (1037.4-2272.9) | 1665.2 (1099.1-2389.9) | 0.108 (0.086-0.13) |
| 65-69 years | 77.2 (41.9-123.3) | 180.1 (97.4-285.5) | 1.333 | 2152.5 (1167.5-3438.3) | 2435.3 (1317.9-3861.1) | 0.283 (0.235-0.331) |
| 70-74 years | 49.3 (28.7-72.2) | 118.4 (72.4-167.4) | 1.402 | 2043.2 (1186.7-2989.4) | 2338.7 (1430.6-3307.1) | 0.292 (0.251-0.334) |
| 75-79 years | 20.2 (13.1-30.9) | 51.4 (33.5-77.9) | 1.545 | 1497.7 (966.7-2287.3) | 1658.8 (1081-2517.3) | 0.234 (0.205-0.264) |
| 80-84 years | 6.4 (2.3-11.5) | 17.2 (6.3-30.9) | 1.688 | 1029.2 (371.2-1854.3) | 1107.5 (402.8-1984.8) | 0.163 (0.141-0.185) |
| 85-89 years | 1.2 (0.4-2.1) | 3.6 (1.4-6.3) | 2.000 | 577.4 (208.9-1014.9) | 612.7 (231.9-1058.1) | 0.07 (0.027-0.113) |
| 90-94 years | 0.2 (0.1-0.4) | 0.7 (0.2-1.5) | 2.500 | 431.2 (155.5-915) | 448.1 (160.4-944.2) | 0.035 (-0.011-0.081) |
| 95+ years | 0.1 (0-0.1) | 0.2 (0.1-0.4) | 1.000 | 619.1 (255.2-1339.1) | 627.8 (253.6-1339.2) | 0.005 (-0.036-0.045) |
| Low-middle SDI | 40-44 years | 19.7 (10-34.5) | 39.4 (20.5-69.7) | 1.000 | 72.5 (37-127.2) | 68.5 (35.5-121.1) | -0.03 (-0.089-0.029) |
| 45-49 years | 62.3 (30.7-111.1) | 122.7 (60.5-219.9) | 0.970 | 271.6 (134.1-484.9) | 250.2 (123.3-448.2) | -0.059 (-0.143-0.025) |
| 50-54 years | 131.1 (83.2-198.8) | 261 (165.6-399.1) | 0.991 | 680.8 (431.8-1032.2) | 626.6 (397.7-958.4) | -0.041 (-0.126-0.044) |
| 55-59 years | 199.8 (96.4-343.1) | 393.6 (186.2-672.9) | 0.970 | 1247.8 (602.1-2142.6) | 1152.4 (545-1970.1) | -0.024 (-0.108-0.06) |
| 60-64 years | 258.7 (171.7-366.3) | 562 (379.1-792.4) | 1.172 | 1975.8 (1311.6-2797.8) | 2024.3 (1365.6-2854.4) | 0.079 (0.072-0.086) |
| 65-69 years | 252.3 (137.9-392.5) | 647.1 (361.3-998.8) | 1.565 | 2734.6 (1494.3-4253.2) | 3031.2 (1692.2-4678.6) | 0.187 (0.129-0.244) |
| 70-74 years | 153.8 (94.4-216.5) | 419.8 (265.3-574.7) | 1.730 | 2508.7 (1539.5-3531.4) | 2804.4 (1772.3-3839.1) | 0.209 (0.148-0.27) |
| 75-79 years | 66 (43.1-99.1) | 179.1 (118.1-270) | 1.714 | 1753.5 (1145-2634.3) | 1920.3 (1266.4-2894.5) | 0.21 (0.167-0.253) |
| 80-84 years | 23.4 (8.4-42.2) | 62.7 (23.1-112) | 1.679 | 1154.7 (414.2-2081.4) | 1238.7 (457.1-2213.2) | 0.183 (0.162-0.204) |
| 85-89 years | 5 (1.9-8.6) | 14 (5.5-24.1) | 1.800 | 627.9 (237.4-1089.3) | 658.9 (257.2-1132.9) | 0.095 (0.069-0.121) |
| 90-94 years | 0.9 (0.3-1.8) | 2.8 (1-6.1) | 2.111 | 422.4 (152.2-904.6) | 421.8 (150.5-913.1) | -0.112 (-0.163--0.061) |
| 95+ years | 0.2 (0.1-0.5) | 0.8 (0.3-1.9) | 3.000 | 565.1 (231.2-1228.4) | 515.3 (211.5-1136.2) | -0.494 (-0.571--0.417) |
| Middle SDI | 40-44 years | 23.5 (12.2-42) | 44.9 (24.5-78.1) | 0.911 | 51.9 (26.8-92.7) | 54 (29.5-94) | 0.295 (0.135-0.456) |
| 45-49 years | 69.2 (33-120.3) | 141 (67.8-243.4) | 1.038 | 189.5 (90.3-329.8) | 172.9 (83.2-298.5) | 0.096 (-0.107-0.3) |
| 50-54 years | 173.3 (108.2-267.5) | 383.6 (250.8-576.2) | 1.214 | 544.4 (339.8-840.3) | 492.8 (322.2-740.2) | 0.047 (-0.104-0.198) |
| 55-59 years | 289 (141.7-493.4) | 664.5 (357.7-1070.7) | 1.299 | 1060.4 (520-1810.1) | 984 (529.7-1585.6) | 0.115 (-0.008-0.238) |
| 60-64 years | 424.7 (284-601.2) | 961.3 (661.3-1349) | 1.263 | 1964.1 (1313.5-2780.8) | 1937.4 (1332.7-2718.8) | 0.066 (-0.01-0.141) |
| 65-69 years | 465.5 (247.1-729.4) | 1248.6 (699.4-1945.6) | 1.682 | 3007.6 (1596.8-4713) | 2904.8 (1627.2-4526.3) | 0.037 (-0.012-0.086) |
| 70-74 years | 307.7 (204.1-416.1) | 843.1 (583.9-1117.8) | 1.740 | 3037.6 (2014.6-4107.5) | 2879.1 (1994.1-3817.5) | 0.005 (-0.053-0.062) |
| 75-79 years | 149.6 (92-227.4) | 423.5 (266.4-633) | 1.831 | 2550.3 (1568.9-3876.5) | 2350.6 (1478.7-3513.8) | -0.037 (-0.132-0.058) |
| 80-84 years | 49.3 (20.5-81.6) | 170.3 (73.2-279.4) | 2.454 | 1726.1 (717.3-2854.8) | 1660.9 (714.1-2725.3) | 0.027 (-0.06-0.115) |
| 85-89 years | 8.5 (3.5-14.1) | 36.5 (15.3-60.7) | 3.294 | 798.3 (331.3-1326.8) | 826.2 (346.7-1375) | 0.148 (0.092-0.204) |
| 90-94 years | 1.1 (0.4-2.4) | 6 (2.1-13.1) | 4.455 | 428.9 (146.5-950.2) | 457.4 (158.7-1000.9) | 0.153 (0.076-0.23) |
| 95+ years | 0.3 (0.1-0.6) | 1.8 (0.7-3.9) | 5.000 | 551.5 (226.5-1201.6) | 535 (216.4-1159.2) | -0.229 (-0.324--0.133) |
| High-middle SDI | 40-44 years | 17.3 (9-30.6) | 21.7 (11.8-37.4) | 0.254 | 54.6 (28.3-96.4) | 46.2 (25.3-79.8) | -0.521 (-0.726--0.316) |
| 45-49 years | 49.4 (24.5-87.5) | 73.8 (36.8-128) | 0.494 | 198.4 (98.6-351.7) | 151.6 (75.6-262.9) | -0.785 (-0.936--0.635) |
| 50-54 years | 171.2 (108.4-261.3) | 218.6 (143-326) | 0.277 | 652.5 (413.3-996.2) | 451.6 (295.4-673.3) | -0.835 (-1.03--0.639) |
| 55-59 years | 272.4 (139.3-453.3) | 415.5 (225.9-667.9) | 0.525 | 1201.2 (614.2-1999.3) | 943.1 (512.8-1515.9) | -0.611 (-0.756--0.466) |
| 60-64 years | 442.5 (303.2-618) | 652.3 (450.4-900.9) | 0.474 | 2215.4 (1518-3093.6) | 1866.4 (1288.7-2577.8) | -0.497 (-0.632--0.362) |
| 65-69 years | 400.8 (224-605.8) | 841.5 (477.7-1269.2) | 1.100 | 2947.6 (1647.5-4455.9) | 2719.7 (1544-4102) | -0.313 (-0.389--0.237) |
| 70-74 years | 238.4 (160.1-317.6) | 590 (413.1-767.4) | 1.475 | 2833.6 (1902.4-3775.1) | 2686.1 (1880.5-3493.8) | -0.08 (-0.15--0.01) |
| 75-79 years | 134.1 (85.7-198.9) | 278.6 (176-411.4) | 1.078 | 2198.6 (1405.8-3261.7) | 2148.8 (1357.3-3173.2) | 0.109 (0.053-0.164) |
| 80-84 years | 43.7 (18.3-72.6) | 125 (55.4-203.6) | 1.860 | 1406.4 (588.8-2335.9) | 1485.5 (658.4-2420.2) | 0.289 (0.188-0.39) |
| 85-89 years | 7 (2.9-11.5) | 27.6 (12.2-45.6) | 2.943 | 642.4 (272.2-1065) | 703 (310.5-1160.7) | 0.398 (0.332-0.464) |
| 90-94 years | 0.8 (0.3-1.7) | 4.8 (1.7-10.6) | 5.000 | 321.8 (109.5-716.8) | 376.7 (132.7-832.5) | 0.623 (0.422-0.823) |
| 95+ years | 0.2 (0.1-0.4) | 1.2 (0.5-2.7) | 5.000 | 413.2 (167.8-908.5) | 442.2 (187.1-967.1) | 0.247 (-0.053-0.548) |
| High SDI | 40-44 years | 16.8 (10.4-26.1) | 25 (17.6-35.1) | 0.488 | 52.7 (32.5-81.6) | 64.3 (45.3-90.2) | 0.369 (0.187-0.552) |
| 45-49 years | 39.3 (19.7-66) | 50.1 (26.4-84.2) | 0.275 | 154.2 (77.4-259.3) | 133.8 (70.5-224.8) | -0.011 (-0.164-0.142) |
| 50-54 years | 93.9 (64.9-132.1) | 139.4 (100.2-187.7) | 0.485 | 407.5 (281.4-573) | 372.2 (267.6-501.2) | 0.049 (-0.066-0.165) |
| 55-59 years | 167.5 (94.3-256.6) | 276.5 (162.8-403.6) | 0.651 | 805.1 (453.1-1233.7) | 763.4 (449.4-1114.2) | 0.04 (-0.03-0.111) |
| 60-64 years | 242.4 (170.2-326.1) | 407.7 (302.9-533.5) | 0.682 | 1283.1 (900.7-1725.9) | 1223.1 (908.6-1600.4) | 0.119 (0.004-0.233) |
| 65-69 years | 268 (160.5-397) | 498.9 (319.3-716.5) | 0.862 | 1742.7 (1043.5-2581.8) | 1717.1 (1099.1-2466.3) | 0.189 (0.058-0.32) |
| 70-74 years | 167.2 (108.9-231.1) | 400.3 (273.2-546.9) | 1.394 | 1594.2 (1038.2-2203.3) | 1599.4 (1091.7-2185.4) | 0.224 (0.127-0.322) |
| 75-79 years | 89.8 (61.2-128.5) | 177.3 (121.5-244.4) | 0.974 | 1105 (752.8-1581.7) | 1085.6 (744.2-1496.6) | 0.193 (0.095-0.29) |
| 80-84 years | 32 (13.5-54.3) | 74.4 (35.2-120.9) | 1.325 | 687.2 (289.8-1167.9) | 656.4 (310.9-1066.3) | 0.259 (0.102-0.416) |
| 85-89 years | 7.2 (2.9-12.3) | 23.7 (10.5-40.2) | 2.292 | 378 (151.2-644.7) | 383.9 (169.9-651.5) | 0.423 (0.26-0.586) |
| 90-94 years | 1.5 (0.6-3.1) | 7.4 (3.1-14.2) | 3.933 | 292.8 (111.8-600.8) | 305.9 (129.4-587.6) | 0.271 (0.101-0.44) |
| 95+ years | 0.5 (0.2-1.1) | 2.8 (1.2-6.2) | 4.600 | 467.6 (197.1-986.1) | 393.2 (171.2-868) | -0.603 (-0.784--0.421) |

| **Table S9. The DALYs of benign prostatic hyperplasia cases and rates in 1990 and 2021, and the trends in age patterns from 1990 to 2021** | | | | | | | |
| --- | --- | --- | --- | --- | --- | --- | --- |
| **location** |  | **DALYs cases** | | | **DALYs rates** | | |
| **Age group** | **1990_thousand (95% UI)** | **2021_thousand (95% UI)** | **percentage change (100%)** | **1990_per 100 000 (95% UI)** | **2021_per 100 000 (95% UI)** | **EAPC (95% CI)** |
| Global | 40-44 years | 2.7 (1.3-5.2) | 4.9 (2.5-8.7) | 0.815 | 1.8 (0.9-3.5) | 1.9 (1-3.5) | 0.087 (0.007-0.167) |
| 45-49 years | 18.1 (8.1-34.5) | 33.8 (16-63.1) | 0.867 | 15.2 (6.8-29.1) | 14.2 (6.7-26.5) | -0.04 (-0.146-0.067) |
| 50-54 years | 54.8 (29.5-93.4) | 98 (53.4-165.5) | 0.788 | 50.9 (27.4-86.8) | 44.1 (24.1-74.5) | -0.125 (-0.263-0.014) |
| 55-59 years | 117.7 (64-196.5) | 219.1 (121.2-363.1) | 0.862 | 126.7 (68.9-211.5) | 112.5 (62.2-186.5) | -0.106 (-0.215-0.004) |
| 60-64 years | 191.8 (105.3-318) | 350.8 (196.3-576.6) | 0.829 | 244.2 (134.1-404.8) | 225.6 (126.2-370.7) | -0.138 (-0.235--0.042) |
| 65-69 years | 219.1 (129.1-351) | 484 (288.5-778.1) | 1.209 | 382.2 (225.1-612.2) | 367.1 (218.8-590.2) | -0.074 (-0.113--0.036) |
| 70-74 years | 187 (107.8-296.3) | 470.8 (277.1-750.7) | 1.518 | 497.1 (286.5-787.8) | 488.4 (287.5-778.8) | 0.043 (0.007-0.079) |
| 75-79 years | 132.9 (78.3-209.5) | 309.4 (183.9-484) | 1.328 | 526.6 (310.2-830.4) | 517.5 (307.5-809.5) | 0.106 (0.054-0.159) |
| 80-84 years | 63.4 (35.6-96.7) | 176.5 (99.5-267.6) | 1.784 | 477.4 (268.2-728.1) | 481.6 (271.4-730.2) | 0.155 (0.106-0.203) |
| 85-89 years | 19.5 (10.7-29.1) | 67.6 (37.6-100.1) | 2.467 | 384.6 (212-574.9) | 391.8 (218.2-580.4) | 0.154 (0.111-0.197) |
| 90-94 years | 3.6 (1.9-5.4) | 17.4 (9.4-26.1) | 3.833 | 284.6 (150.4-431.1) | 298.9 (161.7-448.1) | 0.189 (0.143-0.236) |
| 95+ years | 0.6 (0.3-0.9) | 3.4 (1.8-5.3) | 4.667 | 224.8 (118.5-350.2) | 227.4 (121.1-347.4) | 0.043 (-0.009-0.096) |
| Low SDI | 40-44 years | 0.2 (0.1-0.4) | 0.5 (0.2-0.9) | 1.500 | 1.8 (0.8-3.6) | 1.8 (0.8-3.5) | -0.023 (-0.058-0.011) |
| 45-49 years | 1.4 (0.6-2.7) | 3.3 (1.4-6.4) | 1.357 | 16.4 (7.5-31.7) | 16 (6.8-30.6) | -0.016 (-0.043-0.012) |
| 50-54 years | 3.8 (1.9-6.6) | 8.5 (4.4-14.7) | 1.237 | 52.9 (26.8-91.5) | 51.9 (26.8-89.3) | 0.015 (-0.016-0.047) |
| 55-59 years | 7.7 (4.2-12.8) | 15.8 (8.5-26.3) | 1.052 | 127.4 (69.6-212.5) | 125.1 (67.5-208.6) | 0.024 (-0.008-0.055) |
| 60-64 years | 11.3 (6.1-18.9) | 22.6 (12.3-38) | 1.000 | 231 (124-387.1) | 232 (126.7-390.6) | 0.082 (0.062-0.101) |
| 65-69 years | 12.4 (7.1-20.3) | 27.5 (15.8-44.7) | 1.218 | 345.7 (198.8-567.1) | 371.6 (213.8-604.2) | 0.234 (0.219-0.249) |
| 70-74 years | 10.4 (5.8-17) | 24.8 (13.8-39.8) | 1.385 | 431.4 (239-702.1) | 490.4 (271.8-786.2) | 0.323 (0.295-0.352) |
| 75-79 years | 6 (3.4-9.6) | 15.6 (9-25.1) | 1.600 | 443.5 (253.9-710.1) | 505.3 (291.4-810.1) | 0.323 (0.293-0.353) |
| 80-84 years | 2.5 (1.4-4) | 7.1 (4-11) | 1.840 | 406.1 (226.5-635.8) | 456.6 (254.3-708.6) | 0.267 (0.24-0.294) |
| 85-89 years | 0.7 (0.4-1.1) | 2.2 (1.2-3.4) | 2.143 | 335 (181.7-524.2) | 375.5 (200.6-576) | 0.158 (0.084-0.231) |
| 90-94 years | 0.1 (0.1-0.2) | 0.5 (0.2-0.7) | 4.000 | 262 (132-406.4) | 291.6 (146.1-443.2) | 0.141 (-0.009-0.291) |
| 95+ years | 0 (0-0) | 0.1 (0-0.1) | Inf | 225.1 (113.2-359.5) | 235 (119.9-371.6) | 0.08 (-0.124-0.284) |
| Low-middle SDI | 40-44 years | 0.6 (0.3-1.2) | 1.2 (0.6-2.4) | 1.000 | 2.2 (1-4.3) | 2.1 (1-4.1) | -0.003 (-0.048-0.043) |
| 45-49 years | 4.6 (2-8.7) | 9.1 (4.1-17.3) | 0.978 | 20 (8.6-38.1) | 18.6 (8.3-35.2) | -0.031 (-0.106-0.044) |
| 50-54 years | 12.5 (6.5-21.5) | 24.9 (13-42.7) | 0.992 | 64.7 (33.8-111.4) | 59.7 (31.2-102.5) | -0.041 (-0.125-0.044) |
| 55-59 years | 25.1 (13.6-41.9) | 49.1 (26.7-82.1) | 0.956 | 156.6 (85.1-261.9) | 143.8 (78.3-240.4) | -0.035 (-0.124-0.053) |
| 60-64 years | 37.3 (20.1-62.7) | 75 (41.1-125.4) | 1.011 | 284.6 (153.8-478.9) | 270.3 (147.9-451.7) | 0.006 (-0.056-0.069) |
| 65-69 years | 40.4 (23.3-65.1) | 95.4 (55.4-153.2) | 1.361 | 437.8 (252.4-705.7) | 446.8 (259.6-717.7) | 0.108 (0.093-0.122) |
| 70-74 years | 33.7 (19.2-53.9) | 88.9 (50.4-141.9) | 1.638 | 549 (313.2-878.5) | 593.6 (336.9-947.8) | 0.193 (0.164-0.221) |
| 75-79 years | 20.9 (12.2-33.2) | 57.4 (33.6-90.5) | 1.746 | 555.9 (323.2-883.2) | 615.1 (360.1-969.8) | 0.257 (0.216-0.298) |
| 80-84 years | 10.1 (5.7-15.7) | 28 (15.9-43.2) | 1.772 | 499.2 (283.8-775.9) | 553.5 (313.6-853.7) | 0.285 (0.256-0.315) |
| 85-89 years | 3.3 (1.8-5) | 9.7 (5.4-14.8) | 1.939 | 413.5 (228.3-635.8) | 456.8 (254-693.4) | 0.252 (0.219-0.285) |
| 90-94 years | 0.6 (0.3-1) | 2.4 (1.2-3.5) | 3.000 | 320.8 (167.8-489.7) | 351.3 (182.5-525.2) | 0.199 (0.165-0.233) |
| 95+ years | 0.1 (0.1-0.2) | 0.4 (0.2-0.7) | 3.000 | 255.9 (134.6-399.9) | 262 (139.2-404.4) | -0.101 (-0.165--0.037) |
| Middle SDI | 40-44 years | 0.7 (0.3-1.5) | 1.5 (0.7-2.8) | 1.143 | 1.6 (0.7-3.3) | 1.8 (0.8-3.3) | 0.327 (0.199-0.455) |
| 45-49 years | 5.2 (2.3-10.1) | 10.8 (5-20.8) | 1.077 | 14.2 (6.2-27.8) | 13.3 (6.1-25.6) | 0.124 (-0.06-0.308) |
| 50-54 years | 15.1 (8-26.3) | 33 (18-56.3) | 1.185 | 47.5 (25.2-82.7) | 42.4 (23.2-72.3) | 0.067 (-0.108-0.242) |
| 55-59 years | 33.7 (18.1-56.9) | 75.8 (41.7-126.2) | 1.249 | 123.5 (66.5-208.7) | 112.3 (61.8-186.9) | 0.129 (-0.02-0.278) |
| 60-64 years | 53.1 (28.8-88.8) | 118.3 (65.9-194.3) | 1.228 | 245.4 (133.3-410.7) | 238.4 (132.9-391.6) | 0.069 (-0.049-0.186) |
| 65-69 years | 65.4 (38-106.8) | 169.9 (99.7-276.5) | 1.598 | 422.7 (245.8-689.9) | 395.1 (231.9-643.2) | 0.006 (-0.068-0.08) |
| 70-74 years | 59 (33.1-96.4) | 160.6 (92.3-256.7) | 1.722 | 582.3 (326.8-951.2) | 548.4 (315.3-876.7) | 0.01 (-0.054-0.073) |
| 75-79 years | 38.3 (22-60.2) | 110.3 (65.1-173.2) | 1.880 | 652.7 (374.9-1026.3) | 612.4 (361.4-961.6) | -0.027 (-0.094-0.039) |
| 80-84 years | 18.1 (10.1-27.7) | 60.9 (34-93.3) | 2.365 | 632 (353.9-969.8) | 593.6 (331.3-909.8) | -0.054 (-0.118-0.011) |
| 85-89 years | 5.6 (3.1-8.5) | 22.5 (12.3-33.6) | 3.018 | 525.3 (286.6-793.2) | 509.3 (278.9-761.2) | -0.014 (-0.054-0.026) |
| 90-94 years | 1 (0.5-1.4) | 5.2 (2.7-7.8) | 4.200 | 383 (200-579.1) | 393.6 (207.9-595.7) | 0.114 (0.1-0.128) |
| 95+ years | 0.1 (0.1-0.2) | 1 (0.5-1.5) | 9.000 | 287.5 (151.7-445.4) | 295.1 (157.8-452.1) | 0.088 (0.061-0.114) |
| High-middle SDI | 40-44 years | 0.5 (0.3-1.1) | 0.7 (0.3-1.3) | 0.400 | 1.7 (0.8-3.4) | 1.5 (0.7-2.9) | -0.425 (-0.599--0.249) |
| 45-49 years | 3.7 (1.6-7.1) | 5.6 (2.7-10.8) | 0.514 | 14.8 (6.6-28.6) | 11.5 (5.5-22.2) | -0.728 (-0.87--0.586) |
| 50-54 years | 14.7 (7.7-25) | 18.2 (9.8-30.6) | 0.238 | 55.9 (29.5-95.2) | 37.6 (20.3-63.2) | -0.882 (-1.089--0.675) |
| 55-59 years | 31.6 (17.1-53) | 46.6 (25.5-77.3) | 0.475 | 139.2 (75.3-233.6) | 105.8 (57.8-175.4) | -0.662 (-0.815--0.509) |
| 60-64 years | 56.9 (31.3-93.7) | 81.4 (45.3-133.1) | 0.431 | 284.8 (156.5-469) | 232.8 (129.6-380.8) | -0.643 (-0.797--0.49) |
| 65-69 years | 58.8 (34.8-92.9) | 117.8 (69.8-190.3) | 1.003 | 432.4 (255.8-683.6) | 380.6 (225.5-615) | -0.516 (-0.618--0.414) |
| 70-74 years | 47.8 (27.7-77) | 114.3 (67-182.7) | 1.391 | 567.6 (328.8-915) | 520.5 (305.1-831.8) | -0.26 (-0.365--0.154) |
| 75-79 years | 38.6 (22.3-59.9) | 69.8 (40.2-109.1) | 0.808 | 632.3 (364.9-982) | 538.5 (310.4-841.9) | -0.139 (-0.257--0.021) |
| 80-84 years | 17.8 (10-27.2) | 45.7 (25.7-68.3) | 1.567 | 573.5 (320.9-874.4) | 542.7 (305.3-812.2) | -0.012 (-0.113-0.09) |
| 85-89 years | 5 (2.7-7.4) | 17.3 (9.6-25.8) | 2.460 | 457.5 (250.7-684.5) | 441.2 (243.4-657.6) | 0.065 (-0.051-0.182) |
| 90-94 years | 0.8 (0.4-1.2) | 4.3 (2.3-6.5) | 4.375 | 332.1 (173.1-502.4) | 341.3 (179.8-513.5) | 0.286 (0.066-0.507) |
| 95+ years | 0.1 (0.1-0.2) | 0.7 (0.4-1) | 6.000 | 245.9 (129.8-377.9) | 244.1 (129-376.8) | 0.142 (-0.21-0.495) |
| High SDI | 40-44 years | 0.6 (0.3-1.2) | 1 (0.6-1.7) | 0.667 | 1.9 (0.9-3.7) | 2.6 (1.4-4.4) | 0.528 (0.226-0.831) |
| 45-49 years | 3.2 (1.6-5.7) | 4.8 (2.7-8) | 0.500 | 12.6 (6.4-22.3) | 12.9 (7.1-21.5) | 0.254 (0.162-0.346) |
| 50-54 years | 8.7 (4.9-14.6) | 13.3 (7.7-21.7) | 0.529 | 37.7 (21.4-63.4) | 35.4 (20.6-57.9) | 0.184 (0.085-0.283) |
| 55-59 years | 19.5 (11-31.8) | 31.6 (18.1-49.7) | 0.621 | 93.8 (52.7-153.1) | 87.1 (50-137.1) | 0.059 (-0.033-0.151) |
| 60-64 years | 33.1 (19.1-53.2) | 53.2 (31.3-82.9) | 0.607 | 175.3 (101.3-281.7) | 159.7 (93.8-248.8) | -0.048 (-0.139-0.043) |
| 65-69 years | 41.8 (25.4-65.2) | 73.1 (45.7-112) | 0.749 | 271.9 (165.3-423.8) | 251.5 (157.2-385.5) | -0.044 (-0.13-0.043) |
| 70-74 years | 35.9 (21.4-56.7) | 81.7 (50.1-128.1) | 1.276 | 342.5 (204.3-540.8) | 326.5 (200.3-511.6) | -0.004 (-0.065-0.057) |
| 75-79 years | 28.9 (17.4-44.6) | 56 (33.2-85.2) | 0.938 | 356.3 (214.5-549) | 342.6 (203.3-521.8) | 0.028 (-0.027-0.083) |
| 80-84 years | 14.8 (8.6-22.6) | 34.7 (20.9-52.1) | 1.345 | 318.1 (185.8-485.1) | 306.2 (184.7-459.4) | 0.07 (0.013-0.127) |
| 85-89 years | 4.9 (2.8-7.6) | 15.8 (8.9-23.2) | 2.224 | 258.2 (144.3-395.5) | 255.5 (144.8-375.5) | 0.18 (0.118-0.241) |
| 90-94 years | 1.1 (0.6-1.6) | 5.1 (2.8-7.5) | 3.636 | 203.6 (110.5-309.8) | 211 (116.9-311.5) | 0.242 (0.181-0.304) |
| 95+ years | 0.2 (0.1-0.3) | 1.3 (0.7-1.9) | 5.500 | 178.5 (92.6-278.4) | 180.7 (99.5-267) | 0.048 (-0.037-0.133) |
